# Supplementary material for: Total biosynthesis of cotylenin diterpene glycosides as 14-3-3 protein–protein interaction stabilizers
Source: Royal Society of Chemistry journal article supplement (doi:10.1039/d4sc05963h), 2024-11-28
Supplement: d4sc05963h1.pdf [file d4sc05963h1.pdf]

## Supporting Information

### Total Biosynthesis of Cotylenin Diterpene Glycosides as 14-3-3 Protein-Protein Interaction Stabilizers

Zhenhua Guan,<sup>a</sup> Nanyu Yao,<sup>a</sup> Wenling Yuan,<sup>a</sup> Fengli Li,<sup>a</sup> Yang Xiao,<sup>a</sup> Mewlude Rehmulla,<sup>a</sup> Yuhan Xie,<sup>a</sup> Chunmei Chen,<sup>a</sup> Hucheng Zhu,<sup>a</sup> Yuan Zhou,<sup>a</sup> Qingyi Tong,<sup>a</sup> Zheng Xiang,<sup>\*b</sup> Ying Ye,<sup>\*a</sup> Yonghui Zhang<sup>\*a</sup>

<sup>a</sup>Hubei Key Laboratory of Natural Medicinal Chemistry and Resource Evaluation, School of Pharmacy, Tongji Medical College, Huazhong University of Science and Technology, Wuhan 430030, People's Republic of China

<sup>b</sup>State Key Laboratory of Chemical Oncogenomics, Shenzhen Key Laboratory of Chemical Genomics, School of Chemical Biology and Biotechnology, Peking University Shenzhen Graduate School, Shenzhen, Guangdong 518055, China. / Institute of Chemical Biology, Shenzhen Bay Laboratory, Shenzhen, Guangdong 518132, China

E-mail: zxiang@pku.edu.cn

ying\_ye@hust.edu.cn

zhangyh@mails.tjmu.edu.cn

## TABLE OF CONTENTS

### EXPERIMENTAL PROCEDURES

|                                                                                              |   |
|----------------------------------------------------------------------------------------------|---|
| General                                                                                      | 1 |
| Strains                                                                                      | 1 |
| Genomic DNA preparation                                                                      | 1 |
| Plasmid construction                                                                         | 1 |
| Transformation of <i>A. oryzae</i>                                                           | 2 |
| Brassicicene I ( <b>8</b> ) isolated from <i>AO-abnABCDE</i>                                 | 2 |
| Extraction of the metabolites from the biotransformation and <i>Aspergillus oryzae</i> NSAR1 | 2 |
| Purification and characterization of compounds                                               | 3 |
| Expression and purification of recombinant CtyD, CtyE, CtyJ and Pa-orf11                     | 4 |
| In vitro assay of recombinant CtyD, CtyE, CtyJ, and Pa-orf11                                 | 5 |
| Isolation compound <b>9</b> and <b>10</b> from <i>in vitro</i> enzymatic reactions           | 5 |
| Heterologous expression of <i>ctyA</i> in <i>S. cerevisiae</i> RC01 and feeding experiments  | 6 |
| Expression, and preparation of CtyA-containing microsomes for in vitro assay                 | 6 |
| In vitro assays of CtyA                                                                      | 7 |
| Expression and purification of recombinant 14-3-3 $\zeta$                                    | 7 |
| Semisynthesis of ISIR-050 from compound <b>6</b>                                             | 8 |
| Anisotropy measurements                                                                      | 8 |

### SUPPLEMENTARY TABLES

|                                                                                                     |    |
|-----------------------------------------------------------------------------------------------------|----|
| Table S1. Oligonucleotides used for construction of plasmids                                        | 9  |
| Table S2. Summary of the transformants in this study                                                | 10 |
| Table S3. Comparative analysis of gene clusters of <i>cty</i> , <i>Pa</i> , <i>abn</i>              | 11 |
| Table S4. NMR data of compound <b>7</b> in CDCl <sub>3</sub>                                        | 12 |
| Table S5. NMR data of compound <b>6</b> in CD <sub>3</sub> OD                                       | 13 |
| Table S6. NMR data of compound <b>5</b> in CD <sub>3</sub> OD and CD <sub>3</sub> COCD <sub>3</sub> | 14 |
| Table S7. NMR data of compound <b>4</b> in CD <sub>3</sub> OD                                       | 16 |
| Table S8. NMR data of compound <b>3</b> in CD <sub>3</sub> OD and CD <sub>3</sub> COCD <sub>3</sub> | 18 |
| Table S9. NMR data of compound <b>2</b> in CD <sub>3</sub> OD and CD <sub>3</sub> COCD <sub>3</sub> | 20 |
| Table S10. NMR data of compound <b>12</b> in CD <sub>3</sub> OD                                     | 22 |
| Table S11. NMR data of compound <b>9</b> in CD <sub>3</sub> OD                                      | 24 |
| Table S12. NMR data of compound <b>10</b> in CD <sub>3</sub> OD                                     | 26 |
| Table S13. Gene sequences used in this work                                                         |    |

### SUPPLEMENTARY FIGURES

|                                                                                                                               |    |
|-------------------------------------------------------------------------------------------------------------------------------|----|
| Figure S 1. Diagram of cblaster                                                                                               | 33 |
| Figure S 2. EIC chromatography profile of <i>AO-AbnABCDE</i> and <i>AO-NSAR1</i>                                              |    |
| Figure S 3. EIC chromatography profile of <i>Talaromyces adpressus</i> fed with <b>8</b> , <b>6</b> , <b>4</b> , and <b>2</b> | 34 |
| Figure S 4. EIC chromatography profile of other gene were co-transformed with <i>ctyABDEJ</i>                                 | 35 |
| Figure S 5. The molecular docking between CtyD and its substrate <b>7</b>                                                     | 36 |
| Figure S 6. Phylogenetic analysis of CtyJ                                                                                     | 37 |
| Figure S 7. The molecular docking between CtyE and its substrate <b>6</b>                                                     | 38 |
| Figure S 8. A phylogenic tree of methyltransferases from bacterial and fungal origins                                         | 39 |
| Figure S 9. The molecular docking of CtyA with the substrate <b>4</b> and the coenzyme Heme                                   | 40 |

|                                                                                                                       |    |
|-----------------------------------------------------------------------------------------------------------------------|----|
| Figure S 10. EIC chromatography profile of <i>AO-ctyABDJ</i> and <i>AO-ctyABD-Orf11</i> fed with <b>8</b> .....       | 41 |
| Figure S 11. EIC chromatography profile of <i>Sc</i> expressing <i>ctyA</i> fed with <b>4</b> and <b>3</b> .....      | 41 |
| Figure S 12. FP measurements to obtain the EC <sub>50</sub> values of the 14-3-3ζ/ phosphopeptide .....               | 43 |
| Figure S 13. FP measurements to obtain the apparent K <sub>d</sub> of the 14-3-3ζ/ phosphopeptide .....               | 43 |
| Figure S 14. SDS-PAGE of MBP-CtyD, CtyE, CtyJ, Pa-orf11 and 14-3-3ζ .....                                             | 44 |
| Figure S 15. <sup>1</sup> H NMR spectrum of compound Fusicocca 2,10(14)-diene in CDCl <sub>3</sub> (600 MHz) .....    | 45 |
| Figure S 16. <sup>1</sup> H NMR spectrum of compound <b>8</b> in CDCl <sub>3</sub> (600 MHz) .....                    | 46 |
| Figure S 17. <sup>1</sup> H NMR spectrum of compound <b>7</b> in CDCl <sub>3</sub> (600 MHz) .....                    | 46 |
| Figure S 18. <sup>13</sup> C NMR spectrum of compound <b>7</b> in CDCl <sub>3</sub> (150 MHz) .....                   | 46 |
| Figure S 19. <sup>1</sup> H NMR spectrum of compound <b>6</b> in CD <sub>3</sub> COCD <sub>3</sub> (600 MHz) .....    | 47 |
| Figure S 20. <sup>1</sup> H NMR spectrum of compound <b>6</b> in CD <sub>3</sub> OD (600 MHz) .....                   | 47 |
| Figure S 21. <sup>13</sup> C NMR spectrum of compound <b>6</b> in CD <sub>3</sub> OD (150 MHz) .....                  | 48 |
| Figure S 22. <sup>1</sup> H NMR spectrum of compound <b>5</b> in CD <sub>3</sub> COCD <sub>3</sub> (600 MHz) .....    | 49 |
| Figure S 23. <sup>1</sup> H NMR spectrum of compound <b>5</b> in CD <sub>3</sub> OD (600 MHz) .....                   | 49 |
| Figure S 24. <sup>13</sup> C NMR spectrum of compound <b>5</b> in CD <sub>3</sub> OD (150 MHz) .....                  | 50 |
| Figure S 25. HSQC spectrum of compound <b>5</b> in CD <sub>3</sub> OD (600 MHz) .....                                 | 50 |
| Figure S 26. <sup>1</sup> H NMR spectrum of compound <b>4</b> in CD <sub>3</sub> COCD <sub>3</sub> (600 MHz) .....    | 51 |
| Figure S 27. <sup>1</sup> H NMR spectrum of compound <b>4</b> in CD <sub>3</sub> OD (600 MHz) .....                   | 51 |
| Figure S 28. <sup>13</sup> C NMR spectrum of compound <b>4</b> in CD <sub>3</sub> OD (150 MHz) .....                  | 52 |
| Figure S 29. <sup>1</sup> H NMR spectrum of compound <b>3</b> in CD <sub>3</sub> COCD <sub>3</sub> (600 MHz) .....    | 53 |
| Figure S 30. <sup>1</sup> H NMR spectrum of compound <b>3</b> in CD <sub>3</sub> OD (600 MHz) .....                   | 53 |
| Figure S 31. <sup>13</sup> C NMR spectrum of compound <b>3</b> in CD <sub>3</sub> OD (150 MHz) .....                  | 54 |
| Figure S 32. HSQC spectrum of compound <b>3</b> in CD <sub>3</sub> OD (600 MHz) .....                                 | 54 |
| Figure S 33. <sup>1</sup> H NMR spectrum of compound <b>2</b> in CD <sub>3</sub> COCD <sub>3</sub> (600 MHz) .....    | 55 |
| Figure S 34. <sup>1</sup> H NMR spectrum of compound <b>2</b> in CD <sub>3</sub> OD (600 MHz) .....                   | 55 |
| Figure S 35. <sup>13</sup> C NMR spectrum of compound <b>2</b> in CD <sub>3</sub> OD (150 MHz) .....                  | 56 |
| Figure S 36. HSQC spectrum of compound <b>2</b> in CD <sub>3</sub> OD (600 MHz) .....                                 | 56 |
| Figure S 37. <sup>1</sup> H NMR spectrum of compound <b>12</b> in CD <sub>3</sub> OD (600 MHz) .....                  | 57 |
| Figure S 38. <sup>13</sup> C NMR and DEPT spectrum of compound <b>12</b> in CD <sub>3</sub> OD (150 MHz) .....        | 57 |
| Figure S 39. HSQC spectrum of compound <b>12</b> in CD <sub>3</sub> OD (600 MHz) .....                                | 58 |
| Figure S 40. HMBC spectrum of compound <b>12</b> in CD <sub>3</sub> OD (600 MHz) .....                                | 58 |
| Figure S 41. <sup>1</sup> H- <sup>1</sup> H COSY spectrum of compound <b>12</b> in CD <sub>3</sub> OD (600 MHz) ..... | 59 |
| Figure S 42. NOESY spectrum of compound <b>12</b> in CD <sub>3</sub> OD (600 MHz) .....                               | 59 |
| Figure S 43. <sup>1</sup> H NMR spectrum of compound <b>9</b> in CD <sub>3</sub> OD (600 MHz) .....                   | 60 |
| Figure S 44. <sup>13</sup> C NMR and DEPT spectrum of compound <b>9</b> in CD <sub>3</sub> OD (150 MHz) .....         | 60 |
| Figure S 45. HSQC spectrum of compound <b>9</b> in CD <sub>3</sub> OD (600 MHz) .....                                 | 61 |
| Figure S 46. HMBC spectrum of compound <b>9</b> in CD <sub>3</sub> OD (600 MHz) .....                                 | 61 |
| Figure S 47. <sup>1</sup> H- <sup>1</sup> H COSY spectrum of compound <b>9</b> in CD <sub>3</sub> OD (600 MHz) .....  | 62 |
| Figure S 48. NOESY spectrum of compound <b>9</b> in CD <sub>3</sub> OD (600 MHz) .....                                | 62 |
| Figure S 49. <sup>1</sup> H NMR spectrum of compound <b>10</b> in CD <sub>3</sub> OD (600 MHz) .....                  | 63 |
| Figure S 50. <sup>13</sup> C NMR and DEPT spectrum of compound <b>10</b> in CD <sub>3</sub> OD (150 MHz) .....        | 63 |
| Figure S 51. HSQC spectrum of compound <b>10</b> in CD <sub>3</sub> OD (600 MHz) .....                                | 64 |
| Figure S 52. HMBC spectrum of compound <b>10</b> in CD <sub>3</sub> OD (600 MHz) .....                                | 64 |
| Figure S 53. <sup>1</sup> H- <sup>1</sup> H COSY spectrum of compound <b>10</b> in CD <sub>3</sub> OD (600 MHz) ..... | 65 |

|                                                                                           |    |
|-------------------------------------------------------------------------------------------|----|
| Figure S 54. NOESY spectrum of compound <b>10</b> in CD <sub>3</sub> OD (600 MHz) .....   | 65 |
| Figure S 55. <sup>1</sup> H NMR spectrum of ISIR-050 in CDCl <sub>3</sub> (600 MHz).....  | 66 |
| Figure S 56. <sup>13</sup> C NMR spectrum of ISIR-050 in CDCl <sub>3</sub> (150 MHz)..... | 66 |
| <b>SUPPLEMENTARY REFERENCES</b> .....                                                     | 67 |

## EXPERIMENTAL PROCEDURES

### General

High-resolution electrospray ionization mass spectrometry (HRESIMS) was obtained on Fisher LC-LTQ-Orbitrap XL spectrometer. HPLC-MS analyses were recorded on Agilent 1290 Infinity II - 6545B Q-TOF. NMR spectroscopic data were measured on Bruker AM-600 NMR spectrometer with CDCl<sub>3</sub>, CD<sub>3</sub>OD and CD<sub>3</sub>OCD<sub>3</sub> as solvent. Silica gel (100-200 mesh, 200-300 mesh, Qingdao Marine Chemical Inc., China) were used in the chromatography processes. Oligonucleotides for PCRs were purchased from Sangon Biotech (shanghai) Co., Ltd.

### Strains

*Escherichia coli* DH5 $\alpha$  was used for cloning and following standard recombinant DNA techniques. *Escherichia coli* BL21 was used for protein expression. *Aspergillus oryzae* NSAR1, a quadruple auxotrophic mutant (*niaD*<sup>-</sup>, *sC*<sup>-</sup>, *adeA*<sup>-</sup>, and *argB*<sup>-</sup>) was used as the host for gene expression. *Talaromyces adpressus* and *Alternaria brassicicola* XXC were grown on potato dextrose agar at 30°C for 4 days was used for gDNA extraction. *Saccharomyces cerevisiae* RC01, which contains a chromosome-integrated gene encoding a cytochrome P450 reductase (CPR) from *Aspergillus terreus*, was used for P450 gene overexpression<sup>1</sup>.

### Genomic DNA preparation.

Mycelia of *Talaromyces adpressus* and *Alternaria brassicicola* XXC were grown in potato dextrose agar (PDA) at 30°C for 4 days, which then were collected and lyophilized with liquid nitrogen. The mycelia were grinded via Tissuelyser (Shanghai Jinxing Co., Ltd, China). Then genomic DNA were extracted by fungal genomic DNA extraction kit (BioFlux) according to the instruction of the manufacturer.

### Plasmid construction.

The primers used in this study were listed in Table S1. The recombinant plasmids were summarized in Table S2.

To construct expression plasmids for *Aspergillus oryzae*, the genes *abnA*, *abnB*, *abnC*, *abnD*, *abnE*, *ctyA*, *ctyB*, *ctyD*, *ctyE*, *ctyF*, *ctyJ* were amplified from the genomic DNA of *Alternaria brassicicola* XXC and *Talaromyces adpressus* respectively, the sequences of *Pa-orf11* was purchased from Nanjing GenScript Inc., China. Linker region of the fellow plasmids was amplified from pAdeA2. Twelve expression plasmids were constructed as follows. The KpnI digested fragments of pUSA2 plasmid were subjected to Gibson assembly (NEBuilder HiFi DNA Assembly Master Mix, New England BioLabs) with *abnE* to construct pUSA2-*abnE*. pAdeA2-*ctyA*, pAdeA2-*ctyB*, pUARA2-*ctyA*, pUSA2-*ctyE* and pAdeA2-*ctyF* were similarly constructed by Gibson assembly. The KpnI and NheI digested fragments of pAdeA2 plasmid were subjected to Gibson assembly (NEBuilder HiFi DNA Assembly Master Mix, New England BioLabs) with *abnA*, *abnB* and corresponding linker to construct pAdeA2-*abnAB*. The pAdeA2-*ctyBD*, pUSA2-*ctyEJ*, pUARA2-*ctyAJ*, pUARA2-*ctyA-Pa-orf11* and pUARA2-*abnCD* were also constructed by Gibson assembly.

For CtyD, CtyE, CtyJ, Pa-orf11, 14-3-3 $\zeta$  proteins preparation, *ctyD*, *ctyE*, *ctyJ* were amplified from the genomic DNA of *Talaromyces adpressus*, the sequences of *Pa-orf11* and human 14-3-3 proteins isoforms  $\zeta$  were purchased from Nanjing GenScript Inc., China. The EcoRI and NcoI

digested fragments of pETM41 plasmid were subjected to Gibson assembly (NEBuilder HiFi DNA Assembly Master Mix, New England BioLabs) with *ctyD* to construct pETM41-*ctyD*. The EcoRI and XhoI digested fragments of pET28a plasmid were subjected to Gibson assembly (NEBuilder HiFi DNA Assembly Master Mix, New England BioLabs) with *ctyE* to construct pET28a-*ctyE*. pET28a-*ctyJ*, pET28a-*Pa-orf11*, and pET28a-14-3-3 $\zeta$  were similarly constructed by Gibson assembly.

To express *ctyA* gene in *S. cerevisiae*, the intron-free *ctyA* was amplified from the cDNA of recombinant AO-*ctyA* strain. The SpeI and PmlI digested fragments of XW55 plasmid was subjected to Gibson assembly (NEBuilder HiFi DNA Assembly Master Mix, New England BioLabs) with intron-free *ctyA* to construct XW55-*ctyA*.

#### **Transformation of *A. oryzae*.**

Transformation of *A. oryzae* was performed by the protoplast-polyethylene glycol method reported previously to construct the following transformants<sup>2</sup>; AO-*abnABCDE*, AO-*ctyA*, AO-*ctyB*, AO-*ctyF*, AO-*ctyBD*, AO-*ctyBDE*, AO-*ctyBDEJ*, AO-*ctyABDEJ*, AO-*ctyABDJ*, and AO-*ctyABD-Pa-orf11*. Plasmids used for the construction of each transformant are summarized in **Table S2**.

#### **Brassicicene I (8) isolated from AO-*abnABCDE*.**

Spore suspension of transformant AO-*abnABCDE* was inoculated into MPY medium (3% maltose, 1% hipolypeptone, 0.5% yeast extract, 0.925% (NH<sub>4</sub>)<sub>2</sub>SO<sub>4</sub>, 200 mL) in 1000 mL Erlenmeyer flasks. Each culture was added 3 g Amberlite XAD-16 packaged in tea bag. After incubating for 3 to 5 days at 30 °C, the Amberlite XAD-16 and liquid part were separated by filtration. Then the liquid part was extracted three times using EtOAc, the Amberlite XAD-16 was soaked with MeOH for three times. All the organic phase was concentrated in vacuo to afford crude extracts (2 g from 4 L of MPY medium), which was loaded on silica gel column chromatography (CC, 200–300 mesh) eluting with petroleum ether (PE)-ethyl acetate (EtOAc) system (100:1→50:1→30:1→15:1→8:1) to yield five fractions (A–E). Brassicicene I (**8**) (60 mg) was obtained from the fraction E.

Brassicicene I (**8**); colorless oil, [ $\alpha$ ]<sub>D</sub><sup>25</sup>: +27° (c 0.11, CH<sub>3</sub>OH). <sup>1</sup>H and <sup>13</sup>C NMR data are in good agreement with reported ones<sup>3</sup>.

#### **Extraction of the metabolites from the biotransformation AO-*ctyF*, AO-*ctyB*, AO-*ctyBD*, AO-*ctyBDE*, AO-*ctyBDEJ*, AO-*ctyABDEJ*, AO-*ctyABDJ*, and AO-*ctyABD-Pa-orf11*.**

Spore suspension of each transformant was inoculated into MPY medium (3% maltose, 1% hipolypeptone, 0.5% yeast extract, 10 mg adenine, 100 mL) in 500 mL Erlenmeyer flasks. Each culture was incubated at 30 °C for 1 day. Each culture was added brassicicene I (**8**) (0.05 mmol/L) and was continued to incubate at 30 °C for 3 days. If appropriate, the mycelia and culture broth was separated prior to extraction. After the extraction with EtOAc, the extract was concentrated in vacuo to afford crude extracts. The crude extracts were analyzed by LC-MS with Eclipse Plus C18 column (2.1 × 100 mm, 3.5  $\mu$ m) at the following condition unless otherwise noted; CH<sub>3</sub>CN and H<sub>2</sub>O (each contained 0.1% HCOOH) were used as eluents. The concentration of CH<sub>3</sub>CN was linearly increased from 5% to 98% over 11 min and kept at 100% for 2 min. Flow rate was kept at 0.5 mL min<sup>-1</sup>. The column temperature was kept at 25 °C. Metabolites were analyzed in ESI positive mode.

#### **Extraction of the metabolites from *Aspergillus oryzae* NSAR1 and AO-*ctyA*.**

Spore suspension of *Aspergillus oryzae* NSAR1 and AO-*ctyA* were inoculated into MPY

medium (3% maltose, 1% hipolypeptone, 0.5% yeast extract, 10 mg adenine, 100 mL) in 50 mL Erlenmeyer flasks. Each culture was incubated at 30 °C for 1 day. **4** and **3** (0.05 mmol/L) were added to the culture of *AO-ctyA* and *Aspergillus oryzae NSAR1* respectively. Then the culture of *Aspergillus oryzae NSAR1* was continued to incubate at 30 °C for 3 days, and the culture of *AO-ctyA* was continued to incubate at 30 °C for 1.5, 2.5, 3.5 days. If appropriate, the mycelia and culture broth was separated prior to extraction. After the extraction with EtOAc, the extract was concentrated in vacuo to afford crude extracts. The crude extracts were analyzed by LC-MS with Eclipse Plus C18 column (2.1 × 100 mm, 3.5 μm) at the following condition unless otherwise noted; CH<sub>3</sub>CN and H<sub>2</sub>O (each contained 0.1% HCOOH) were used as eluents. CH<sub>3</sub>CN and H<sub>2</sub>O (each contained 0.1% HCOOH) were used as eluents. The concentration of CH<sub>3</sub>CN was linearly increased from 5% to 98% over 11 min and kept at 100% for 2 min. Flow rate was kept at 0.5 ml min<sup>-1</sup>. The column temperature was kept at 25 °C. Metabolites were analyzed in ESI positive mode.

#### **Fusicocca 2,10(14)-diene isolated from *AO-ctyF***

The crude extracts (1.1 g from 4 L of MPY medium) were loaded on silica gel column chromatography (CC, 200–300 mesh) eluting with petroleum ether (PE) to yield Fusicocca 2,10(14)-diene (18.3mg) as colorless solid. The NMR data are in good agreement with the reported data<sup>4</sup>.

#### **Compound 7 isolated from *AO-ctyB***

The crude extracts (1.5 g from 4 L of MPY medium) were loaded on silica gel column chromatography (CC, 200–300 mesh) eluting with petroleum ether (PE)-ethyl acetate (EtOAc) system (100:1→50:1→20:1→10:1→5:1) to yield five fractions (A–E). Cotylenol (28.2 mg) was obtained from the fraction E.

Compound **7**; colorless solid, HR-ESIMS: calcd. for C<sub>21</sub>H<sub>34</sub>O<sub>4</sub> [M+Na]<sup>+</sup> : 373.2349, found: 373.2352. [α]<sub>25</sub> D: -88° (c 0.11, CH<sub>3</sub>OH).

#### **Compound 6 isolated from *AO-ctyBD***

The crude extracts (1.3 g from 4 L of MPY medium) were purified with silica gel column chromatography (DCM:MeOH), stepwise elution from 500:1 to 2:1). Purification of partially purified metabolites with HPLC equipped with ZORBAX SB-C18 (9.4 × 250 mm, 5 μm) at the conditions (27% acetonitrile at a flow rate of 2.0 mL min<sup>-1</sup>) gave **6** (16.2 mg).

Compound **6**; colorless solid, HR-ESIMS: calcd. for C<sub>27</sub>H<sub>44</sub>O<sub>9</sub> [M+Na]<sup>+</sup> : 535.2878, found: 535.2891. [[α]<sub>25</sub> D: +61° (c 0.15, CH<sub>3</sub>OH).

#### **Cotylenin E (5) isolated from *AO-ctyABDEJ***

The crude extracts (3.5 g from 8 L of MPY medium) were purified with silica gel column chromatography ((*n*-hexane:EtOAc), stepwise elution from 50:1 to 0:1). Purification of partially purified metabolites with HPLC equipped with ZORBAX SB-C18 (9.4 × 250 mm, 5 μm) at the conditions (32% acetonitrile at a flow rate of 2.0 mL min<sup>-1</sup>) gave **5** (10.2 mg).

**Cotylenin E (5)**; colorless solid, HR-ESIMS: calcd. for C<sub>28</sub>H<sub>46</sub>O<sub>9</sub> [M+Na]<sup>+</sup> : 549.3034, found: 549.3048. [α]<sub>25</sub> D +59° (c 0.15, CH<sub>3</sub>OH).

#### **Cotylenin I (4) isolated from *AO-ctyBDEJ***

The crude extracts (1.2 g from 4 L of MPY medium) were purified with silica gel column

chromatography ((*n*-hexane:EtOAc), stepwise elution from 50:1 to 0:1). Purification of partially purified metabolites with HPLC equipped with ZORBAX SB-C18 (9.4 × 250 mm, 5 μm) at the conditions (45% acetonitrile at a flow rate of 2.0 mL min<sup>-1</sup>) gave **4** (8.8 mg).

**Cotyleenin I (4)**; colorless solid, HR-ESIMS: calcd. for C<sub>33</sub>H<sub>54</sub>O<sub>9</sub> [M+Na]<sup>+</sup> : 617.3660, found:617.3664. [α]<sub>25</sub> D: +94° (c 0.15, CH<sub>3</sub>OH).

#### **Cotyleenin F (3) isolated from AO-ctyABDEJ**

The crude extracts (3.5 g from 8 L of MPY medium) were purified with silica gel column chromatography ((*n*-hexane:EtOAc), stepwise elution from 50:1 to 0:1). Purification of partially purified metabolites with HPLC equipped with ZORBAX SB-C18 (9.4 × 250 mm, 5 μm) at the conditions (39% acetonitrile at a flow rate of 2.0 mL min<sup>-1</sup>) gave **3** (11.4 mg).

**Cotyleenin F (3)**; colorless solid, HR-ESIMS: calcd. for C<sub>33</sub>H<sub>54</sub>O<sub>11</sub> [M+Na]<sup>+</sup> : 649.3558, found:649.3573. [α]<sub>25</sub> D: +26° (c 0.15, CH<sub>3</sub>OH).

#### **Cotyleenin C (2) isolated from AO-ctyABDEJ**

The crude extracts (3.5 g from 8 L of MPY medium) were purified with silica gel column chromatography ((*n*-hexane:EtOAc), stepwise elution from 50:1 to 0:1). Purification of partially purified metabolites with HPLC equipped with ZORBAX SB-C18 (9.4 × 250 mm, 5 μm) at the conditions (39% acetonitrile at a flow rate of 2.0 mL min<sup>-1</sup>) gave **2** (11.4 mg).

**Cotyleenin C (2)**; colorless solid, HR-ESIMS: calcd. for C<sub>33</sub>H<sub>52</sub>O<sub>11</sub> [M+Na]<sup>+</sup> : 647.3402, found:647.3399. [α]<sub>25</sub> D: +139° (c 0.15, CH<sub>3</sub>OH).

#### **12 isolated from AO-ctyABDJ**

The crude extracts (3.5 g from 8 L of MPY medium) were purified with silica gel column chromatography ((*n*-hexane:EtOAc), stepwise elution from 50:1 to 0:1). Purification of partially purified metabolites with HPLC equipped with ZORBAX SB-C18 (9.4 × 250 mm, 5 μm) at the conditions (39% acetonitrile at a flow rate of 2.0 mL min<sup>-1</sup>) gave **12** (1.8 mg).

**12**; colorless solid, HR-ESIMS: calcd. for C<sub>32</sub>H<sub>52</sub>O<sub>10</sub> [M+Na]<sup>+</sup> : 619.3453, found:619.3460. [α]<sub>25</sub> D: +83° (c 0.15, CH<sub>3</sub>OH).

#### **Expression and purification of recombinant CtyD, CtyE, CtyJ and Pa-orf11**

The pETM41 vector containing *ctyD* and pET28a vectors containing the *ctyE*, *ctyJ* and *Pa-orf11* gene were prepared previously. The plasmid was transformed into *Escherichia coli* BL21(DE3) competent cell and used for the expression of CtyD, CtyE, CtyJ and Pa-orf11. The cells harboring the plasmids were cultured at 37 °C to an OD<sub>600</sub> of 0.6 in Luria-Bertani medium, containing 50 μg/ml kanamycin and 1 mol/L. Isopropyl β-D-thiogalactopyranoside (IPTG) was then added to 0.5 mmol/L (final concentration) for target protein expression, and the cultures were continued for 20 h at 16 °C. All purification steps were performed at 4 °C. The cultured cells were resuspended in 50 mmol/L NaH<sub>2</sub>PO<sub>4</sub>·H<sub>2</sub>O, pH 8.0, containing 10% (v/v) glycerol, 300 mmol/L NaCl, and 10 mmol/L imidazole (Lysis buffer). The cells were lysed by sonication and the insoluble debris was removed by centrifugation at 12,000 g for 30 min. The supernatant was loaded onto a Ni-NTA Resin (Thermo Fisher Scientific) column. The resin was washed with 50 column volumes of Lysis buffer containing 40 mmol/L imidazole, and then the CtyD, CtyE, CtyJ and Pa-orf11 was eluted with Lysis buffer containing 250 mmol/L imidazole. The protein solution was concentrated with Amicon Ultra-15 centrifugal filter devices (10 K MWCO, Millipore). The target protein was eluted with 50 mmol/L HEPES containing 100 mmol/L NaCl and 10% (v/v) glycerol, stored at -80 °C. The purity of the



enzymes was monitored by SDS-PAGE. These results are summarized in Figure S14. The protein concentrations were calculated by measuring the ultraviolet absorption at  $A_{280}$ .

#### **In vitro assay of recombinant CtyD**

The assay mixture for CtyD contained, in a final volume of 200  $\mu$ L, 0.25 mmol/L cotylenol, 1 mmol/L UDP-glucose, 5 mmol/L  $\text{CaCl}_2$ , 50 mM Tris-HCl (pH 7.5), and 2  $\mu$ mol/L CtyD. The mixture was incubated at 30  $^\circ\text{C}$  for 2 h. Then the reaction was stopped by the addition of methanol (200  $\mu$ L). LC-MS analysis was performed with an Eclipse Plus C18 column (2.1  $\times$  100 mm, 3.5  $\mu$ m) at the following condition;  $\text{CH}_3\text{CN}$  and  $\text{H}_2\text{O}$  (each contained 0.1% HCOOH) were used as eluents. The concentration of  $\text{CH}_3\text{CN}$  was linearly increased from 5% to 98% over 11 min and kept at 100% for 2 min. Flow rate was kept at 0.5 ml/min. Metabolites were analyzed in ESI positive mode.

#### **In vitro assay of recombinant CtyE**

The assay mixture for CtyE contained, in a final volume of 200  $\mu$ L, 0.25 mmol/L of compound **6** and **9**, 1 mmol/L S-adenosyl-L-methionine (SAM), 50 mM Tris-HCl (pH 7.5), and 2  $\mu$ mol/L CtyE. The reaction mixture was incubated at 30  $^\circ\text{C}$  for 2 h. Then the reaction was stopped by the addition of methanol (200  $\mu$ L). LC-MS analysis was performed with an Eclipse Plus C18 column (2.1  $\times$  100 mm, 3.5  $\mu$ m) at the following condition;  $\text{CH}_3\text{CN}$  and  $\text{H}_2\text{O}$  (each contained 0.1% HCOOH) were used as eluents. The concentration of  $\text{CH}_3\text{CN}$  was linearly increased from 5% to 98% over 11 min and kept at 100% for 2 min. Flow rate was kept at 0.5 ml/min. Metabolites were analyzed in ESI positive mode.

#### **In vitro assay of recombinant CtyJ**

The assay mixture (200  $\mu$ L) for CtyJ contained, in a final volume of 200  $\mu$ L, 0.25 mmol/L compound **6**, 1 mmol/L DMAPP, 5 mmol/L  $\text{CaCl}_2$ , Tris-HCl (50 mM, pH 7.5), and 2  $\mu$ mol/L CtyJ. This mixture was incubated at 30  $^\circ\text{C}$  for 2 h, and the reaction was stopped by the addition of methanol (200  $\mu$ L). LC-MS analysis was performed with an Eclipse Plus C18 column (2.1  $\times$  100 mm, 3.5  $\mu$ m) at the following condition;  $\text{CH}_3\text{CN}$  and  $\text{H}_2\text{O}$  (each contained 0.1% HCOOH) were used as eluents. The concentration of  $\text{CH}_3\text{CN}$  was linearly increased from 5% to 98% over 11 min and kept at 100% for 2 min. Flow rate was kept at 0.5 ml/min. Metabolites were analyzed in ESI positive mode.

#### **In vitro assay of recombinant Pa-orf11**

The assay mixture (200  $\mu$ L) for CtyJ contained, in a final volume of 200  $\mu$ L, 0.25 mmol/L compound **6**, 1 mmol/L DMAPP, 5 mmol/L  $\text{CaCl}_2$ , Tris-HCl (50 mM, pH 7.5), and 2  $\mu$ mol/L CtyJ. This mixture was incubated at 30  $^\circ\text{C}$  for 2 h, and the reaction was stopped by the addition of methanol (200  $\mu$ L). LC-MS analysis was performed with an Eclipse Plus C18 column (2.1  $\times$  100 mm, 3.5  $\mu$ m) at the following condition;  $\text{CH}_3\text{CN}$  and  $\text{H}_2\text{O}$  (each contained 0.1% HCOOH) were used as eluents. The concentration of  $\text{CH}_3\text{CN}$  was linearly increased from 5% to 98% over 11 min and kept at 100% for 2 min. Flow rate was kept at 0.5 ml/min. Metabolites were analyzed in ESI positive mode.

#### **Isolation of each product from *in vitro* enzymatic reactions**

**Compound 9:** To isolate compounds **9** from the *in vitro* enzymatic reactions, the purified CtyJ (final conc. 4 mg/mL) was added to 100 mL reaction buffer (50 mmol/L Tris-HCl buffer pH 7.5) and incubated with 0.25 mmol/L of compounds **6** and 1 mmol/L DMAPP at 30  $^\circ\text{C}$  for 4 h. The reaction

was quenched by adding an equivalent volume of MeOH. The samples were centrifuged and clarified with a 0.22  $\mu\text{m}$  filter, and the reaction products were further purified by reverse-phase preparative HPLC (52% aqueous acetonitrile, 2.0 mL/min) using a ZORBAX SB-C18 Column (9.4  $\times$  250 mm, 5  $\mu\text{m}$ )

Compound **9**; colorless solid, HR-ESIMS: calcd. for  $\text{C}_{32}\text{H}_{52}\text{O}_9$   $[\text{M}+\text{Na}]^+$  : 603.3504, found:603.3509.  $[\alpha]_{25}^{\text{D}}$ : +81° (c 0.15,  $\text{CH}_3\text{OH}$ ).

**Compound 10**: To isolate compounds **9** from the *in vitro* enzymatic reactions, the purified Pa-orf11 (final conc. 4 mg/mL) was added to 100 mL reaction buffer (50 mmol/L Tris-HCl buffer pH 7.5) and incubated with 0.25 mmol/L of compounds **6** and 1 mmol/L DMAPP at 30 °C for 4 h. The reaction was quenched by adding an equivalent volume of MeOH. The samples were centrifuged and clarified with a 0.22  $\mu\text{m}$  filter, and the reaction products were further purified by reverse-phase preparative HPLC (52% aqueous acetonitrile, 2.0 mL/min) using a ZORBAX SB-C18 Column (9.4  $\times$  250 mm, 5  $\mu\text{m}$ )

Compound **10**; colorless solid, HR-ESIMS: calcd. for  $\text{C}_{32}\text{H}_{52}\text{O}_9$   $[\text{M}+\text{Na}]^+$  : 603.3504, found:603.3499.  $[\alpha]_{25}^{\text{D}}$ : +37° (c 0.15,  $\text{CH}_3\text{OH}$ ).

#### **Heterologous expression of *ctyA* in *S. cerevisiae* RC01 and feeding experiments**

To heterologously express *ctyA* gene in *S. cerevisiae* RC01, plasmids XW55-*ctyA* was transformed to competent cells of *S. cerevisiae* RC01 using Frozen-EZ Yeast Transformation II Kit, and the transformation mixture was cultured on solid SD medium (6.7 g/L YNB, 20 g/L glucose, 100 mL/L amino acid mixture) at 30 °C for 2 days to obtain the transformant. The transformant was inoculated in 2 mL SD medium at 28 °C and 250 rpm for 15 h to get seed culture. 200  $\mu\text{L}$  seed culture was transferred to 20 mL YPD medium (1% yeast extract, 2% tryptone, 2% glucose) at 28°C and 250 rpm for additional 3 days. 20 mL of YPD medium was concentrated to 2 mL by centrifugation and then resuspended. 4 $\mu\text{L}$  **4** and **3** (5 mM in DMSO) were added to the culture and cultivated for one day. The mixture was extracted with ethyl acetate and acetone (v:v=3:1). After centrifugation at 12000 g for 5 min, the cells were extracted with acetone followed by evaporation of the organic solvent. The cell-free medium suspension was extracted with EtOAc followed by evaporation of the organic solvent. The extracts were then dissolved in methanol and analyzed by LC-MS. LC-MS analysis was performed with an Eclipse Plus C18 column (2.1  $\times$  100 mm, 3.5  $\mu\text{m}$ ) at the following condition;  $\text{CH}_3\text{CN}$  and  $\text{H}_2\text{O}$  (each contained 0.1% HCOOH) were used as eluents. The concentration of  $\text{CH}_3\text{CN}$  was linearly increased from 5% to 98% over 11 min and kept at 100% for 2 min. Flow rate was kept at 0.5 ml  $\text{min}^{-1}$ . Metabolites were analyzed in ESI positive mode.

#### **Expression, and preparation of CtyA-containing microsomes for in vitro assay.**

For expression of CtyA, the cells were grown in YPD medium supplemented with 1% dextrose at 28°C with shaking for 48 hours. The microsomes were prepared according to the protocol described previously<sup>5</sup>. Briefly, the cells were harvested by centrifugation (3,750 rpm at 4 °C for 10 mins) and the cell pellet was washed with 100 mL of TES buffer (50 mM Tris-HCl, pH, 7.5, 1 mM EDTA, 0.6 M sorbitol). The cells were centrifuged as above, resuspended in 100 mL of TES-M (TES supplemented with 10 mM 2-mercaptoethanol), and allowed to incubate at room temperature for 10 min. The yeast cells were centrifuged again at 3,750 rpm for 10 min, and the pellet was resuspended in 90 mL of extraction buffer (1% bovine serum albumin, fraction V, 2 mM 2-mercaptoethanol, 1 mM phenylmethylsulfonyl fluoride, all dissolved in TES). Cell walls were

disrupted by high pressure homogenizer (Scientz-150) at 1200 bar at 4 °C for 40 mins. Finally, microsomes were obtained by differential centrifugation at 10,000g for 30 min at 4°C to remove cellular debris followed by centrifugation at 100,000g for 70 min at 4°C. The microsomal pellets were resuspended in 1.5 mL of TEG-M buffer (50 mM Tris–HCl, pH 7.5, 1 mM EDTA, 20% glycerol, and 1.5 mM 2-mercaptoethanol) and stored frozen at -80 °C.

#### **In vitro assays of microsome fraction from yeast expressing CtyA.**

For in vitro assays of CtyA, 10 mg/mL (wet weight) microsomal fractions containing CtyA, 0.1 mM substrates **4**, 2 mM NADPH in 100 mM PBS, pH 7.4, were incubated in a total 100 µL reaction. The reaction was incubated at room temperature overnight and extracted with 100 µL ethyl acetate twice. The organic phase was dried and dissolved in MeOH for analysis on LC-MS. LC-MS analysis was performed with an Eclipse Plus C18 column (2.1 × 100 mm, 3.5 µm) at the following condition; CH<sub>3</sub>CN and H<sub>2</sub>O (each contained 0.1% HCOOH) were used as eluents. The concentration of CH<sub>3</sub>CN was linearly increased from 5% to 98% over 11 min and kept at 100% for 2 min. Flow rate was kept at 0.5 ml min<sup>-1</sup>. Metabolites were analyzed in ESI positive mode.

#### **Expression and purification of recombinant 14-3-3ζ.**

The pET28a vectors containing the 14-3-3ζ gene was prepared previously. The *E. coli* BL21 (DE3) transformed with the cloned vector have been used to inoculate 50ml of Luria-Bertani (LB)-media with 50 µg ml<sup>-1</sup> kanamycin. The culture was grown for 12 h at 310 K during vigorous shaking. The preculture was used to inoculate a 5 L terrific broth (TB) culture with 50 µg ml<sup>-1</sup> kanamycin. The culture was put at 310 K shaking at 140 rpm until an OD600 of 0.4-0.6 was reached. Protein expression was started by adding 0.4 mM IPTG to the culture. The culture was incubated at 298 K for 12 h and then harvested by centrifugation. The bacteria pellet was resuspended in 50 ml lysis buffer containing 50 mM Tris/HCl, 300 mM NaCl, 5% glycerol, 10 mM imidazole, 0.5 mM TCEP, and 1 mM PMSF, pH 8.0. The cells were lysed using an ultrasonic cell disruptor. The lysate was cleared by centrifugation at 12000 g for 30 minutes at 277 K. The HIS-tagged 14-3-3ζ protein was purified using Ni-NTA-Resin (Thermo Fisher Scientific) according to the manufacturer's manual. The resin was washed in a buffer containing 50 mM Tris, 500 mM NaCl, 5% glycerol 25 mM imidazole, and 0.5 mM TCEP, pH 8.0. The protein was eluted in a buffer containing 50 mM HEPES, 200 mM NaCl, 5% glycerol, 250 mM imidazole, 0.5 mM TCEP, pH 8.0. The protein solution was further concentrated to a volume of 2 ml with Amicon Ultra-15 centrifugal filter devices (10 K MWCO, Millipore) for gel filtration. The gel filtration was performed using an Äkta Prime and a superdex 75 16/60 gel filtration column (GE Healthcare, Freiburg, Germany). The buffer contained 25 mM HEPES, 100 mM NaCl, 10 mM MgCl<sub>2</sub>, 1 mM TCEP, pH 8.0. The 14-3-3ζ protein was then pooled according to the elution profile and concentrated to 75mg/ml. The protein was aliquoted and flash frozen in liquid nitrogen and stored at 193 K.

## Semisynthesis of ISIR-050 from compound 6

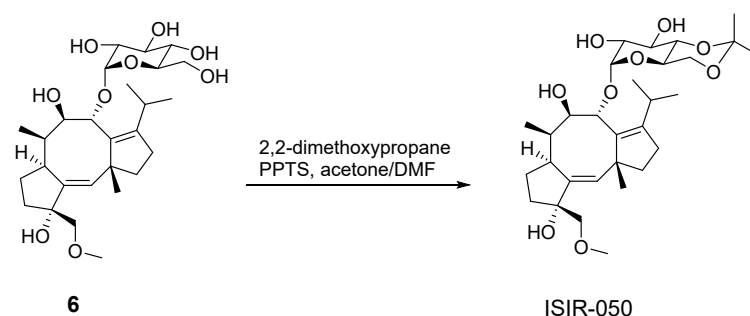

To a solution of **6** (10.2 mg, 20  $\mu$ mol) in a mixture of anhydrous acetone (1 mL) and anhydrous DMF (50  $\mu$ L) was added PPTS (1 mg, 4  $\mu$ mol) and 2,2-dimethoxypropane (7.5  $\mu$ L, 60  $\mu$ mol). After stirring at rt for 18 h, the resulting mixture was diluted with EtOAc and poured into brine. The organic layer was separated, and the aqueous layer was extracted with EtOAc. The combined organic layers were washed with water and brine, and then dried over sodium sulfate. After filtration, the solvent was removed in vacuo. The resulting residue was purified by flash column chromatography on silica gel to yield ISIR-050 as a colorless solid (8.1 mg, 80%). ISIR-050:  $^1\text{H-NMR}$  (600 MHz,  $\text{CDCl}_3$ )  $\delta$ : 5.54 (1H, d,  $J = 2.5$  Hz), 5.01 (1H, d,  $J = 3.8$  Hz), 3.99 (1H, dd,  $J = 10.1, 4.4$  Hz), 3.87 (1H, t,  $J = 9.2$  Hz), 3.83 (1H, d,  $J = 10.1$  Hz), 3.79-3.72 (2H, m), 3.70-3.67 (2H, m), 3.46 (1H, t,  $J = 9.2$  Hz), 3.40 (3H, s), 3.37 (1H, d,  $J = 9.5$  Hz), 3.21 (1H, m), 3.11 (1H, d,  $J = 9.5$  Hz), 2.95 (1H, td,  $J = 8.3, 2.5$  Hz), 2.17-2.12 (2H, m), 2.03 - 1.93 (3H, m), 1.83 (1H, ddd,  $J = 12.0, 5.8, 4.1$  Hz), 1.70 (1H, m), 1.48 (3H, s), 1.42 (1H, m), 1.39 (3H, s), 1.30 (1H, m), 1.20 (3H, s), 1.10 (3H, d,  $J = 6.7$  Hz), 0.98 (3H, d,  $J = 6.8$  Hz).  $^{13}\text{C-NMR}$  (150 MHz,  $\text{CDCl}_3$ )  $\delta$ : 149.9, 139.9, 135.1, 134.7, 101.7, 99.8, 82.1, 78.1, 77.9, 77.5, 74.1, 73.2, 71.8, 63.7, 62.6, 59.5, 52.3, 42.7, 41.5, 40.3, 35.6, 31.8, 29.2, 28.1, 27.0, 26.6, 21.4, 21.0, 19.3, 8.6. HR-ESIMS:  $m/z$  calcd for  $\text{C}_{30}\text{H}_{48}\text{O}_9$  [ $\text{M} + \text{Na}$ ] $^+$  575.3196, found 575.3181.

### Anisotropy measurements.

FAM-QHRY-pS-TPHAFTFNTSSPSEGLSQRQRST-pS-TPNVH peptide was purchased from NovoPro Bioscience Inc. FAM-labeled di-phosphorylated peptides were diluted to 20 nM in buffer (10 mM HEPES, 150 mM NaCl, 0.1 % Tween-20, 0.1 % BSA, pH 7.4) and titrated with His-14-3-3 $\zeta$  in a serial dilution in 384-well plates<sup>6</sup>. The purification of 14-3-3 $\zeta$  was performed as described before and the concentrated protein was dialyzed against dialysis buffer (25 mM HEPES/NaOH, pH 7.5, 100 mM NaCl, 2 mM  $\text{MgCl}_2$  and 4 mM 2-Mercaptoethanol). Anisotropy was measured using white light and standard excitation ( $485 \pm 10$  nm) and emission ( $535 \pm 12.5$  nm) filters in a BioTek Synergy 2 Multimode Plate Reader.

First, the peptides were titrated with His-14-3-3 $\zeta$  in order to obtain a  $K_d$  value and select an appropriate concentration for the subsequent stabilization experiments. For the determination of  $\text{EC}_{50}$ -values, a solution comprising 20 nM FAM-labelled phosphopeptide and 250 nM His-14-3-3 $\zeta$  was titrated with the respective compound. The measured anisotropy values were normalized using **10** as a positive control and plotted against logarithmic compound concentration. To obtain  $\text{EC}_{50}$  values, the resulting curve was fitted to a four-parameter logistic model (4PL) using GraphPad Prism 5.03 for Windows (GraphPad Software, La Jolla, CA).



**Table S2. Summary of the transformants in this study.**

| Transformants            | plasmids             |                              |                     |
|--------------------------|----------------------|------------------------------|---------------------|
|                          | <i>AdeA</i>          | <i>ArgB</i>                  | <i>sC</i>           |
| <i>AO-abnABCDE</i>       | pAdeA2- <i>abnAB</i> | pUARA2- <i>abnCD</i>         | pUSA2- <i>abnE</i>  |
| <i>AO-ctyA</i>           | pAdeA2- <i>ctyA</i>  |                              |                     |
| <i>AO-ctyB</i>           | pAdeA2- <i>ctyB</i>  |                              |                     |
| <i>AO-ctyF</i>           | pAdeA2- <i>ctyF</i>  |                              |                     |
| <i>AO-ctyBD</i>          | pAdeA2- <i>ctyBD</i> |                              |                     |
| <i>AO-ctyBDE</i>         | pAdeA2- <i>ctyBD</i> |                              | pUSA2- <i>ctyE</i>  |
| <i>AO-ctyBDEJ</i>        | pAdeA2- <i>ctyBD</i> |                              | pUSA2- <i>ctyEJ</i> |
| <i>AO-ctyABDEJ</i>       | pAdeA2- <i>ctyBD</i> | pUARA2- <i>ctyA</i>          | pUSA2- <i>ctyEJ</i> |
| <i>AO-ctyABDJ</i>        | pAdeA2- <i>ctyBD</i> | pUARA2- <i>ctyAJ</i>         |                     |
| <i>AO-ctyABDPa-orf11</i> | pAdeA2- <i>ctyBD</i> | pUARA2- <i>ctyA-Pa-orf11</i> |                     |

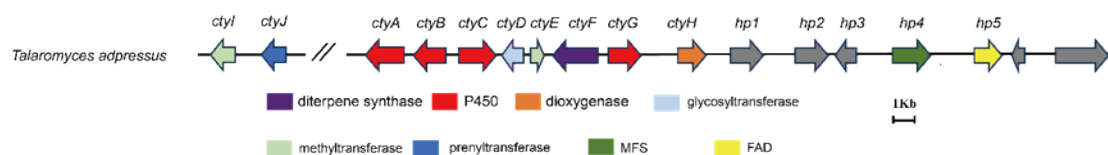

**Table S3. Comparative analysis of gene clusters of *ctj*, *orf*, *abn*.**

| Gene        | corresponding <i>Pa</i> gene<br>(UniProtKB/identity %) | corresponding <i>abn</i><br>gene (identity %) | Predicted function                            |
|-------------|--------------------------------------------------------|-----------------------------------------------|-----------------------------------------------|
| <i>ctjA</i> | <i>Pa-orf12</i> (LOMYS8/30.8%)                         | <i>abnK</i> (23.5%)                           | P450                                          |
| <i>ctjB</i> | <i>Pa-orf7</i> (LOMYS5/54.0%)                          |                                               | P450                                          |
| <i>ctjC</i> | <i>Pa-orf5</i> (LON063/67.1%)                          | <i>abnB</i> (63.0%)                           | P450                                          |
| <i>ctjD</i> | <i>Pa-orf6</i> (LOMZK0/54.3%)                          |                                               | <i>O</i> -glycosyltransferase                 |
| <i>ctjE</i> |                                                        |                                               | Methyltransferase                             |
| <i>ctjF</i> | <i>Pa-orf1</i> (A2PZA5/55.8%)                          | <i>abnA</i> (47.2%)                           | Fusicoccadiene synthase                       |
| <i>ctjG</i> | <i>Pa-orf3</i> (LOMXJ1/60.8%)                          | <i>abnC</i> (51.5%)                           | P450                                          |
| <i>ctjH</i> | <i>Pa-orf2</i> (EOD7H6/51.9%)                          | <i>abnD</i> (61.4%)                           | Alpha-ketoglutarate-<br>dependent dioxygenase |
| <i>ctjI</i> | <i>Pa-orf8</i> (LOMXX3/24.8%)                          | <i>abnE</i> (53.9%)                           | <i>O</i> -methyltransferase                   |
| <i>ctjJ</i> | <i>Pa-orf11</i> (H7CE84/43.4%)                         |                                               | <i>O</i> -glucose<br>prenyltransferase        |
| <i>hp1</i>  |                                                        |                                               | Manganese transporter                         |
| <i>hp2</i>  |                                                        |                                               | Arylsulfotransferase                          |
| <i>hp3</i>  |                                                        |                                               | No hits                                       |
| <i>hp4</i>  |                                                        |                                               | MFS                                           |
| <i>hp5</i>  |                                                        |                                               | FAD binding                                   |

Our group identified the *abn* BGC previously<sup>7</sup>.

Table S4. NMR data of compound **7** in CDCl<sub>3</sub>.

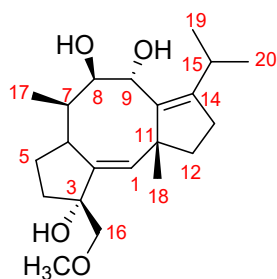

| No. | <b>7</b>                                                   |                            |
|-----|------------------------------------------------------------|----------------------------|
|     | $\delta_{\text{H}}$ , mult, ( <i>J</i> in Hz)              | $\delta_{\text{C}}$ , type |
| 1   | 5.51, d, (2.6)                                             | 134.4, CH                  |
| 2   |                                                            | 139.7, C                   |
| 3   |                                                            | 82.1, C                    |
| 4   | 1.27-1.33, m<br>1.92-2.03, m                               | 31.7, CH <sub>2</sub>      |
| 5   | 1.92-2.03, m                                               | 35.4, CH <sub>2</sub>      |
| 6   | 2.93, td, (8.6, 2.6)                                       | 40.3, CH                   |
| 7   | 1.41, m                                                    | 41.7, CH                   |
| 8   | 3.93, dd, (10.0, 4.4)                                      | 77.4, CH                   |
| 9   | 4.06, d, (10.0)                                            | 67.9, CH                   |
| 10  |                                                            | 136.9, C                   |
| 11  |                                                            | 51.9, C                    |
| 12  | 1.68, ddd, (12.0, 10.0 8.4)<br>1.84, ddd, (12.0, 6.9, 2.2) | 42.6, CH <sub>2</sub>      |
| 13  | 2.06-2.17, m                                               | 27.2, CH <sub>2</sub>      |
| 14  |                                                            | 150.5, C                   |
| 15  | 3.26, p, (6.8)                                             | 28.2, CH                   |
| 16  | 3.08, dd, (9.5, 1.3)<br>3.35, d, (9.5)                     | 77.6, CH <sub>2</sub>      |
| 17  | 0.8, d, (7.2)                                              | 8.5, CH <sub>3</sub>       |
| 18  | 1.21, s                                                    | 26.6, CH <sub>3</sub>      |
| 19  | 0.95, d, (6.9)                                             | 21.6, CH <sub>3</sub>      |
| 20  | 1.03, d, (6.7)                                             | 20.4, CH <sub>3</sub>      |
| OMe | 3.40, s                                                    | 59.4, CH <sub>3</sub>      |



Table S5. NMR data of compound 6 in CD<sub>3</sub>OD.

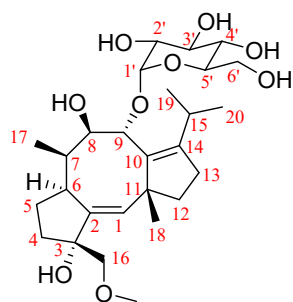

| No. | 6                                             |                            |
|-----|-----------------------------------------------|----------------------------|
|     | $\delta_{\text{H}}$ , mult, ( <i>J</i> in Hz) | $\delta_{\text{C}}$ , type |
| 1   | 5.49, d, (2.5)                                | 135.6, CH                  |
| 2   |                                               | 141.2, C                   |
| 3   |                                               | 83.3, C                    |
| 4   | 2.00, 1.38, m                                 | 32.6, CH <sub>2</sub>      |
| 5   | 1.96, 1.40, m                                 | 35.7, CH <sub>2</sub>      |
| 6   | 2.99, m                                       | 41.7, CH                   |
| 7   | 1.90, m                                       | 42.8, CH                   |
| 8   | 3.99, dd, (10.0, 4.2)                         | 78.5, CH                   |
| 9   | 3.89, d, (10.0)                               | 79.7, CH                   |
| 10  |                                               | 136.8, C                   |
| 11  |                                               | 53.1, C                    |
| 12  | 2.15, m                                       | 43.6, CH <sub>2</sub>      |
| 13  | 1.85, 1.67, m                                 | 27.5, CH <sub>2</sub>      |
| 14  |                                               | 150.7, C                   |
| 15  | 3.28, m                                       | 29.2, CH                   |
| 16  | 3.35, 3.11 d, (10.0)                          | 78.5, CH <sub>2</sub>      |
| 17  | 0.84, d, (7.2)                                | 9.0, CH <sub>3</sub>       |
| 18  | 1.26, s                                       | 26.9, CH <sub>3</sub>      |
| 19  | 1.10, d, (6.6)                                | 22.0, CH <sub>3</sub>      |
| 20  | 0.99, d, (6.9)                                | 20.9, CH <sub>3</sub>      |
| 1'  | 4.94, d, (3.8)                                | 103.6, CH                  |
| 2'  | 3.43, dd, (9.7,3.7)                           | 73.8, CH                   |
| 3'  | 3.69, m                                       | 75.0, CH                   |
| 4'  | 3.42, m                                       | 71.2, CH                   |
| 5'  | 3.73, m                                       | 73.7, CH                   |
| 6'  | 3.66, m                                       | 62.1, CH <sub>2</sub>      |
| OMe | 3.37, s                                       | 59.5, CH <sub>3</sub>      |

Table S6. NMR data of compound 5 in CD<sub>3</sub>OD and CD<sub>3</sub>COCD<sub>3</sub>.

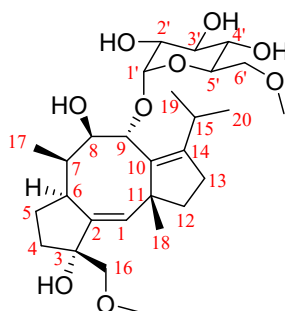

| No. | Reported <sup>8,9</sup>                                                            |                                                  | this work                                                                                                     |                                                                     |                                                  |
|-----|------------------------------------------------------------------------------------|--------------------------------------------------|---------------------------------------------------------------------------------------------------------------|---------------------------------------------------------------------|--------------------------------------------------|
|     | $\delta_{\text{H}}$ , mult, ( <i>J</i> in Hz)<br>CD <sub>3</sub> COCD <sub>3</sub> | $\delta_{\text{C}}$ , type<br>CD <sub>3</sub> OD | $\delta_{\text{H}}$ , mult, ( <i>J</i> in Hz)<br>CD <sub>3</sub> COCD <sub>3</sub> (match<br>the key signals) | $\delta_{\text{H}}$ , mult, ( <i>J</i> in Hz)<br>CD <sub>3</sub> OD | $\delta_{\text{C}}$ , type<br>CD <sub>3</sub> OD |
| 1   | 5.50, d, (2.5)                                                                     | 135.6, CH                                        | 5.51, d, (2.5)                                                                                                | 5.49, d, (2.5)                                                      | 135.6, CH                                        |
| 2   |                                                                                    | 141.2, C                                         |                                                                                                               |                                                                     | 141.2, C                                         |
| 3   |                                                                                    | 83.2, C                                          |                                                                                                               |                                                                     | 83.4, C                                          |
| 4   |                                                                                    | 32.3, CH <sub>2</sub>                            |                                                                                                               | 2.00, 1.38, m                                                       | 32.6, CH <sub>2</sub>                            |
| 5   |                                                                                    | 35.5, CH <sub>2</sub>                            |                                                                                                               | 1.96, 1.40, m                                                       | 35.7, CH <sub>2</sub>                            |
| 6   |                                                                                    | 41.4, CH                                         |                                                                                                               | 2.99, m                                                             | 41.7, CH                                         |
| 7   |                                                                                    | 42.5, CH                                         |                                                                                                               | 1.90, m                                                             | 42.8, CH                                         |
| 8   |                                                                                    | 79.0, CH                                         |                                                                                                               | 3.99, dd, (10.0, 4.2)                                               | 78.9, CH                                         |
| 9   |                                                                                    | 79.6, CH                                         |                                                                                                               | 3.89, d, (10.0)                                                     | 79.7, CH                                         |
| 10  |                                                                                    | 137.8, C                                         |                                                                                                               |                                                                     | 136.7, C                                         |
| 11  |                                                                                    | 53.1, C                                          |                                                                                                               |                                                                     | 53.1, C                                          |
| 12  |                                                                                    | 43.3, CH <sub>2</sub>                            |                                                                                                               | 2.15, m                                                             | 43.6, CH <sub>2</sub>                            |
| 13  |                                                                                    | 27.0, CH <sub>2</sub>                            |                                                                                                               | 1.85, 1.67, m                                                       | 27.5, CH <sub>2</sub>                            |
| 14  |                                                                                    | 150.2, C                                         |                                                                                                               |                                                                     | 150.7, C                                         |
| 15  |                                                                                    | 28.5, CH                                         |                                                                                                               | 3.28, m                                                             | 29.2, CH                                         |
| 16  |                                                                                    | 78.5, CH <sub>2</sub>                            |                                                                                                               | 3.35, 3.11 d, (10.0)                                                | 78.1, CH <sub>2</sub>                            |
| 17  |                                                                                    | 8.7, CH <sub>3</sub>                             |                                                                                                               | 0.84, d, (7.2)                                                      | 8.9, CH <sub>3</sub>                             |
| 18  | 1.27, s                                                                            | 26.1, CH <sub>3</sub>                            | 1.28, s                                                                                                       | 1.26, s                                                             | 26.6, CH <sub>3</sub>                            |
| 19  | 1.01, d, (6.5)                                                                     | 21.5, CH <sub>3</sub>                            | 1.08, s                                                                                                       | 1.10, d, (6.6)                                                      | 22.0, CH <sub>3</sub>                            |
| 20  | 0.94, d, (6.5)                                                                     | 20.6, CH <sub>3</sub>                            | 0.96, s                                                                                                       | 0.99, d, (6.9)                                                      | 20.9, CH <sub>3</sub>                            |
| 1'  | 4.91, d, (3.5)                                                                     | 103.5, CH                                        | 4.90, d, (3.5)                                                                                                | 4.90, d, (3.8)                                                      | 103.7, CH                                        |
| 2'  |                                                                                    | 73.4, CH                                         |                                                                                                               | 3.43, dd, (9.7, 3.8)                                                | 72.9, CH                                         |
| 3'  |                                                                                    | 75.2, CH                                         |                                                                                                               | 3.69, t, (9.3)                                                      | 75.0, CH                                         |
| 4'  |                                                                                    | 71.7, CH                                         |                                                                                                               | 3.34, m                                                             | 71.5, CH                                         |
| 5'  |                                                                                    | 72.7, CH                                         |                                                                                                               | 3.77, m                                                             | 72.8, CH                                         |
| 6'  |                                                                                    | 73.4, CH <sub>2</sub>                            |                                                                                                               | 3.59, dd, (10.6, 4.5)<br>3.52, dd, (10.8, 2.3)                      | 73.7, CH <sub>2</sub>                            |
| OMe | 3.33, s                                                                            | 59.6, CH <sub>3</sub>                            | 3.34, s                                                                                                       | 3.37, s                                                             | 59.5, CH <sub>3</sub>                            |
|     | 3.27, s                                                                            | 59.6, CH <sub>3</sub>                            | 3.28, s                                                                                                       | 3.34, s                                                             | 59.5, CH <sub>3</sub>                            |

5: <sup>1</sup>H NMR (600 MHz, Acetone-*d*<sub>6</sub>)  $\delta$  5.51 (d, *J* = 2.5 Hz, 1H), 4.90 (d, *J* = 3.8 Hz, 1H), 3.93 (dd, *J* = 10.0, 4.1 Hz, 1H), 3.85 (d, *J* = 10.0 Hz, 1H), 3.79 (m 1H), 3.74 (t, *J* = 9.2 Hz, 1H), 3.53 (m, 2H), 3.44

(m, 2H), 3.38 (d,  $J = 9.9$  Hz, 1H), 3.34 (s, 3H), 3.32 (m, 1H), 3.28 (s 3H), 3.05 (dd,  $J = 9.9, 1.1$  Hz, 1H), 2.97 (td,  $J = 8.6, 2.5$  Hz, 1H), 2.09, (m, 2H), 1.90-1.96(m,3H), 1.78 (m, 1H), 1.70 (m, 1H), 1.32 (m, 2H), 1.28 (s, 3H), 1.08 (d,  $J = 6.7$  Hz, 3H), 0.96 (d,  $J = 6.9$  Hz, 3H), 0.83 (d,  $J = 7.2$  Hz, 3H).

Table S7. NMR data of compound 4 in CD<sub>3</sub>OD.

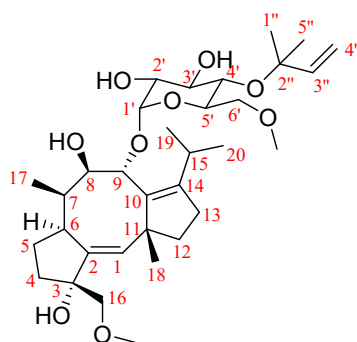

| No. | Reported <sup>9</sup><br>$\delta_C$ , type | this work                            |                       |
|-----|--------------------------------------------|--------------------------------------|-----------------------|
|     |                                            | $\delta_H$ , mult, ( <i>J</i> in Hz) | $\delta_C$ , type     |
| 1   | 135.3, CH                                  | 5.48, d, (2.5)                       | 135.5, CH             |
| 2   | 141.4, C                                   |                                      | 141.2, C              |
| 3   | 83.2, C                                    |                                      | 83.4, C               |
| 4   | 32.5, CH <sub>2</sub>                      | 2.00, m<br>1.38, m                   | 32.6, CH <sub>2</sub> |
| 5   | 35.7, CH <sub>2</sub>                      | 1.96, m<br>1.40, m                   | 35.7, CH <sub>2</sub> |
| 6   | 41.6, CH                                   | 2.99, m                              | 41.7, CH              |
| 7   | 42.6, CH                                   | 1.90, m                              | 42.8, CH              |
| 8   | 78.7, CH                                   | 3.97, dd, (10.0, 4.2)                | 78.8, CH              |
| 9   | 79.5, CH                                   | 3.86, d, (10.0)                      | 79.6, CH              |
| 10  | 136.5, C                                   |                                      | 136.7, C              |
| 11  | 53.0, C                                    |                                      | 53.1, C               |
| 12  | 43.6, CH <sub>2</sub>                      | 2.15, m                              | 43.7, CH <sub>2</sub> |
| 13  | 27.4, CH <sub>2</sub>                      | 1.85, m<br>1.67, m                   | 27.5, CH <sub>2</sub> |
| 14  | 150.5, C                                   |                                      | 150.7, C              |
| 15  | 29.1, CH                                   | 3.28, m                              | 29.2, CH              |
| 16  | 77.3, CH <sub>2</sub>                      | 3.35, d, (10.0)<br>3.11, d, (10.0)   | 77.4, CH <sub>2</sub> |
| 17  | 9.0, CH <sub>3</sub>                       | 0.84, d, (7.2)                       | 9.0, CH <sub>3</sub>  |
| 18  | 26.7, CH <sub>3</sub>                      | 1.26, s                              | 26.7, CH <sub>3</sub> |
| 19  | 21.9, CH <sub>3</sub>                      | 1.10, d, (6.6)                       | 21.9, CH <sub>3</sub> |
| 20  | 21.1, CH <sub>3</sub>                      | 0.98, d, (6.9)                       | 21.1, CH <sub>3</sub> |
| 1'  | 103.2, CH                                  | 4.87, d, (3.8)                       | 103.3, CH             |
| 2'  | 72.7, CH                                   | 3.39, m                              | 72.8, CH              |
| 3'  | 73.6, CH                                   | 3.63, m                              | 73.8, CH              |
| 4'  | 74.9, CH                                   | 3.35, m                              | 75.0, CH              |
| 5'  | 72.7, CH                                   | 3.70, m                              | 72.8, CH              |
| 6'  | 72.1, CH <sub>2</sub>                      | 3.62, 3.51, m                        | 72.2, CH <sub>2</sub> |
| 1'' | 27.6, CH <sub>3</sub>                      | 1.32, s                              | 27.6, CH <sub>3</sub> |
| 2'' | 78.0, C                                    |                                      | 78.1, C               |

|     |                        |                                                |                        |
|-----|------------------------|------------------------------------------------|------------------------|
| 3'' | 146.4, CH              | 6.05, dd, (17.5, 10.8)                         | 146.6, CH              |
| 4'' | 112.8, CH <sub>2</sub> | 5.12, dd, (17.5, 1.4)<br>5.01, dd, (10.9, 1.4) | 112.8, CH <sub>2</sub> |
| 5'' | 27.9, CH <sub>3</sub>  | 1.31, s                                        | 27.9, CH <sub>3</sub>  |
| OMe | 59.5, CH <sub>3</sub>  | 3.37, s                                        | 59.5, CH <sub>3</sub>  |
|     | 59.1, CH <sub>3</sub>  | 3.30, s                                        | 59.1, CH <sub>3</sub>  |

---

**Table S8. NMR data of compound 3 in CD<sub>3</sub>OD and CD<sub>3</sub>COCD<sub>3</sub>.**

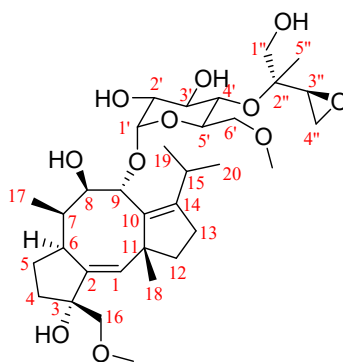

| No. | Reported <sup>9, 10</sup>                                                          |                                                  | this work                                                                                                     |                                                                     |                                                  |
|-----|------------------------------------------------------------------------------------|--------------------------------------------------|---------------------------------------------------------------------------------------------------------------|---------------------------------------------------------------------|--------------------------------------------------|
|     | $\delta_{\text{H}}$ , mult, ( <i>J</i> in Hz)<br>CD <sub>3</sub> COCD <sub>3</sub> | $\delta_{\text{C}}$ , type<br>CD <sub>3</sub> OD | $\delta_{\text{H}}$ , mult, ( <i>J</i> in Hz)<br>CD <sub>3</sub> COCD <sub>3</sub> (match<br>the key signals) | $\delta_{\text{H}}$ , mult, ( <i>J</i> in Hz)<br>CD <sub>3</sub> OD | $\delta_{\text{C}}$ , type<br>CD <sub>3</sub> OD |
| 1   | 5.56, d, (2.5)                                                                     | 135.6, CH                                        | 5.51, d, (2.6)                                                                                                | 5.49, d, (2.5)                                                      | 135.4, CH                                        |
| 2   |                                                                                    | 141.5, C                                         |                                                                                                               |                                                                     | 141.3, C                                         |
| 3   |                                                                                    | 83.4, C                                          |                                                                                                               |                                                                     | 83.4, C                                          |
| 4   |                                                                                    | 32.7, CH <sub>2</sub>                            |                                                                                                               | 1.30, 1.94, m                                                       | 32.6, CH <sub>2</sub>                            |
| 5   |                                                                                    | 35.9, CH <sub>2</sub>                            |                                                                                                               | 1.37, 2.00, m                                                       | 35.7, CH <sub>2</sub>                            |
| 6   |                                                                                    | 41.7, CH                                         |                                                                                                               | 2.98, m                                                             | 41.7, CH                                         |
| 7   |                                                                                    | 42.8, CH                                         |                                                                                                               | 1.89, m                                                             | 42.7, CH                                         |
| 8   |                                                                                    | 79.1, CH                                         |                                                                                                               | 3.97, dd, (10.0, 4.2)                                               | 79.0, CH                                         |
| 9   |                                                                                    | 79.7, CH                                         |                                                                                                               | 3.86, d, (10.1)                                                     | 79.6, CH                                         |
| 10  |                                                                                    | 137.0, C                                         |                                                                                                               |                                                                     | 136.7, C                                         |
| 11  |                                                                                    | 53.2, C                                          |                                                                                                               |                                                                     | 53.1, C                                          |
| 12  |                                                                                    | 43.7, CH <sub>2</sub>                            |                                                                                                               | 1.67, 1.88, m                                                       | 43.7, CH <sub>2</sub>                            |
| 13  |                                                                                    | 27.5, CH <sub>2</sub>                            |                                                                                                               | 2.08-2.20, m                                                        | 27.5, CH <sub>2</sub>                            |
| 14  |                                                                                    | 150.8, C                                         |                                                                                                               |                                                                     | 150.7, C                                         |
| 15  |                                                                                    | 29.1, CH                                         |                                                                                                               | 3.28, m                                                             | 29.2, CH                                         |
| 16  |                                                                                    | 78.2, CH <sub>2</sub>                            |                                                                                                               | 3.36, d, (10.0)<br>3.11, d, (10.0)                                  | 78.0, CH <sub>2</sub>                            |
| 17  | 0.83,                                                                              | 9.0, CH <sub>3</sub>                             | 0.83, d (7.2)                                                                                                 | 0.84, d, (7.2)                                                      | 8.9, CH <sub>3</sub>                             |
| 18  | 1.26, s                                                                            | 26.8, CH <sub>3</sub>                            | 1.26, s                                                                                                       | 1.25, s                                                             | 26.8, CH <sub>3</sub>                            |
| 19  | 1.09                                                                               | 21.9, CH <sub>3</sub>                            | 1.09, d, (6.6)                                                                                                | 1.10, d, (6.6)                                                      | 21.8, CH <sub>3</sub>                            |
| 20  | 0.97                                                                               | 21.1, CH <sub>3</sub>                            | 0.97, d, (6.9)                                                                                                | 0.99, d, (6.9)                                                      | 21.0, CH <sub>3</sub>                            |
| 1'  | 4.94, d, (3.0)                                                                     | 103.4, CH                                        | 4.88, d, (3.8)                                                                                                | 4.86, d, (4.0)                                                      | 103.4, CH                                        |
| 2'  |                                                                                    | 72.5, CH                                         |                                                                                                               | 3.61, m                                                             | 72.5, CH                                         |
| 3'  |                                                                                    | 73.7, CH                                         |                                                                                                               | 3.44, dd, (9.7, 3.8)                                                | 73.5, CH                                         |
| 4'  |                                                                                    | 75.4, CH                                         |                                                                                                               | 3.75, m                                                             | 75.4, CH                                         |
| 5'  |                                                                                    | 72.5, CH                                         |                                                                                                               | 3.68, m                                                             | 72.4, CH                                         |
| 6'  |                                                                                    | 71.7, CH <sub>2</sub>                            |                                                                                                               | 3.36, 3.74, m                                                       | 71.5, CH <sub>2</sub>                            |
| 1'' |                                                                                    | 67.9, CH <sub>2</sub>                            |                                                                                                               | 3.56, 3.60, m                                                       | 67.9, CH <sub>2</sub>                            |
| 2'' |                                                                                    | 78.2, C                                          |                                                                                                               |                                                                     | 78.1, C                                          |
| 3'' | 2.4-3.1, m                                                                         | 57.3, CH                                         | 2.95, dd, (4.0, 2.7)                                                                                          | 2.98, m                                                             | 57.3, CH                                         |

|     |            |                       |                                              |                                              |                       |
|-----|------------|-----------------------|----------------------------------------------|----------------------------------------------|-----------------------|
| 4'' | 2.4-3.1, m | 44.5, CH <sub>2</sub> | 2.60, dd, (5.6, 4.0)<br>2.78, dd, (5.6, 2.7) | 2.81, dd, (5.6, 2.7)<br>2.66, dd, (5.5, 4.1) | 44.5, CH <sub>2</sub> |
| 5'' | 1.17, s    | 16.6, CH <sub>3</sub> | 1.16, s                                      | 1.20, s                                      | 16.6, CH <sub>3</sub> |
| OMe | 3.37       | 59.6, CH <sub>3</sub> | 3.34, s                                      | 3.37, s                                      | 59.5, CH <sub>3</sub> |
|     | 3.31       | 59.3, CH <sub>3</sub> | 3.28, s                                      | 3.32, s                                      | 59.2, CH <sub>3</sub> |

**3:** <sup>1</sup>H NMR (600 MHz, Acetone-*d*<sub>6</sub>) δ 5.51 (d, *J* = 2.6 Hz, 1H), 4.88 (d, *J* = 3.8 Hz, 1H), 3.92 (dd, *J* = 10.0, 4.2 Hz, 1H), 3.86 – 3.77 (m, 2H), 3.72 – 3.65 (m, 2H), 3.63 – 3.57 (m, 2H), 3.54 – 3.46 (m, 2H), 3.38 (d, *J* = 9.8 Hz, 1H), 3.38 (m, 1H) 3.34 (s, 3H), 3.28 (s, 3H), 3.28 (m, 1H), 3.05 (d, *J* = 9.9 Hz, 1H), 2.95 (dd, *J* = 4.0, 2.7 Hz, 2H), 2.78 (dd, *J* = 5.6, 2.6 Hz, 1H), 2.60 (dd, *J* = 5.6, 4.0 Hz, 1H), 2.14 – 2.07 (m, 2H), 2.01 – 1.86 (m, 3H), 1.84 – 1.75 (m, 1H), 1.73 – 1.62 (m, 1H), 1.38 – 1.28 (m, 2H), 1.26 (s, 3H), 1.16 (s, 3H), 1.09 (d, *J* = 6.7 Hz, 3H), 0.97 (d, *J* = 6.9 Hz, 3H), 0.83 (d, *J* = 7.2 Hz, 3H).

Table S9. NMR data of compound 2 in CD<sub>3</sub>OD and CD<sub>3</sub>COCD<sub>3</sub>.

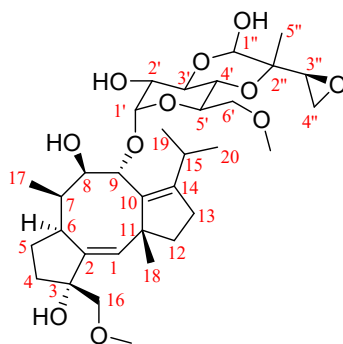

| No. | Reported <sup>8,9</sup>                                                            |                                                  | this work                                                                                                     |                                                                     |                                                  |
|-----|------------------------------------------------------------------------------------|--------------------------------------------------|---------------------------------------------------------------------------------------------------------------|---------------------------------------------------------------------|--------------------------------------------------|
|     | $\delta_{\text{H}}$ , mult, ( <i>J</i> in Hz)<br>CD <sub>3</sub> COCD <sub>3</sub> | $\delta_{\text{C}}$ , type<br>CD <sub>3</sub> OD | $\delta_{\text{H}}$ , mult, ( <i>J</i> in Hz)<br>CD <sub>3</sub> COCD <sub>3</sub> (match the key<br>signals) | $\delta_{\text{H}}$ , mult, ( <i>J</i> in Hz)<br>CD <sub>3</sub> OD | $\delta_{\text{C}}$ , type<br>CD <sub>3</sub> OD |
| 1   | 5.57, d, (2.5)                                                                     | 135.5, CH                                        | 5.51, d, (2.5)                                                                                                | 5.48, d, (2.5)                                                      | 135.5, CH                                        |
| 2   |                                                                                    | 141.1, C                                         |                                                                                                               |                                                                     | 141.1, C                                         |
| 3   |                                                                                    | 83.4, C                                          |                                                                                                               |                                                                     | 83.2, C                                          |
| 4   |                                                                                    | 32.7, CH <sub>2</sub>                            |                                                                                                               | 1.30, 1.94, m                                                       | 32.6, CH <sub>2</sub>                            |
| 5   |                                                                                    | 35.8, CH <sub>2</sub>                            |                                                                                                               | 1.37, 2.00, m                                                       | 35.7, CH <sub>2</sub>                            |
| 6   |                                                                                    | 41.7, CH                                         |                                                                                                               | 2.98, m                                                             | 41.7, CH                                         |
| 7   |                                                                                    | 42.7, CH                                         |                                                                                                               | 1.89, m                                                             | 42.7, CH                                         |
| 8   |                                                                                    | 79.0, CH                                         |                                                                                                               | 3.88, d, (10.1)                                                     | 79.0, CH                                         |
| 9   |                                                                                    | 79.8, CH                                         |                                                                                                               | 3.98, dd, (10.1, 4.2)                                               | 79.7, CH                                         |
| 10  |                                                                                    | 136.7, C                                         |                                                                                                               |                                                                     | 136.7, C                                         |
| 11  |                                                                                    | 53.2, C                                          |                                                                                                               |                                                                     | 53.1, C                                          |
| 12  |                                                                                    | 43.8, CH <sub>2</sub>                            |                                                                                                               | 1.70, 1.87, m                                                       | 43.7, CH <sub>2</sub>                            |
| 13  |                                                                                    | 27.6, CH <sub>2</sub>                            |                                                                                                               | 2.14, m                                                             | 27.5, CH <sub>2</sub>                            |
| 14  |                                                                                    | 150.6, C                                         |                                                                                                               |                                                                     | 150.6, C                                         |
| 15  |                                                                                    | 29.3, CH                                         |                                                                                                               | 3.30, m                                                             | 29.2, CH                                         |
| 16  |                                                                                    | 78.1, CH <sub>2</sub>                            |                                                                                                               | 3.36, 3.11, d, (10.0)                                               | 78.1, CH <sub>2</sub>                            |
| 17  | 0.83                                                                               | 9.1, CH <sub>3</sub>                             | 0.83, d, (7.2)                                                                                                | 0.83, d, (7.2)                                                      | 8.9, CH <sub>3</sub>                             |
| 18  | 1.27                                                                               | 26.6, CH <sub>3</sub>                            | 1.27, s                                                                                                       | 1.26, s                                                             | 26.5, CH <sub>3</sub>                            |
| 19  | 1.08                                                                               | 22.1, CH <sub>3</sub>                            | 1.12, d, (6.6)                                                                                                | 1.13, d, (6.6)                                                      | 22.2, CH <sub>3</sub>                            |
| 20  | 0.96                                                                               | 21.2, CH <sub>3</sub>                            | 0.98, d, (6.6)                                                                                                | 1.01, d, (7.0)                                                      | 21.0, CH <sub>3</sub>                            |
| 1'  | 4.99, d, (3.0)                                                                     | 103.6, CH                                        | 4.94, d, (3.0)                                                                                                | 4.93, d, (3.6)                                                      | 103.6, CH                                        |
| 2'  |                                                                                    | 71.2, CH                                         |                                                                                                               | 3.81, m                                                             | 71.2, CH                                         |
| 3'  |                                                                                    | 77.9, CH                                         |                                                                                                               | 3.73, t, (9.5)                                                      | 77.9, CH                                         |
| 4'  |                                                                                    | 70.8, CH                                         |                                                                                                               | 3.69, dd, (10.0, 3.5)                                               | 70.8, CH                                         |
| 5'  |                                                                                    | 68.1, CH                                         |                                                                                                               | 3.40, t, (9.5)                                                      | 68.1, CH                                         |
| 6'  |                                                                                    | 72.0, CH <sub>2</sub>                            |                                                                                                               | 3.46, m                                                             | 71.9, CH <sub>2</sub>                            |
| 1'' | 4.78, d, (6.0)                                                                     | 97.2, CH                                         | 4.75, s                                                                                                       | 4.71, s                                                             | 97.2, CH                                         |
| 2'' |                                                                                    | 75.4, C                                          |                                                                                                               |                                                                     | 75.4, C                                          |
| 3'' | 2.4-3.1, m                                                                         | 57.1, CH                                         | 2.97, dd, (4.1, 2.6)                                                                                          | 3.03, m                                                             | 57.1, CH                                         |
| 4'' | 2.4-3.1, m                                                                         | 44.1, CH <sub>2</sub>                            | 2.58, 2.77, m                                                                                                 | 2.66, 2.83, m                                                       | 43.9, CH <sub>2</sub>                            |



|     |         |                       |         |         |                       |
|-----|---------|-----------------------|---------|---------|-----------------------|
| 5'' | 1.27    | 13.3, CH <sub>3</sub> | 1.26, s | 1.29, s | 13.1, CH <sub>3</sub> |
| OMe | 3.37, s | 59.8, CH <sub>3</sub> | 3.34, s | 3.37, s | 59.7, CH <sub>3</sub> |
|     | 3.29, s | 59.7, CH <sub>3</sub> | 3.27, s | 3.32, s | 59.5, CH <sub>3</sub> |

**2:** <sup>1</sup>H NMR (600 MHz, Acetone-*d*<sub>6</sub>) δ 5.51 (d, *J* = 2.5 Hz, 1H), 4.94 (d, *J* = 3.1 Hz, 1H), 4.75 (s, 1H), 3.94 (dd, *J* = 10.1, 3.9 Hz, 1H), 3.89 – 3.79 (m, 2H), 3.76 – 3.70 (m, 1H), 3.52 – 3.39 (m, 3H), 3.37 (m, 2H), 3.34 (s, 3H), 3.32 – 3.29 (m, 1H), 3.27 (s, 3H), 3.07 – 3.02 (m, 1H), 2.97 (m, 2H), 2.77 (ddd, *J* = 13.3, 5.6, 2.7 Hz, 1H), 2.58 (ddd, *J* = 13.0, 5.7, 4.1 Hz, 1H), 2.12 – 2.07 (m, 2H), 1.94 (m, 3H), 1.78 (m, 1H), 1.74 – 1.65 (m, 1H), 1.38 – 1.29 (m, 2H), 1.27 (s, 3H), 1.26 (s, 3H), 1.12 (d, *J* = 6.6 Hz, 3H), 0.98 (d, *J* = 6.7 Hz, 3H), 0.83 (d, *J* = 7.2 Hz, 3H).

**Table S10. NMR data of compound 12 in CD<sub>3</sub>OD.**

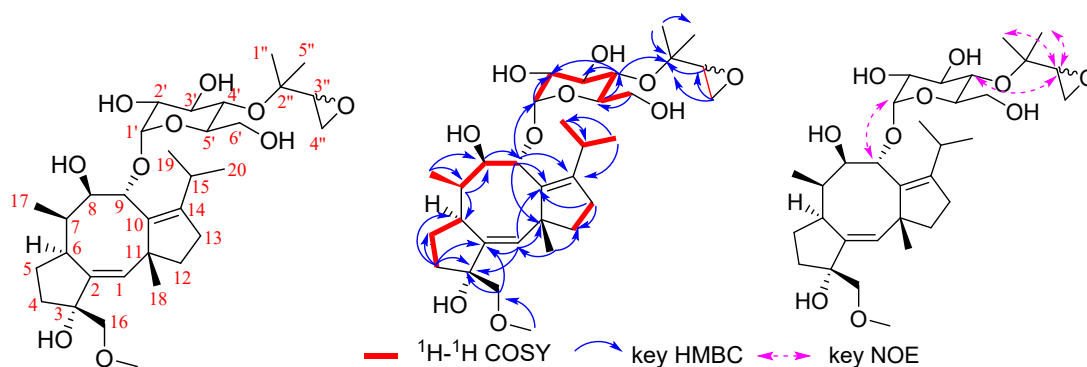

| No. | <b>12</b>                            |                       |                           |                       |
|-----|--------------------------------------|-----------------------|---------------------------|-----------------------|
|     | $\delta_H$ , mult, ( <i>J</i> in Hz) | $\delta_C$ , type     | Key HMBC correlations     | Key COSY correlations |
| 1   | 5.49, d, (2.5)                       | 135.5, CH             | C2, C3, C6, C10, C18      | H6                    |
| 2   |                                      | 141.3, C              |                           |                       |
| 3   |                                      | 83.4, C               |                           |                       |
| 4   | 2.00, m<br>1.38, m                   | 35.7, CH <sub>2</sub> | C2, C3, C6, C16           | H5                    |
| 5   | 1.96, m<br>1.40, m                   | 32.6, CH <sub>2</sub> | C2, C3, C4, C6            | H4                    |
| 6   | 2.99, td, (8.5, 2.5)                 | 41.7, CH              | C2, C5, C7, C8, C17       | H1, H5                |
| 7   | 1.90, m                              | 42.8, CH              | C2, C5, C6, C8, C17       | H8, H17               |
| 8   | 3.97, dd, (10.0, 4.3)                | 79.7, CH              | C7, C9, C10, C17          | H7                    |
| 9   | 3.87, d, (10.0)                      | 78.6, CH              | C7, C8, C10, C11, C14 C1' | H8                    |
| 10  |                                      | 136.8, C              |                           |                       |
| 11  |                                      | 53.1, C               |                           |                       |
| 12  | 2.14, m                              | 27.5, CH <sub>2</sub> | C10, C11, C13, C14        | H13                   |
| 13  | 1.86, m<br>1.67, m                   | 43.7, CH <sub>2</sub> | C10, C11, C12, C14        | H12                   |
| 14  |                                      | 150.6, C              |                           |                       |
| 15  | 3.28, m                              | 29.2, CH              | C10, C14                  | H19, H20              |
| 16  | 3.36, d, (10.0)<br>3.11, d, (10.0)   | 78.1, CH <sub>2</sub> | C3, C4, OMe               |                       |
| 17  | 0.84, d, (7.2)                       | 9.0, CH <sub>3</sub>  | C7, C8                    | H7                    |
| 18  | 1.25, s                              | 26.9, CH <sub>3</sub> | C1, C10, C11, C12         |                       |
| 19  | 1.09, d, (6.6)                       | 21.8, CH <sub>3</sub> | C14, C15, C20             | H15                   |
| 20  | 0.99, d, (6.9)                       | 21.0, CH <sub>3</sub> | C14, C15, 19              | H15                   |
| 1'  | 4.91, d, (3.8)                       | 103.4, CH             | C9, C2'                   | H2'                   |
| 2'  | 3.42, m                              | 73.9, CH              |                           | H1', H3'              |
| 3'  | 3.66, m                              | 75.0, CH              | C2', C4'                  | H2'                   |
| 4'  | 3.66, m                              | 72.3, CH              | C5', C6', C2''            | H3'                   |
| 5'  | 3.61, m                              | 73.7, CH              | C3'                       | H4'                   |
| 6'  | 3.8, dd, (11.6, 2.7)<br>3.62, m      | 61.5, CH <sub>2</sub> | C5'                       | H5'                   |
| 1'' | 1.25, s                              | 24.0, CH <sub>3</sub> | C2'', C3'', C4'', C5''    |                       |

|     |                      |                       |                        |      |
|-----|----------------------|-----------------------|------------------------|------|
| 2'' |                      | 75.9, C               |                        |      |
| 3'' | 3.14, dd, (4.2, 2.9) | 59.1, CH              | C1'', C2'', C5''       | H4'' |
| 4'' | 2.70, dd, (5.1, 2.9) | 45.2, CH <sub>2</sub> | C2'', C3''             | H3'' |
|     | 2.67, dd, (5.1, 4.2) |                       |                        |      |
| 5'' | 1.24, s              | 23.8, CH <sub>3</sub> | C1'', C2'', C3'', C4'' |      |
| OMe | 3.37, s              | 59.5, CH <sub>3</sub> |                        |      |

---

**Table S11. NMR data of compound 9 in CD<sub>3</sub>OD.**

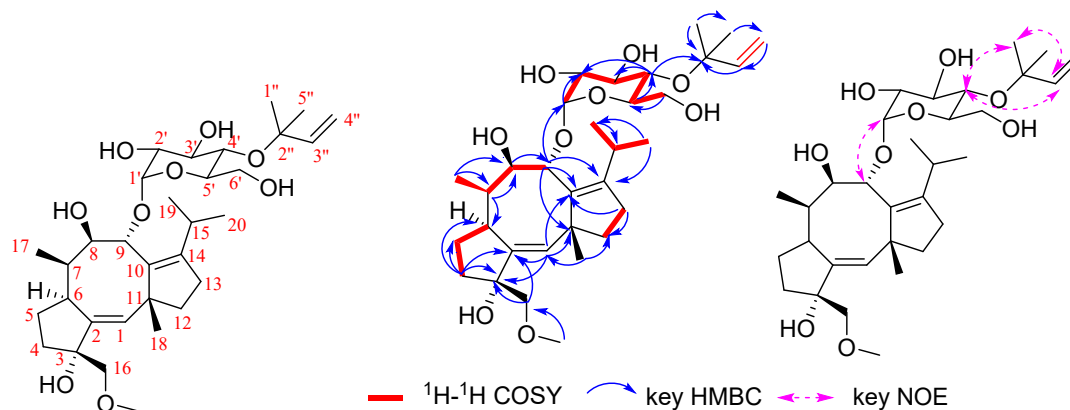

| No. | $\delta_H$ , mult, ( <i>J</i> in Hz) | $\delta_C$ , type     | Key HMBC correlations        | Key COSY correlations |
|-----|--------------------------------------|-----------------------|------------------------------|-----------------------|
| 1   | 5.49, d, (2.5)                       | 135.5, CH             | C2, C3, C6, C10, C18         | H6                    |
| 2   |                                      | 141.2, C              |                              |                       |
| 3   |                                      | 83.4, C               |                              |                       |
| 4   | 2.00, m<br>1.38, m                   | 35.7, CH <sub>2</sub> | C2, C3, C6, C16              | H5                    |
| 5   | 1.96, m<br>1.40, m                   | 32.6, CH <sub>2</sub> | C2, C3, C4, C6               | H4                    |
| 6   | 2.99, m                              | 41.7, CH              | C2, C5, C7, C8, C17          | H1, H5                |
| 7   | 1.90, m                              | 42.8, CH              | C2, C5, C6, C8, C17          | H8, H17               |
| 8   | 3.97, dd, (10.0, 4.2)                | 79.7, CH              | C7, C9, C10, C17             | H7                    |
| 9   | 3.88, d, (10.0)                      | 78.6, CH              | C7, C8, C10, C11, C14<br>C1' | H8                    |
| 10  |                                      | 136.7, C              |                              |                       |
| 11  |                                      | 53.1, C               |                              |                       |
| 12  | 2.15, m                              | 27.5, CH <sub>2</sub> | C10, C11, C13, C14           | H13                   |
| 13  | 1.85, m<br>1.67, m                   | 43.7, CH <sub>2</sub> | C10, C11, C12, C14           | H12                   |
| 14  |                                      | 150.7, C              |                              |                       |
| 15  | 3.28, m                              | 29.2, CH              | C10, C14                     | H19, H20              |
| 16  | 3.35, d, (10.0)<br>3.11, d, (10.0)   | 78.1, CH <sub>2</sub> | C3, C4, OMe                  |                       |
| 17  | 0.84, d, (7.2)                       | 9.0, CH <sub>3</sub>  | C7, C8                       | H7                    |
| 18  | 1.26, s                              | 26.9, CH <sub>3</sub> | C1, C10, C11, C12            |                       |
| 19  | 1.10, d, (6.6)                       | 21.9, CH <sub>3</sub> | C14, C15, C20                | H15                   |
| 20  | 0.98, d, (6.9)                       | 21.1, CH <sub>3</sub> | C14, C15, 19                 | H15                   |
| 1'  | 4.91, d, (3.8)                       | 103.3, CH             | C9, C2'                      | H2'                   |
| 2'  | 3.41, dd, (9.7, 3.8)                 | 73.9, CH              |                              | H1', H3'              |
| 3'  | 3.66, m                              | 75.0, CH              | C2', C4'                     | H2'                   |
| 4'  | 3.54, m                              | 72.6, CH              | C5', C6', C2''               | H3'                   |
| 5'  | 3.62, m                              | 73.9, CH              | C3'                          | H4'                   |
| 6'  | 3.72, dd, (11.9, 3.3)                | 61.5, CH <sub>2</sub> | C5'                          | H5'                   |

|     |                        |                        |                        |      |  |
|-----|------------------------|------------------------|------------------------|------|--|
|     | 3.63, m                |                        |                        |      |  |
| 1'' | 1.33, s                | 27.8, CH <sub>3</sub>  | C2'', C3'', C4'', C5'' |      |  |
| 2'' |                        | 77.4, C                |                        |      |  |
| 3'' | 6.09, dd, (17.5, 10.8) | 146.7, CH              | C1'', C2'', C5''       | H4'' |  |
| 4'' | 5.13, dd, (17.5, 1.4)  | 112.8, CH <sub>2</sub> | C2'', C3''             | H3'' |  |
|     | 5.01, dd, (10.9, 1.4)  |                        |                        |      |  |
| 5'' | 1.33, s                | 27.9, CH <sub>3</sub>  | C1'', C2'', C3'', C4'' |      |  |
| OMe | 3.37, s                | 59.5, CH <sub>3</sub>  |                        |      |  |

---

**Table S12. NMR data of compound 10 in CD<sub>3</sub>OD.**

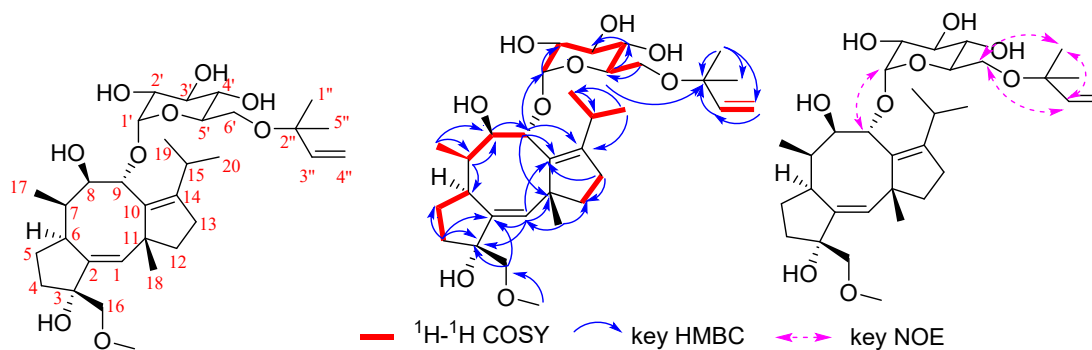

| No. | <b>10</b>                                     |                            |                              |                       |
|-----|-----------------------------------------------|----------------------------|------------------------------|-----------------------|
|     | $\delta_{\text{H}}$ , mult, ( <i>J</i> in Hz) | $\delta_{\text{C}}$ , type | Key HMBC correlations        | Key COSY correlations |
| 1   | 5.48, d, (2.5)                                | 135.5, CH                  | C2, C3, C10, C11, C18        | H6                    |
| 2   |                                               | 141.1, C                   |                              |                       |
| 3   |                                               | 83.3, C                    |                              |                       |
| 4   | 2.01, m<br>1.38, m                            | 35.7, CH <sub>2</sub>      | C2, C3, C5, C6               | H5                    |
| 5   | 1.96, m<br>1.33, m                            | 32.6, CH <sub>2</sub>      | C2, C3, C4, C6               | H4                    |
| 6   | 2.99, m                                       | 41.7, CH                   | C2, C5, C7, C8, C17          | H1, H5                |
| 7   | 1.90, m                                       | 42.8, CH                   | C2, C5, C6, C8, C17          | H8, H17               |
| 8   | 3.99, dd, (10.1, 4.2)                         | 79.7, CH                   | C7, C9, C10, C17             | H7                    |
| 9   | 3.88, d, (10.0)                               | 78.9, CH                   | C7, C8, C10, C11, C14<br>C1' | H8                    |
| 10  |                                               | 136.7, C                   |                              |                       |
| 11  |                                               | 53.2, C                    |                              |                       |
| 12  | 2.15, m                                       | 27.5, CH <sub>2</sub>      | C10, C11, C13, C14           | H13                   |
| 13  | 1.85, m<br>1.73, m                            | 43.6, CH <sub>2</sub>      | C10, C11, C12, C14           | H12                   |
| 14  |                                               | 150.6, C                   |                              |                       |
| 15  | 3.26, m                                       | 29.2, CH                   | C10, C14, C19, C20           | H19, H20              |
| 16  | 3.36, d, (10)<br>3.11, d, (10)                | 78.1, CH <sub>2</sub>      | C2, C3, C4, OMe              |                       |
| 17  | 0.84, d, (7.2)                                | 8.9, CH <sub>3</sub>       | C7, C8                       | H7                    |
| 18  | 1.28, s                                       | 27.0, CH <sub>3</sub>      | C10, C11, C12                |                       |
| 19  | 1.11, d, (6.6)                                | 22.0, CH <sub>3</sub>      | C14, C15, C20                | H15                   |
| 20  | 0.98, d, (6.9)                                | 21.0, CH <sub>3</sub>      | C14, C15, 19                 | H15                   |
| 1'  | 4.90, d, (3.8 Hz)                             | 103.71, CH                 | C9, C2', C3'                 | H2'                   |
| 2'  | 3.43, dd, (9.7, 3.9)                          | 73.7, CH                   |                              | H1'                   |
| 3'  | 3.69, t, (9.3)                                | 75.1, CH                   | C5'                          | H2'                   |
| 4'  | 3.29, m                                       | 72.2, CH                   | C3', C6'                     | H3'                   |
| 5'  | 3.75, m                                       | 73.0, CH                   | C4'                          | H4', H6'              |
| 6'  | 3.53, dd, (10.3, 2.7)<br>3.45, m              | 63.8, CH <sub>2</sub>      | C5', C2''                    | H5'                   |

|     |                       |                        |                        |      |
|-----|-----------------------|------------------------|------------------------|------|
| 1'' | 1.26, s               | 26.3, CH <sub>3</sub>  | C2'', C3'', C4'', C5'' |      |
| 2'' |                       | 76.7, C                |                        |      |
| 3'' | 5.84, dd (17.7, 10.9) | 145.1, CH              | C1'', C2'', C5''       | H4'' |
| 4'' | 5.16, dd, (17.7, 1.2) | 114.4, CH <sub>2</sub> | C2'', C3''             | H3'' |
|     | 5.10, dd, (10.9, 1.2) |                        |                        |      |
| 5'' | 1.26, s               | 26.3, CH <sub>3</sub>  | C1'', C2'', C3'', C4'' |      |
| OMe | 3.37, s               | 59.5, CH <sub>3</sub>  | C2, C4, C16            |      |

---

**Table S13. Gene sequences used in this work.**

| Gene name   | Sequence (5' to 3', with intron)                                                                                                                                                                                                                                                                                                                                                                                                                                                                                                                                                                                                                                                                                                                                                                                                                                                                                                                                                                                                                                                                                                                                                                                                                                                                                                                                                                                                                                                                                                                                                                                                                                                                                                                                                                                                                                                                                                                                                                                                                                                                                                                                                                                                   |
|-------------|------------------------------------------------------------------------------------------------------------------------------------------------------------------------------------------------------------------------------------------------------------------------------------------------------------------------------------------------------------------------------------------------------------------------------------------------------------------------------------------------------------------------------------------------------------------------------------------------------------------------------------------------------------------------------------------------------------------------------------------------------------------------------------------------------------------------------------------------------------------------------------------------------------------------------------------------------------------------------------------------------------------------------------------------------------------------------------------------------------------------------------------------------------------------------------------------------------------------------------------------------------------------------------------------------------------------------------------------------------------------------------------------------------------------------------------------------------------------------------------------------------------------------------------------------------------------------------------------------------------------------------------------------------------------------------------------------------------------------------------------------------------------------------------------------------------------------------------------------------------------------------------------------------------------------------------------------------------------------------------------------------------------------------------------------------------------------------------------------------------------------------------------------------------------------------------------------------------------------------|
| <b>CtyA</b> | <p>ATGTATCTTTTGATGATACTGGCGCTTGCCATCTACCATATAACGAGCAGTGTTTTGCTTCCCTT<br/> AACAACTTTGATACAGCTAAGAAGATTGGGCTTCCCATTGTTATTAGCCCAGTCTCGCGTATAAA<br/> CCCAGCATGGATGATCTTCCAAAAGCAGCTCGTGCCGCTATTAACCAAACCTACCCTTTGGACTAG<br/> GCTCCTTCACGAGGTACAATACTATGAATTGGTGGTTTATTGAGAAACATCGGATCCATCAACAA<br/> TATGGTAAAGTATTCATACACGTCTCGCCGGGGCTTAATGAGCTGCATTGTGCAGACCCATTTGT<br/> CAATCAGCAAATTTTTCAAGACGAAGGGACTTTGAAAAGCCGCCAAACCTCTTAAGTCAGTTGC<br/> ACAAGCCTGATCAAGTTCTTGGGGGAGTGAGTGGACTGACAATTAGCAGAAGCTACGAGAATC<br/> TACGGCGATAGCGTCACAACAGTATGTGTGCTATTTTCTTTGGTTTAAATAGCTTGTATGCA<br/> GAGAATTACTACTAACATATTCGAATTACTACTCCGCTAAAGGTCACGGGCCAGACTGGCAAC<br/> GCCACCGCGTATCACAACCTCCCGTTCAATGAGCGGAACAACAAGTTAGTTTGAATGAGGC<br/> TATTCGCCAAACAATTCAAGTGGGAGCATATTGGTGTGATCACGGATCAGCCGGTTTCAAACC<br/> GCTACTCAGGACTGGTCGACGGTAACGCTAAATATACTTGCAACCGCTGCACTTGGGGAGTCAT<br/> GGGACTTTCGCGGAATGTCAAATGGGCGAGAGTGAGAGCAACGCTGGGTCCGAGATGATG<br/> ACTTACCGCGATTCTCTTTACGCTAGCTGGCAACGTCCTGATGCTAGTTCTTACCCCGACTGG<br/> CTCTATTTCGGTTCCTCTCTCGTGGCTTCCCAATGGGCTTCGACAGTTTGTTCGCATACAAGCAG<br/> TTCGAACAGCACATGAAGCAGATGGTACAAAAGAAGAAGGAGCAAATTTCCAGGGGTGAGGCC<br/> GTGATGCTACACTCTTGAGCACGTGATTCTGAAATCTGAAGAATCGCGCCTTGACCAATCATC<br/> AGAATCACCAGCTAGCAATGGAAGTGTGACTAGGATAGGTGCTGCCAGTGTGGGTTATCGGAT<br/> GAAGAGTTATACGGTAATCTGTTTACTTACAATGTTGCGGGACATGAAACAACCGCCAGTACTCT<br/> GGGTTTTCCATGTACCTTCTAGCTGCATTTCCAAAACCTGGCAAACCTGGGTCTTGAAGAAGTCTG<br/> ATCTTATTTACGGACCCTATTGCAACACAAAGGACCTAGTCTATGAGGATGTATACCCTCGGTTA<br/> AAGCGCTGCCTCGCGATCATGGTATATGCCTTCTGCTTTGATTTGATCATGCTGCTCTATTTGTT<br/> ACTAACAACATTTGAAAAGTTGGAGACTCTCAGATTATATGGTCCTATACACAGCGTCTATAAAG<br/> CTACTATAGTGCTCACGGCCAGGATCTTGAATCGACGGCCGACTGTTACATCCCTCCGAAT<br/> ACCTATGTTCTTCCGAATATAATCGCCTCACATACGTTGCCGAATTCTGGGGTGACGACCATCT<br/> AGACTGGAACCCTAGCCGTTGGATTGAATCCGCTCCACCACCTCGAACACAACCTCAGTGACA<br/> AACCCGATCCTCAAAGCCAGGAGGTGAAGAGATACGTACCCCGCCAAAAGGAAAAGATACGT<br/> ACCTTCTTGGTGGGAGGTGGACGCGTCTGTCGGGCAGGAAGTTCTACAAGTCGAATTTGT<br/> CGCGGCAATCTCAGTCTGCTATGGGAATATGTAATTGAAGTCGTTCCCGTCCCGGACGAGAG<br/> ACTGTGCAAGAGGCCCGACAGAGGTGTCTCGCTGTCATTCAAGACAGCGAGTACAGATCACGC<br/> TGCAGATGAAGAACCCTACGTCTGTGAGGCTTAGGTTGATTAACGACAGCATTAA</p> |
| <b>CtyB</b> | <p>ATGCCAAACATTATGGCTTCCATGTATTACCTCGTGACGAGTCATGACTTTCAGCCGTGCCAGT<br/> CATTGCCGTCTCTTTGCCGACTTTGGTTCTCAAGCAAATACCTTTTTCATCTCTACAAGTTATCC<br/> TGCTTTCCCTGGTAAATGATGGGGGGTTTTTGGGATTTTCTCTACCAGAGCCCAGCAATGAATT<br/> CATTACGGACTGCGCTACCCTGATCCGCCGAGGCTTTTCCCTAGTCAGTGAGTCAACAAACAACA<br/> GAGAATCTTGATTGACTTGTGCAGAATCCAGATGCCTTCCGTGTCCGAACCGACTTCAACGAAGT<br/> CGTCGTTTTGGCCCCATATTTGCGCCGAGACAATTAGGGGCGAGCAACGACTCTCAGCGGGCATG<br/> TACACAGAAACTGTGGGTATTGGATCCTCTTGTTCATCCTGGCATTGACATGTGTTCTTAGGAG<br/> TTGATGGGTTATATCCAGGCTTTGAACCATTTGCATTTGCTGGGACACACCGCAATCTCTTACA<br/> CGATGTATCACATCTAGGTTGAACCGTGCCTTGCCTGAGCAGTTACATCGAGCCTGGACAGAA<br/> AAACCAAACCTAATTAACCTCGGATTGGTAGCAAAGATGGTCAATTATATTTCCGTCGAGGCAAC<br/> AGACTCTCTCAGGAGAAGTTGGACAAATGAAACCGGTTTGGTTGTTGTTTCCAAGTACGCAAT<br/> TTTGTGACCTAGGTAACAAACATCCAGAATGGCACAAAATCCCCTGTACCAGGAGGCACT<br/> GATGCTGGTAGCTCAGGCCTCAATCCGTGATTCTTGGGGCCAGAGCTCTGTCGTCATCGGCGA<br/> TGGGTGGAAATTAACCTACAGTATACGGTTGTCGCGCTGGGTGCTGTCAACGCGTTACGCAGAT<br/> GGCCCAGGTCTCTTATTCCAATGCTTACTGGCTACACCCGAGGTGAAGGCAACGCGAGCTCT<br/> CTTGAACGAGGCACGGGCTCTTCTTCAACCTATTACGAGAAACGGGCGCGTGAATTTGATGCA<br/> GATCCTGCAACACAGACCGATGCATTTGGATGGTTTCGAGGAAGTAGCTGAACGACAGCCATAT<br/> GATCCGACGGTTGCGCAGCTCACTTTTGCGGTAGCAGCAATTCATTCTACAACAGACCTATTATG<br/> CCAGGTGCTTATAGACCTGGTAACCACCCCGACATTATCCAGGAACCTGAGGAAGGAGTTGGTA<br/> GATGTCCTGACGCGGGAGGGCTGGCAGCAATCCGCTTTCGGTCATCTCAAGTCTATGGACAGTG<br/> TAATGAAGGAGTCCAGCGTCTCAAGCCTATAAGTCGAGGTAAGTCATTTCCATGTACGCAATC<br/> AACACACTGGCTGACTTGCTCAGTGTTAATAAACCGGTTGCCATGGACGATATCGAATTGAGC</p>                                                                                                                                                                                                                                                                                                                                                                                                                                                                                                                                                                                                                                    |



|             |                                                                                                                                                                                                                                                                                                                                                                                                                                                                                                                                                                                                                                                                                                                                                                                                                                                                                                                                                                                                                                                                                                                                                                                                                                                                                                                                                                                                                                                                                                                                                                                                                                                                                                                                                                                                                                                                                                                                                                                                                                                                                                                                                                                                                                                                                 |
|-------------|---------------------------------------------------------------------------------------------------------------------------------------------------------------------------------------------------------------------------------------------------------------------------------------------------------------------------------------------------------------------------------------------------------------------------------------------------------------------------------------------------------------------------------------------------------------------------------------------------------------------------------------------------------------------------------------------------------------------------------------------------------------------------------------------------------------------------------------------------------------------------------------------------------------------------------------------------------------------------------------------------------------------------------------------------------------------------------------------------------------------------------------------------------------------------------------------------------------------------------------------------------------------------------------------------------------------------------------------------------------------------------------------------------------------------------------------------------------------------------------------------------------------------------------------------------------------------------------------------------------------------------------------------------------------------------------------------------------------------------------------------------------------------------------------------------------------------------------------------------------------------------------------------------------------------------------------------------------------------------------------------------------------------------------------------------------------------------------------------------------------------------------------------------------------------------------------------------------------------------------------------------------------------------|
|             | GAAAGCGTAAAGATTCCAAAGGGAGCCTACGTAGTTGTTTCGGCACATAATATGATGGACCCCA<br>ACATTTATCCAGAGCCGTTCAAGTTCGACGCCTATCGTTTCATTAAGAGGGCGCAGGTGCCAGA<br>CCTCGCGAGGTTACAGCAGTTCTCAGCTGTCAGTCTCGAGCACACAGGCTTTGGCTTTGGCAAAC<br>ATGCCTGCCCGGTGCGACGTATGTCACTCTCGAACTGAAGATATTGCTGTCTCACATTATCCTCA<br>AGTATGACTGGAGGTTATCAGACGGGTACAAGCCCAAGGTCTTTAACAACGGGTTTGACAGTGT<br>GACCGACGTTACCGCACAGCTTTTGATCCGGAGGCGAAAAGAGGAGATTAACATCTTACCTGCT<br>TAA                                                                                                                                                                                                                                                                                                                                                                                                                                                                                                                                                                                                                                                                                                                                                                                                                                                                                                                                                                                                                                                                                                                                                                                                                                                                                                                                                                                                                                                                                                                                                                                                                                                                                                                                                                                                                                                   |
| <b>CtyC</b> | ATGAGCCTGTTTTACAACGTTCTCGATGGCCTCTCGTTAAGAGACATCGTCTTCTTAGCGGTGCC<br>CACCACATTTGTTTGCTACTTCATTACGGTACTTATTTATCGGCTTTACTTCCATCCTCTGGCGAAA<br>TTCCCAGTCCCAAAATCGCAGCAGGAACATATCTCTATGAAATAGCGTGGGACTATTTTGGTCA<br>TGGAGCCTATCTCTCGAGTGCAGCGAATGCATGCGAAATACGGTTATATATGCACCTGCTCTT<br>TCCTTTCCACCTGGTCAACTAACTGCTCTTTGTGTAGGACCAATTATACGTGTGAATCCTTCCGAA<br>CTCTCGATCAAGGACCCAGAGTACTACAACACATTGTATGTTACAGGGGCAATTAGGAAAAACA<br>ATGCCTGGCCTCACTTTGGAGATGGCATGGACTTTAACGGTATTTCTCCCGTATTGAGTCTGCT<br>CAATCTAGCGAGAAAGACACCACTGCTTACTTCAGCAGGGTTCGCATGGAATGACTGTAGACCAT<br>GATCACCACCGCCGGCGTTCGCAAGCCCATGGAACGGTCTTCTCACAAGCTGGAGTTAGTCGGA<br>TTGAGCCACTTCTGCATGATCTTGTCCAGACGTTGGTTGCAAGACTGTATGAGTACCAAGGA<br>GGCAAGCCAGTCAGACTGGACCATGTCTTCGCGCTCTAGCAGGGGACGTTGTTAGTGCAATCT<br>GTATCGAGAATCCCGAGATATCTTTCTTCGCGACCCAGAATTTAGCCCCACTGGTAAAGTGT<br>CTTCTTGGGCCGTGGTTAACCTTGGTAACTCCCGTATACATGCGAAAAACAGGTACGATCTATT<br>TCACACACTTATTTGCTCGATGCCTATTTTCATGAACCTCACCTGGATCATAACAGTAAGTAACTTC<br>TAATGCCTCCAGACGATCTACCACTGACTAAAGCACGTGGTGTTCAGGGTCTGACACTAATT<br>CCTGCATGGTTGCTCAAGAGACTGGATCCAAGAAGTCAAATGTTCCGAGACTGGAGAAGTGTG<br>AGATAATTTGAAGTTCACCGTTTTGCATCATTGAAAATATACTACAGAAATATTGACTGGTAAAC<br>TCAATTC AACCTGCAGATGTCGCTCGATCACATTATTGAAGCCAAACGTCGAAAACCTTGC GGAA<br>TTGTGCGCGACGACGGCACTTCAAATACAACACTTTATTTGACCATTTGGTCACTTCCGACCTAC<br>CTGAGTCGGAACCTTTCAGTGGAGCGCTTGGCATCAGAAGCTCAGGTAATCATGGGAGCTGGTAC<br>AGTTACTACAGCCCGGTCCATGGATCACCTAGTTGTTACATCCTGCTCAATGAGGGCATTTCGTC<br>AACGACTCTGCGAGGAGTTGAGGGAGCCCATGGCCAATTTCTGAAAAAATGCCAAGCTACAA<br>AGTCCTTGAGCAGCTTCCGTATCTACAGGCGTGCATCAAAGAAGGTCTCCGGTGAGTACCGCAC<br>ACCATGTTTTAATCGCTGCCAACAGGAATCACTGATTTGTCTTGGAAAGGCTGAGTCACGGAATCA<br>TGCACCGTCTGCCACGTTGCTCGCCAACGTCGAACTTCAATACAATGAATGGACTATTCCGAAG<br>GGTGTGAGTGTCTTAGGTCTGATAGAGTCTTCATACATAGGATCGCTAACATGTTTCCAACAAA<br>AACCCTAATAGACCCAGTTGGTATGTCGGCCTACTATATGCATACAGATCCCGACGCTTTGAA<br>AGCCCATTTGTGTTTAGACCAGAGAGGTGGCTGGAGGGAGTCACTGCGGAGATGCAGCGTAAC<br>TACGTCCCATTCACAAAAGGCTCACGAGGCTGCCTAGGAATAAAGTAAAGTATATTTAATCCATC<br>TACTTTGCTGTATGTGAGTCTAGTTAACTGGTACAGTCTGGCTTATGCCGAGATGTCAATGGTTT<br>TCGCGGCTCTTTCTCTCCAACGGACCGAAATTA AAACTATACCAGACTGATGCAACAGACGCC<br>GACCCGGCCTGTGCATTTCTTTACCATTGCCACGACTAGATAGCAAGGGTATCAGGGTCACTAT<br>CGAATAA |
| <b>CtyD</b> | ATGAATTACCCCATTTCTATTCCCAAAGGAACACACCCTATACCCGATGGGGAAATTGATCA<br>TAGATCAGCTGTTGACATAGTTGCATCTTTGAAGACATACGCAGCACCCACAGCTAGCGAGAAG<br>AATTTGTGGGCATACTGGCACACTGGCTGGGATTTCGATGCCGCCGTGGTGCCAGCGTAATGTGA<br>TTGACTGGGTACGTCGCCTTGGGCCCTCTGGACCGTCCGTGTCCTGGACAGCGTTGAGGACTC<br>GCCCATGAACGTGACCCGATTCAATTGGACGGGAGTTCTTACCAGATGCTTTCAATACTCGCACCA<br>TGACGGGTGCGTACATGGCAACGCACTCTGCAGATCTCATTGCGCTGCCCTCCTGCTGCTCTAT<br>GGCGGTGTGTGGATGGATGTTGGGATCATACTGATTCGGAACCTCGATGATATCTGGAATATTC<br>TTGCGGACCTTCTTACCCTATGAGTTTTCGCGCTTTGCATTGAGTGTGCTCCAGGAAAACCTG<br>TCCGTCATCAACCCGTGGCTGGCGGCCAGGAAGGGCTGTGCTCTTGTCAAGCGCTGGCAGGATA<br>CCTTCTCCACGTATGGGGCAATTCGACTGAGTGCACAAATCTATCTCAGCATCCATTGCTTCGC<br>CACCTCGAACCGTACCAAGTCGGTGGGCTCTCACATAAGCCATTAAGAAGGACAAGATCAGCG<br>GTGAGGTTGCGAAGCTTATGGACTACGGGACACAAGTTCTCTGTCTTGAGCGTCTCCGCGATCT<br>AGTAGACGCTAGCGACGGCTGGAATGGCAGAGATTACCTGGACAAAAAGCCTATCTTCTCCCT<br>GGTCTGACAGAGATGTGGTATTACCAGCTGAGCACAAATTCCTTGGCACTAAACAATTTGAATT<br>ATTGAATACGCGATACGACGCTCCGGAACGAAACGCTCCGAGGCGGAGA ACTATGTCCAAGAT<br>TTGCTGTCCAACACAATGCTCCTAAAGCTATGCCATGGCGCCGGCGTAATGCAATCCAATCTTGC<br>AGATATCTGGGACGATCCTAAGCAAAGGGGAGCCGACTCCGCTCCCGGCACGTTTCGCGGAGTT                                                                                                                                                                                                                                                                                                                                                                                                                                                                                                                                                                                                                                                                                                                                                                                                                                                                                                                                                                                                                                                                                  |

|             |                                                                                                                                                                                                                                                                                                                                                                                                                                                                                                                                                                                                                                                                                                                                                                                                                                                                                                                                                                                                                                                                                                                                                                                                                                                                                                                                                                                                                                                                                                                                                                                                                                                                                                                                                                                                                                                                                                                                                                                                                                                                                                                                                                                                                                                                                                                                                                                                                                                                                                                                                                                                                                                                                                                                                                                                                                                        |
|-------------|--------------------------------------------------------------------------------------------------------------------------------------------------------------------------------------------------------------------------------------------------------------------------------------------------------------------------------------------------------------------------------------------------------------------------------------------------------------------------------------------------------------------------------------------------------------------------------------------------------------------------------------------------------------------------------------------------------------------------------------------------------------------------------------------------------------------------------------------------------------------------------------------------------------------------------------------------------------------------------------------------------------------------------------------------------------------------------------------------------------------------------------------------------------------------------------------------------------------------------------------------------------------------------------------------------------------------------------------------------------------------------------------------------------------------------------------------------------------------------------------------------------------------------------------------------------------------------------------------------------------------------------------------------------------------------------------------------------------------------------------------------------------------------------------------------------------------------------------------------------------------------------------------------------------------------------------------------------------------------------------------------------------------------------------------------------------------------------------------------------------------------------------------------------------------------------------------------------------------------------------------------------------------------------------------------------------------------------------------------------------------------------------------------------------------------------------------------------------------------------------------------------------------------------------------------------------------------------------------------------------------------------------------------------------------------------------------------------------------------------------------------------------------------------------------------------------------------------------------------|
|             | CCTCAGGTGGGGGAGTGTTCACTTGAGTCAGACCAGGGAGTTACTCCCCACCAAGCTTACCCCT<br>GTATCCCATGAGCCCTACCATGCTCACATGTTTGACCCATTGGAGCACCGGAAATAA                                                                                                                                                                                                                                                                                                                                                                                                                                                                                                                                                                                                                                                                                                                                                                                                                                                                                                                                                                                                                                                                                                                                                                                                                                                                                                                                                                                                                                                                                                                                                                                                                                                                                                                                                                                                                                                                                                                                                                                                                                                                                                                                                                                                                                                                                                                                                                                                                                                                                                                                                                                                                                                                                                                          |
| <b>CtyE</b> | ATGGCCGCAATGAACACGCCAGCCGATTTGACCAGACGGTCTACAAACAGCCCCTCGATTCA<br>TCGAGGTTTACCACAAAACATCTTCGAGGCATCGAGTCGAAGTCCGGTAATGGAGCGACGCT<br>AGCACAGACTGCTGTTATCCGCCAGGAGATTCTCTGTCTCTTCAACGATCTAAACATCAGGTCTA<br>TCGTTGATGCTCCATGCGGCGACTTCAACTGGATGAAAGAGATTATCAAGCAGTCACCAAACAT<br>ACAGTACCTCGGTCTTGACGTTGTTCTGATCTCATCGAGACGAACACCTCAGCATACGCCACCG<br>ACAAAGTCAAGTCCAAGTAGGGAATATCGTTACAGATGTCCTTCCACAGAATGACATGATCATC<br>TGCCGCGACTGCCTGGTGCATATGCCGATGGAACATGCCCTGAAGGCTATCGACAATTTCCGCA<br>AGAGCGGAGCCAGGTAAGTCTGCTCTGCACTACCTTTACTGGGAGGGATGAGAACAAGGAAGAAT<br>TCATCCGTGGTCTGTGGAGGGCGTTGAATATGGAGAAAACACCCTTTTCGACCTGGGCCAGCATC<br>CAGGCTGATCAATGAAAATTGCACCGAGGCTGGTGACTTCTGGCTGATAAGTGCTTGGATTG<br>TGGGACCTTACGAAGGATTA                                                                                                                                                                                                                                                                                                                                                                                                                                                                                                                                                                                                                                                                                                                                                                                                                                                                                                                                                                                                                                                                                                                                                                                                                                                                                                                                                                                                                                                                                                                                                                                                                                                                                                                                                                                                                                                                                                                                                                                                                                                                                                                              |
| <b>CtyF</b> | ATGGATTATCTTTACTCAACAGTTGTTGACCTTCCAACACTACGAGACCGAAGGTCTCTGTGATGG<br>TATTGATGTCGGGAAAAGCAACTACACTGAGCTTGAGGATCGAGGGGCCATCCGCACCCATCAG<br>GATTGGACTAAGTATATCCGGGATTGCTGTGGATATCGCGGGACTCTTGGCCAGAGTATAGCT<br>TTATGTCTGTTGCCGTTCCAGAGTGCATTCCAGATCGTCTGGAGATTATCTCTTACGCAAACGAG<br>TTCGCCTTCTCCATGATGGTAAGTTGTTCCAAAGCTAGATAAAGACTTGCTTATTGTATTATAGA<br>TGTCACGGAATTCGTTGATCATGAACTTGTAAGTTGAGGTTTCGAAACGGTTAGAGACCTGTGC<br>TTACACGCTAGCTGGCAGGGAGGTATCGAGAATGACGACATGATGGAAGTTTCTAGAAAGGT<br>GCACAGTCTGGGTTCAATTAATCCAGAAAAGGTTGAGACAAGACGTATAGGGAAGAAGCAGATC<br>CAGTCCAAGCTTACTGGAGATGGTGCCATCGACCGTGAGTGCCCTGGTGACAATGAAG<br>GCTTGGGCGAAGTCTGGAGGTCGGGTCAGCCGACAGCATGATACACGTTTCACTTCACTCA<br>AGACATACTTGCCTTACCGTATAATGGATGTTGGCGAAATGTAAGTAGGATTTCACTCTTAACAG<br>TATCTCATATTTACATCGGAAACCTGTTCAAGAACTGACTGGGGTATACAGTTTTGGTATGGG<br>GTAGTTACTTTCCGCATGGGCTTACACATCCCCGACCATGAGATGGATACTGCCCGCATTAAT<br>GGCGCCGGCTTGGATTGCTGTTTGCCTTCCAGAAATGACCTATTCATGGCCAAAAGAGCAGCAG<br>GCGGCCACAGTCTGGCGAGGACCATGTTGTGAACGCGATCTGGGTTCTAATGCAAGAGCAT<br>AACGTTGATGTCGATGGAGCCGTTAAAATTTGTCGAGACCTTATCAAGCGGTATGTTGCCAATA<br>TGTCCTTATTGTTAAGGAGAACAAGGACAATGAGCTCCTCTAAGGACCTCCGAAAAGTACATTG<br>AGGCAATGCAATACAGTATCTCTGGCAACGTTGCTGGAGCCGCACATGTCCACGATACAATCC<br>GCATGCCTCGTTTAAACAAGACGCAGCTGGACTGGATGCACAACGGGATCCAGCGCTGGACTCT<br>TCCAGCAGTACCCAGAGGCTTTTGAACAAGACTCGAGCTCCACCAGCCCAGAGCCGTCGAACG<br>TAACCTCACCGTTACTTGACATGGACCTGTGGATGTTGACAGAAATGGACAATCGTCATCTACAA<br>CACAGTGAAGCTTTTCTAGCGTATGTAGATACTGGTCGCTACATACTATCCGGCAGCCAGGAG<br>AAACAACAAGCTAACATAACTACTATATTTAAGGATGTCGTTGAAACTCCATATCACTATATAT<br>GTTCTTTACCATCGAAAGGTGTTTCGCGATCGGTTTATAGACGCAATGAACCATTGGTTCCAGGGC<br>CCACGTGGAACCTTTGGACGAGGTCAAGAAAGTCATCAATACGCTACACAACCTCATCGCTCATGT<br>GAGATCCCGAATGCCCGTACGGCTCTAACTCTAAGAGGTTTGTCTAATGATTGAATCATAGAT<br>TGGACGACTTCCAAGACGGCTCGCCATTACGACGAGGCAAACCGGCTGCTCATACCATCTTCGG<br>TCCTGCACAGGCAGTTAACTCATCGAGTATTTTATCGTCAAGGCTATTGCGCACATTCAAAGCT<br>TTTCAAGACCTGTGGACTTGAAGTTTCCATAGGTAAGCATTGGAACTTCTTATTGAGATTTTC<br>CGTTCCGCTAATAGTCCCTTTCCCTCTTTAACAGAGAAAATTTGGAAATGTTTCAAGGCCAAGC<br>AATGGATCTACACTGGACATAAATATCGCCTGTCCCTCTATCAACGAGTATAAAAACATGATCA<br>GAAAAAGTAAGGGAGCTTGCTTTCCGATGCTGAAAATTTGGATCTGAGTGATTAATGAAAAT<br>AGAAACCGGTGCTCTATTTGGGCTAGCCAGTACCTCATTGGAACCTATTACCCCGTCGCCATGA<br>CGAGCGACACGCTCACGGCCACGGATAGAATGACAGCACTCTAGGCCTGTATTTCCAGATCCG<br>CGATGACTACCAGAACCTAATGTCTACTGATGTGAGTTACTTGTGTCTCCGATATCCTATACAAT<br>AATCTAAAATTCATAGAAAAAATCCTTCTAATTTACTTCTAGTACACTGACCAGAAAAGGCTTCTG<br>CGAAGATTTGGATGAAGGAAAATACTCCTTGCCCTGATTATGCTCTCGAGACCCACCCGAGC<br>AACCTGTCGCTAAGAAATATTTTATCGACACGGCATGTGCATGGGCGAGCTGACCCGCAAACAGA<br>AAGAGTTTGTGCTGGAGGAAATCAAAGCATGCAACAGCTTGGGTTGGACAAAATGGTTCTCGC<br>CGACTTGCCTCCAGGTTGTGGCAGAGATCGACAAGTTGGACAAGGTTTTTGAACAAGGAAAAC<br>TTGAGATCAAGACTCTCATGGAGTTCTACGCATCTGA |
| <b>CtyG</b> | ATGGATGCAGTTTTTTTTGAAAAGATGGACCAGATTCTCTTGTCCGGCTTTGGGGTATTGTAAG<br>TAACCTACCAGCTTGGATATTGCGCACTAATCACCCTTGCACCTCAGGCCCTTCTTTGATCCTT                                                                                                                                                                                                                                                                                                                                                                                                                                                                                                                                                                                                                                                                                                                                                                                                                                                                                                                                                                                                                                                                                                                                                                                                                                                                                                                                                                                                                                                                                                                                                                                                                                                                                                                                                                                                                                                                                                                                                                                                                                                                                                                                                                                                                                                                                                                                                                                                                                                                                                                                                                                                                                                                                                                   |

|             |                                                                                                                                                                                                                                                                                                                                                                                                                                                                                                                                                                                                                                                                                                                                                                                                                                                                                                                                                                                                                                                                                                                                                                                                                                                                                                                                                                                                                                                                                                                                                                                                                                                                                                                                                                                                                                                                                                                                                                                                                                                                                                                                          |
|-------------|------------------------------------------------------------------------------------------------------------------------------------------------------------------------------------------------------------------------------------------------------------------------------------------------------------------------------------------------------------------------------------------------------------------------------------------------------------------------------------------------------------------------------------------------------------------------------------------------------------------------------------------------------------------------------------------------------------------------------------------------------------------------------------------------------------------------------------------------------------------------------------------------------------------------------------------------------------------------------------------------------------------------------------------------------------------------------------------------------------------------------------------------------------------------------------------------------------------------------------------------------------------------------------------------------------------------------------------------------------------------------------------------------------------------------------------------------------------------------------------------------------------------------------------------------------------------------------------------------------------------------------------------------------------------------------------------------------------------------------------------------------------------------------------------------------------------------------------------------------------------------------------------------------------------------------------------------------------------------------------------------------------------------------------------------------------------------------------------------------------------------------------|
|             | <p>GGGCAGGGACTGTACAATATCTACTTCCACCCAGCTAAAGACTTCCCCGGTCCTTACCTTGCAAA<br/> GGCAACACGTCTATACTACTCATACTACCGAAGCACCCGGACAACCTCGAGTTTAAAGACCAAAGAG<br/> CTTCATGATAAATATGGCCAAGTTGTGCGGCTTGACCCGGATGAATGTATGATCTTCTGCACCTT<br/> CTACTTAAGACATCTTTGGAGTTTCATGAATGCTGATGTAGGACTGGTATCTGCCCTATCAGT<br/> GAGCTTCAATGGTGGTACAGCATGGGACGATATATATGGTTCAAAACTAAGAAATCGTCTGGA<br/> AAGAATCTAATGTAAGCGAGCTTAGCGGGTGAATTTGCATGCTATTTGTCTAATATCTCGATAG<br/> GAAAGACCCTCACTTTTATATAGGTGCCACGGCGCCGAATGGCGAGAAGAATTTGGTAAGCTTT<br/> ATCTGTGGATTTCTCTCAATGCACATCCAGCTAAGCCCATATAATCAAAATCTTACAGGGAGCA<br/> TCTGGGGATCTTGACCATGCTCGAATCCGAGGCGTTCTTTCATATGCTTTCTCCGACAAAACCCCT<br/> CTACTCTCAAGAAGTAACTCTCATCAGCCACATCGACCATCTTATCCGACGGCTACATGCGCTTA<br/> ATGGACAGGGCCACTGATGGAGTGCCTGGCTACACCACTGCACCTACGATATCATCACGGACCT<br/> AGCCCTCGGGCAGAGCGCTAACACACTTGCCTGTGACACATGGAGCCCTCAAGCACACCTCATT<br/> TTTGAAAGTATCAAGGAAGGTATTGTGTTGTTGAGATATTGCGGTTCTTGCCCTTCAAGAACCA<br/> TATCCTTACCTTCTTCATGAAGATGTTTGGCACTGTTATGCGTCAGAATTCGATCAGGCTGTGCA<br/> AAGAGCCCGCAAACGCATGGAGACACAGGATATAAACAAGCCCGACTTCATATCCTACATTCTG<br/> CGAGCCAACGAGTCAGCCCGGGCTCTGACATCGAAGGAGATTACAGCCAATACTGCGCTTCTCC<br/> TTGACGCCGTTCTGAAACCACTGCTTCTACTTTTCAGGTATATAGAATGATCTCCTTCAATTCG<br/> CTCCTACCCTAACCTATCTAGGATGCCTGTTTACCTTGCCAAGAATCCAGATGCTTGTAGCAAAC<br/> TAAGCCAAGTCACTCCGCGAAAGATTGCCCAGGAAAACGAAATGGACTCTAAGAGCCTAGCACA<br/> ACTCCCGTACCTCACAGCCGCTCTCAATGAGTCTTTACGCATTTACCCATCCGTGGCATCATCAAC<br/> ACCACGCTTGACACCACTGGGTGGGTCTAAAAGTACGTCAAATCAGGTTTGTAGTTACTTACCCCC<br/> CGTTTACAGACCACGAGGCGGGTACTTCAAATGAAAGCTAACTTTTGGTCTATCTGCAGTC<br/> GATAATCGCTTTGTTCCGGTAAACATCATTGTTGCAAGTGAATCAGTATGCTGCGTACAGGTCCGA<br/> GGATAATTCGCTGATCCCTACTCCTTATTCTGAGCGTTGGCTTAGTGGTAACAATGATAAGC<br/> GCTTTGTCAATGACAAGCCTCCGTTCTGCAGCCTTCTCAATTGGGCTCGGAACCTGCTTGGGA<br/> AGGAAGTATGTATCCTGCCTATCTAGCTCCGGTGTTCCTTCACAATGTGTTATGCATGTATGATTT<br/> ATTACAACTGACTGTATTTGCTAGTCTTGGCTCGAGATGCGTCTGGTATTAGGCCGTCTA<br/> TTGTGGAACCTTGACTTGGAACTCACTGAGGAGTCTCAAATTTGGCACGCCGTGCAAAAGACAT<br/> GGTTTATTTGGGATAAGCCTGATCTCATGATGCGATTCAAGGCACGACAGACCTTGCCAATTACT<br/> AGCAGTGAGTGA</p> |
| <b>CtyH</b> | <p>ATGGATTCTAAATCGACGTTTGATATTGTGCCACTAGACCATGGCCCTGATTCCAAGGCTAATGT<br/> GAGTTGGGCTTTGTTTTCTTCTACTACTCGGCATGCTAACCTAAAGTCCCTGCAAGTTTGGAGCT<br/> GCAATCTATGGGCTTGATCTGGGCAATATCACAGGTAAAAATGACACTACTCGGAACCTTGAAA<br/> TATTTAGGAAAAGATGTATTCTGACTAAAGATAGATGATGAACCTTGACGACTACGGAATGCAG<br/> TCATGCAGTATAAGGTGGTCATTGTGAAGAAGCAGTTCTCGCTGGCCCCAAAGAAAAATTGGGA<br/> GTTGTTGCAACGGCTTGACCCTGAGGCAGCTTCATACAACACGGAAGAGTTTGGTAAACTGTTT<br/> CACCCGACTGGACAAGGCATTATTGTAAGACTCATCTCATCCGGTCAAAGTATGCCATTCTCTG<br/> CTAACAGATACGTTTATTAGGAAAAATTAAGGGTCGCCACTGTACCTGATGCCGGCCAAATTCAT<br/> CTCATCGGCAAAGGATACCAAGGGGATGATCATTATGGCATGAAGAAGCTCAACCTTGGCGAG<br/> GCATTTGCCAACGGCTACTATTGCAAGCCGTTATCCGAAGAAGCATTGAGCAAGGCGTAACTC<br/> GTTTCCAATCATGGCACATGGATGGCCCTCTGTATAAAGTGAATCCTCCTATGATTAGCTCGTTT<br/> GCATCATCAAATTTCCGGTAGGGCAACAAGAGGTGCGACTGGGCCGACGGCTCTGGGTTCAAGA<br/> AGCGGGTCCCCGCGGGGCGCACTGCCTTCTCAGTACATCTCAATTGTACAGTCTATTTCCGAC<br/> GAAGAGAAGAAAATGGCGGATCACAGCTGGGTGGAATATATGTTCTATCCATACGAGTGGATT<br/> CGCGGCTGCCATGGGAACCCCAATGGATTAGGTGTGGCATCTGAGGGTCAAGAGGTACCTGAT<br/> GAGCAGTTAGCCGAGCTGGTCCAGACAGGCACCCTTCATGGACCCGGGTGGTGAAGACCC<br/> TTACTCTCAACAATATTCATTCTATGCACCATTAAGCACTTGGGTTCTGATCGCTAACTAGGT<br/> TATGCCTCAATGATCACAGCTCCCGATGGTATGGGTGAACCAACGACTGGTGAAGGCATT<br/> CAGGTGCAGCCTAACTGTGTGCGCCGAGTTTTCGTCAGACACAACGCCAACGATTGCTCAAGG<br/> TTATCGAGGATGTGGCAGAGGTGCGAGATTTCTGAATCGCCTGCAGACCCGATTGTCAGGCC<br/> TGAGTACATCTATGCTGGCCCCGAAGACGAAGGAGATCATTTGCTGTGTTTAACTGGGGCCTT<br/> ATGCATAGTAGGATTGATTATCCATTAAGTTTGGACCCAGAATTACACACAGGTTGGATCCC<br/> TTCCAGCCGTGCACCTACTGGTCCAGTTCCGATTCTCAAATATCTAG</p>                                                                                                                                                                                                                                                                                                                                                                                                                                                                                               |
| <b>CtyI</b> | <p>ATGGCCGAGATTACACAGCAATTAACAAGTTGTGGCCATGGTTGATGACCTTGTAGCAAGG<br/> CAGATGTCACTGGGCGACGGACCATCCAGGACATACTGATGAAACTCCAACACTCACTCGAGAC<br/> TCCTTTGAGACAACCATGAGGATGTATGACTGGCATCACCGGTCCATGGTTGTTAGAATGGGT<br/> TCAGATCTCCAGATCTTCAAGTTCTATCTGAGAGCCCCAACCCACTGACAGTGGACGATCTTGC</p>                                                                                                                                                                                                                                                                                                                                                                                                                                                                                                                                                                                                                                                                                                                                                                                                                                                                                                                                                                                                                                                                                                                                                                                                                                                                                                                                                                                                                                                                                                                                                                                                                                                                                                                                                                                                                                                    |

|             |                                                                                                                                                                                                                                                                                                                                                                                                                                                                                                                                                                                                                                                                                                                                                                                                                                                                                                                                                                                                                                                                                                                                                                                                                                                                                                                                                                                                                                                         |
|-------------|---------------------------------------------------------------------------------------------------------------------------------------------------------------------------------------------------------------------------------------------------------------------------------------------------------------------------------------------------------------------------------------------------------------------------------------------------------------------------------------------------------------------------------------------------------------------------------------------------------------------------------------------------------------------------------------------------------------------------------------------------------------------------------------------------------------------------------------------------------------------------------------------------------------------------------------------------------------------------------------------------------------------------------------------------------------------------------------------------------------------------------------------------------------------------------------------------------------------------------------------------------------------------------------------------------------------------------------------------------------------------------------------------------------------------------------------------------|
|             | <p>CAAACGCAACGGCGCCGCGCCGACGCTTCTGGTCAGTAGTCATATTCCGCGCCTATCGCATAA<br/> AATAATCTTATGGTTCCTTATATTACTTTGATTCTGATACCGTCAACGACCAGGCGCATATTG<br/> AGATATCTTGCATCAGAGGACATGATTGACGAGGTCGATCAGGACACATTCAGTCAAATAAAA<br/> CGAGCAGGTGGTTTGAACCGATGACATGGATGGTGGGATTCATCTCTCGTAAGTGTAGCTCCC<br/> ATATCCCAAGGCTGACGTGTTAAAAACTATTGTCTTTACGGCATCTTTGAAATGTACGCGTG<br/> ACTAACGTCAACTCTTGCTCGACCTAGCTTTGATGTGTGTGGCCGTACATACCAAGCACTTCCTG<br/> ATTTCTGCTCGAAAAAGGCTATCAGAATACACTTCCAACACCGACACTGCCTTCAACAAGGCG<br/> TGGGACACACAGGATCCCTGTTTCTACTGGCTCCGTAACCAGCCTAAGTCTTCAAGTACCTACA<br/> CCATGCACTACAACCTCAGCATCGTGAAGATTACTTAACAAAGTTCCATTGGAGTCATATCTCG<br/> GAGACTTTCAGCTCAGGCTACTGCGGACACCCAAGCAGTATTATTCGTTGATGTTGGGGGAAG<br/> CTTCGGCGTGCAAGTGAAGGGGTTGAAGGCCAAATACCCGCACCTAGCTGGACGTGTAATCTTA<br/> CAAGACATGAAGGAAACCATTGATCTAGTAAGGGAAGATCCAATTCCTGGCGTTGAGCTCATGG<br/> CCCAGGACTTTTTCCAGCCCCAAGTTGTCAAGGGTAAGCAAACAGCAGAAATGTTCTTTCTTG<br/> GAGAGATAAGAGTAAGGATAACTGACGGAGGCTGCTTTTCTAAATACTCAGGAGCCAAGTTCT<br/> ACTACCATCGTAATATCTTCATGATTATCCCACAACCGCTTCTGGTACTGCTGAAAAATCTCC<br/> TACCGGCCCTCAGTCCCAGCTCTTATTCTCATCGATGATAAAGTTTTGCCAAACAAGGGCGTA<br/> CACCGACATGTCACAATGATGGACATAGCTATGCTGGCACAGACAGGCTCCTGGAGCGGACCA<br/> TCGACCAGTGAAGACTCTTCTAGACCAGGTTGTTGCAAGATCCTCGACATCGTGACGTATTC<br/> GGATGAGCACGACTCTATCTTGGTCTGCGCCCTAAGAGTAGCGAGTTGAAGTTCTGA</p>                                                                                          |
| <b>CtyJ</b> | <p>ATGTCTGAATCGACGTACAATCTGAAGTCTTACCAGAAATTCTGGCTCAAGATATGCCAGCCGGC<br/> CATCGCCGGTCTCATGAACCACGCTGGTACTTACTCAGCCGACGAGAAAGAAAACAACCTTCGT<br/> TTTGTGAGGAATATGTTACCGCCTGGTTGGGCCGCAACCAGCGGGTGGTCTTAACAAGGACG<br/> CATCACCTCTCGATGTTGCATCTCATTAGAGGCGAGTATTAATTTCTCCGAGAACGGAAGACC<br/> ATCGTACGCTTCCAATTTGAACCGCTGGCGCGACTGTCGGGATGCACACGTCTGCAGACCCTT<br/> CGGTCAAACGAAGTGCGAACCAATGTTGTCACAAGTTGAGAATCAATTGCCAGCGTCGATATG<br/> CGGTGGGCCATACAGTTTATAGAAGCGTCTTCCCAGAGATCCAGACGAGATAGCCAGGGTTC<br/> GAGACAAAGAAACCAGTCTGCCGTTCCCCTTAATCACGCCCTAACGTTCAACGTGCTTTTGGAC<br/> CTTGATGGCGCGAGAAAGAGGATGAAAACCTACTTTTTCCCATGGCGAAGAGTTTTGCCACCG<br/> GGAGGACGGGGGAGTCTCTTGTCTTCGACAACATCAGGAAACTTGACCCTTGTTGGAGTTGATTT<br/> AACCCCGCCTGTTAACTTTCTTGAGGGCTTTTTCAACACGTATCCAGATCCTTAACCATTGACAT<br/> GGTTGGTCTTGACTGCGCCGATCCTTCCACAGCACGCATCAAGGTGTACGCACATCTGCAGGCA<br/> AGAAACAGCTGGAATACAGTGAAGAGTGTCTGCACATTTGGCGACAAGGCCACTGATGAGACT<br/> CGGAAGCAGGGGCTACAAGTCTGCGCTCTATCTGGCATTGCTACTGGATGAGAAAGAGGAG<br/> CTGAGACCTGATGGTGGTGAGGACTATAACAAACCGCTCCGCTATCCAGACTCATTCTTGGA<br/> GCCTGATGTTGAGTTCGAGATAGTACCCGGTCCGCTATCCCGAAGTCAAACGTATGTGCC<br/> TCTCTGGCAGTACGGGACCAGCGATAGGAAAATTGCCGAGAACTTGGCTTCAATATTCCAGAGC<br/> TTGGGTTGGCATGAGGCGGCGAACAGTTATCTGCCAAATTGATGGAAACATTTCCAGGAGCTG<br/> ATCTGGACGGACCCAGTGTCTGCATAGCAACATATCATTTGCGTACTCGCAGAGAACTGGCGT<br/> TTATATAACTGTATATTATGCAGTTAGCGGTAAGGCTGTGGCCGCATCCAAGACCTTGGATATGA<br/> ACCGTTGA</p> |

## SUPPLEMENTARY FIGURES

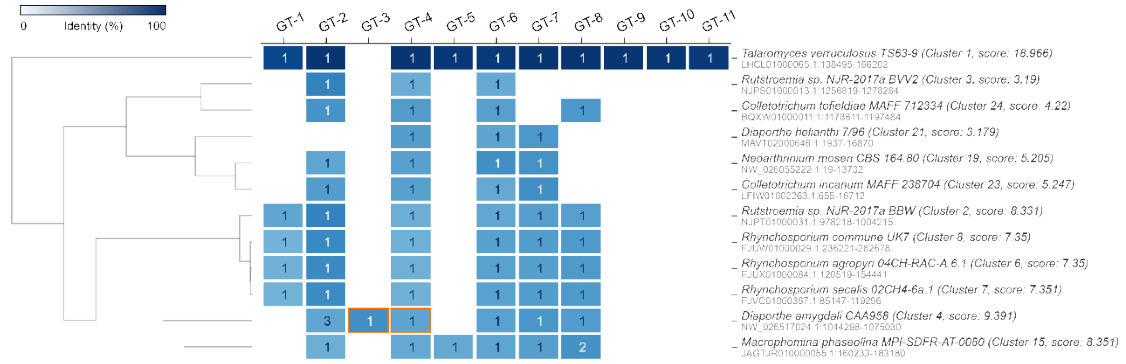

**Figure S 1.** The profile of cblast, the first line was a highly similar but longer biosynthetic gene cluster (BGC) in the *Talaromyces verruculosus* TS63-9 strain.

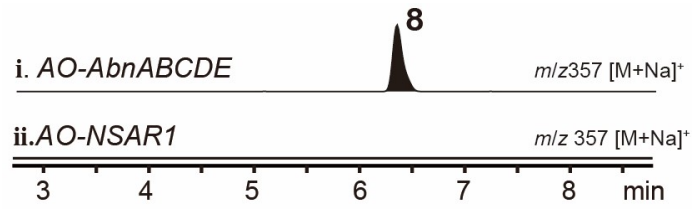

**Figure S 2.** EIC chromatography profile of *AO-AbnABCDE* and *AO-NSAR1*.

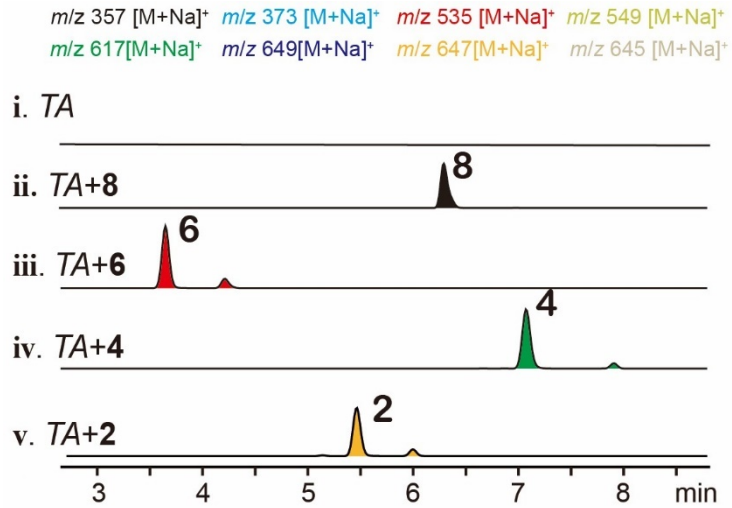

**Figure S 3.** EIC chromatography profile of *Talaromyces adpressus* fed with **8**, **6**, **4**, and **2**. No new generated cotylenin was detected.

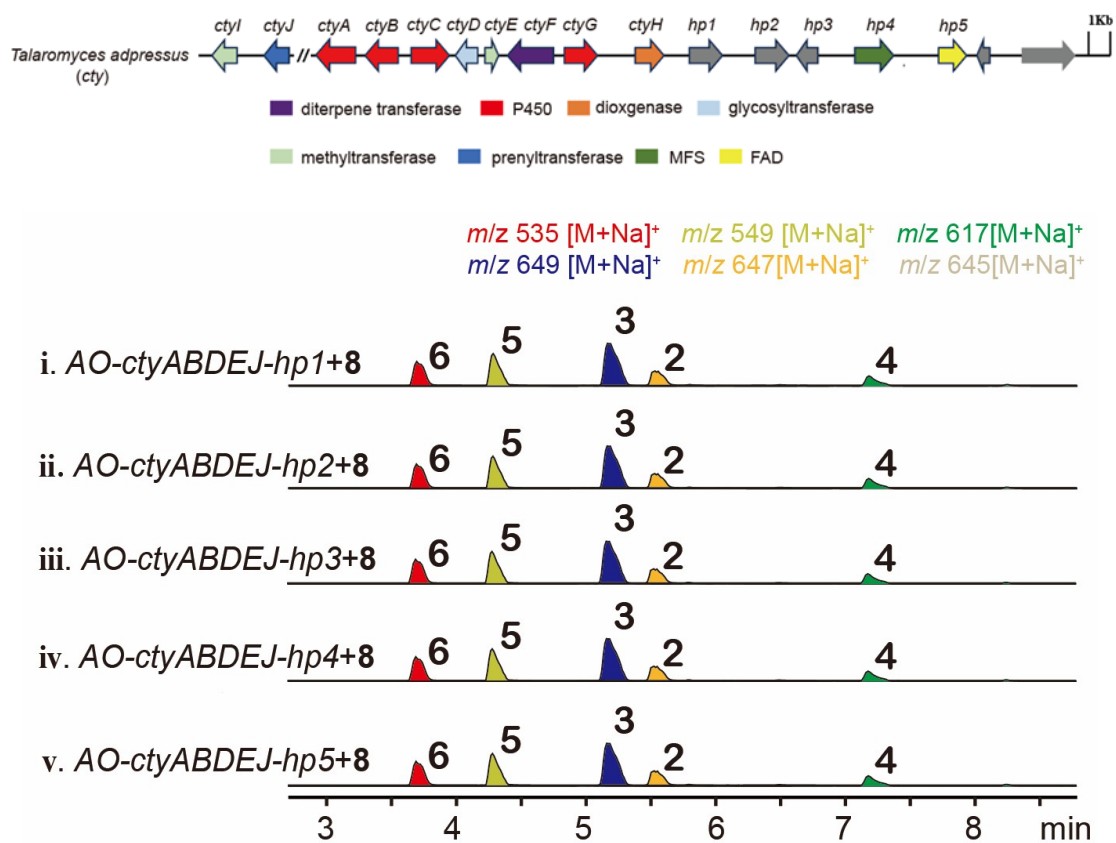

**Figure S 4.** EIC chromatography profile of the other unknown function gene were co-transformed with *cty*ABDEJ and fed with compound **8**. No further oxidation product  $m/z$  645 [M+Na]<sup>+</sup> was found.

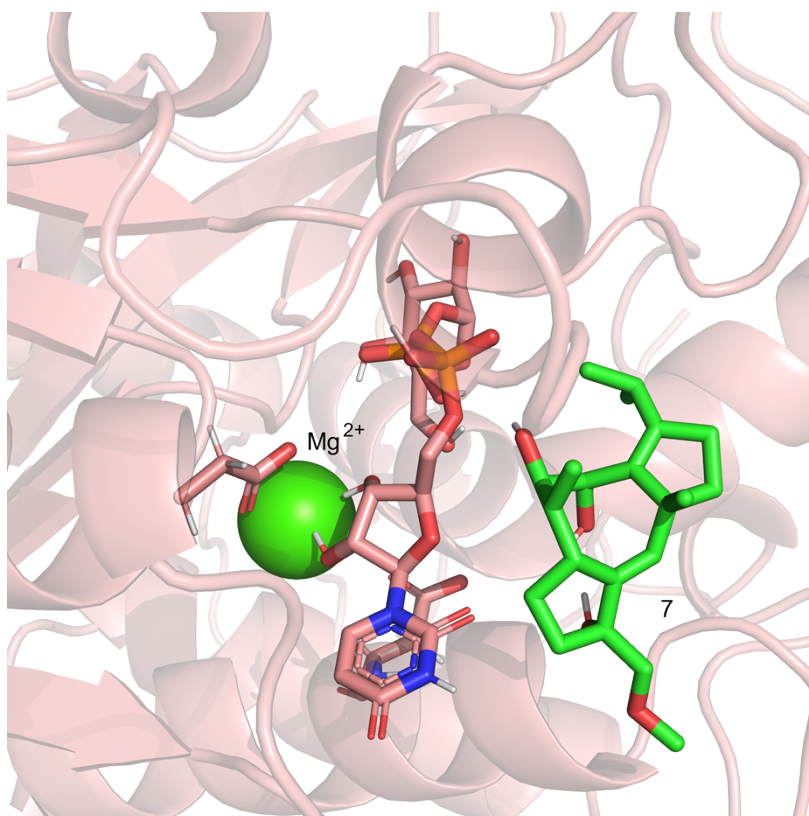

**Figure S 5.** The molecular docking between CtYD and its substrate **7**. CtYD was modeled on Alphafold2.



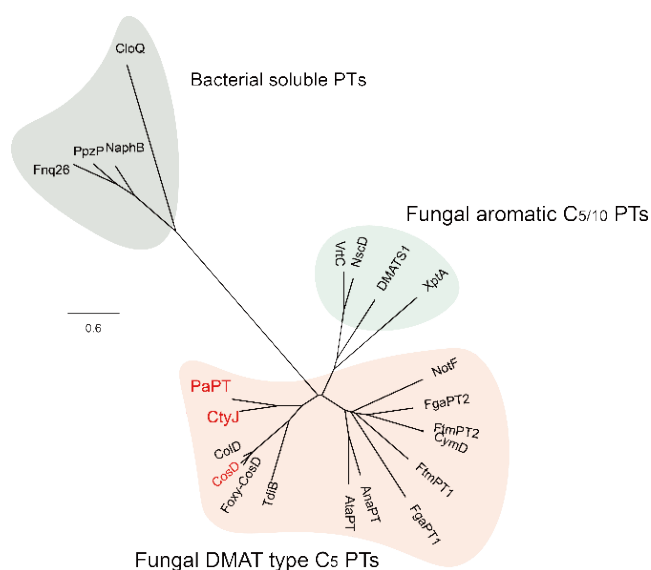

**Figure S 6.** Phylogenetic analysis of CtyJ and its homologues with other well-documented fungal and bacterial soluble prenyltransferases shows that it is clustered into fungal DMAT-type C5 prenyltransferase clade. PaPT (H7CE84), a DMAT implicated in the FC biosynthetic pathway, exhibits a close phylogenetic relationship with CtyJ. Additionally, another DMAT enzyme involved in the modification of the sugar moiety for cosmosporaside C, denoted as CosD, has been recently reported<sup>11</sup>.

The accession number of DMAT-type PTs used in this phylogenetic analysis were listed below. PaPT (H7CE84), FgaPT2 (AAX08549.1), FgaPT1 (XP\_756136.1), FtmPT2 (XP\_747179.1), AnaPT (A1DN10.1), CymD (KAG2001332.1), TdiB (ABU51603), NscD (NFIA\_112230), VrtC (ADI24928.1), Fnq26 (CAL34104.1), PpzP (C4PWA1.1), NaphB (1ZB6\_A), CloQ (Q8GHB2.1), NotF (E0Y3X1.1), FtmPT1 (AAX56314), DMATS1 (S0EH60.1), XptA (KAI8293691.1), AtaPT (5KCG\_A), Foxy-CosD (XP\_018252512.1), ColD (RDW88426.1).

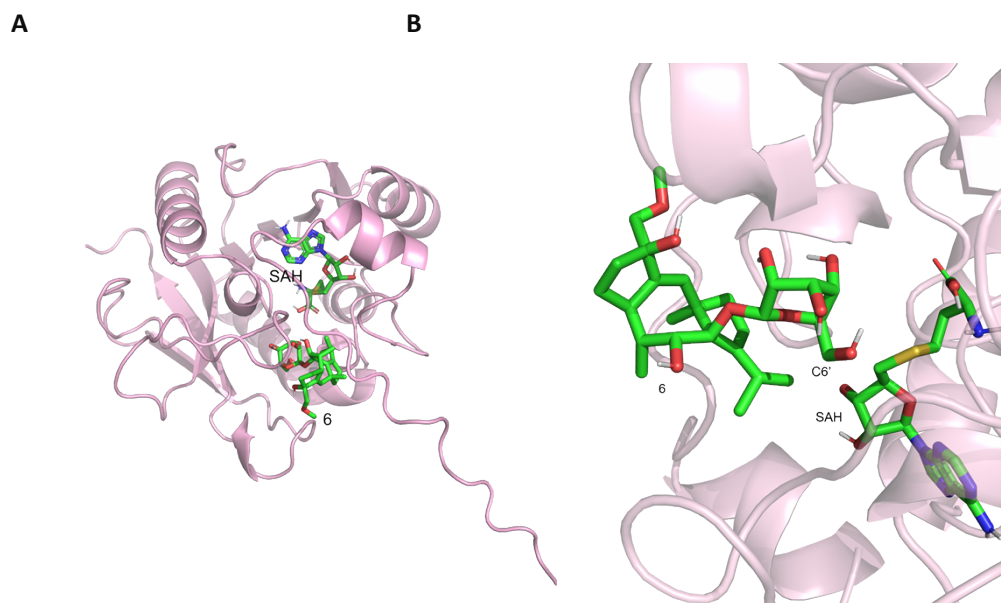

**Figure S 7.** The molecular docking between CtYE and its substrate **6**. **A)** The aglycone portion of **6** situated outside the cavity and the glycosyl part positioned within the reaction pocket, in proximity to the cofactor SAH. **B)** shows the docking scenario within the reaction pocket between **6** and SAH, where the C-6' hydroxyl group of the **6** glycoside is oriented towards the sulfur atom of SAH.

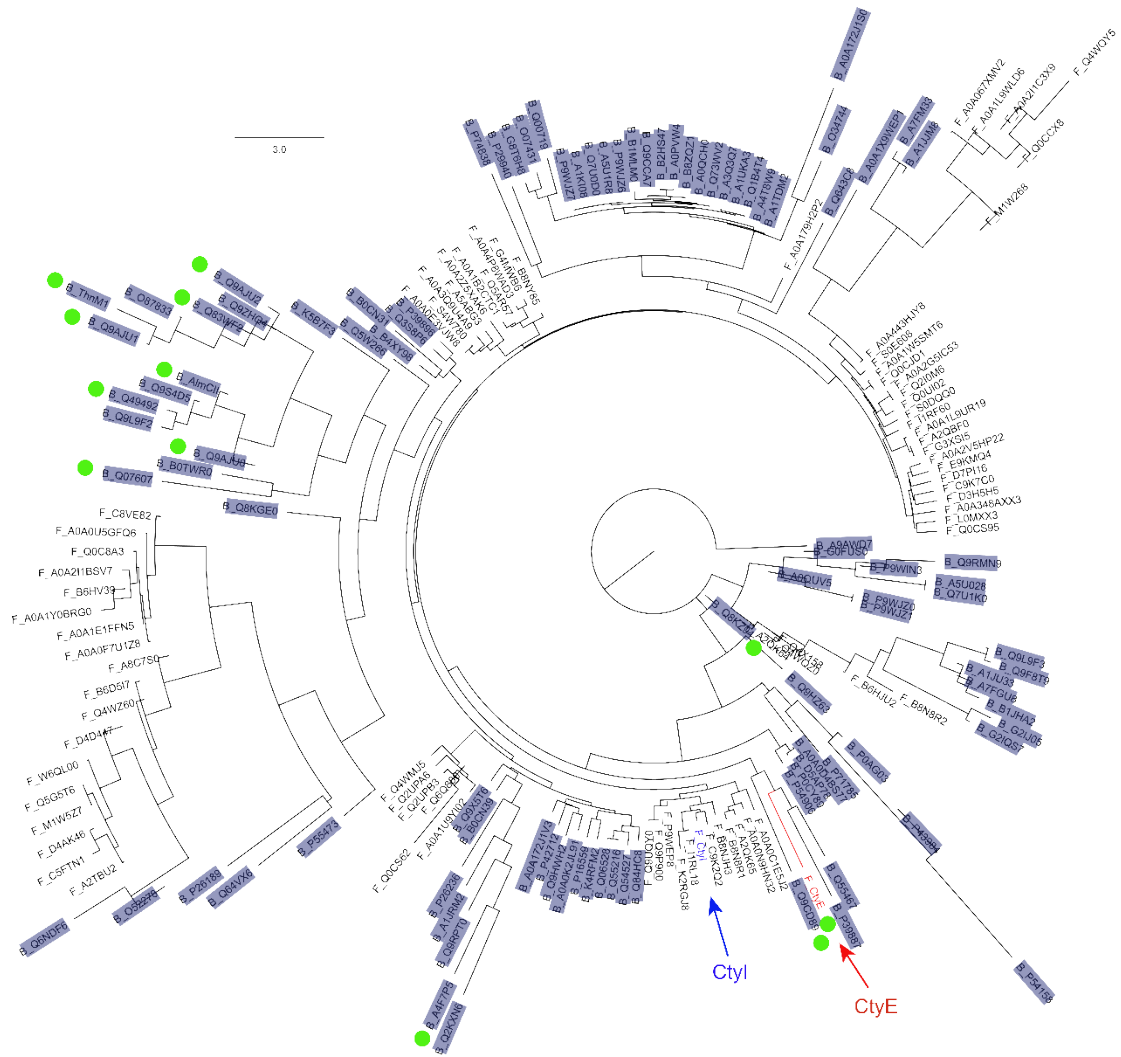

**Figure S 8.** A phylogenetic tree of methyltransferases from bacterial and fungal origins, mainly focusing on the modifications of secondary metabolites. Highlighted within the tree are two key methyltransferases from the *cty* cluster, CtyE and CtyI, indicated by red and blue arrows, respectively. Enzymes originating from bacteria are denoted with a prefix 'B\_' in their UniProt identifiers and are highlighted in gray. Enzymes from fungi are marked with a 'F\_' prefix before their UniProt numbers, without highlighting. Additionally, enzymes involved in methylations to sugars are further annotated with green dots next to their names, including RebM (Q8KZ94), ML0127 (Q9CD89), EryG (A4F7P5), DapA (Q07607), ElmMIII (Q9AJU0), MycF (Q49492), AlmC II (GOLWU9), ElmM II (Q9AJU1), OleY (O87833), MycE (Q83WF2), ElmMI (Q9AJU2).

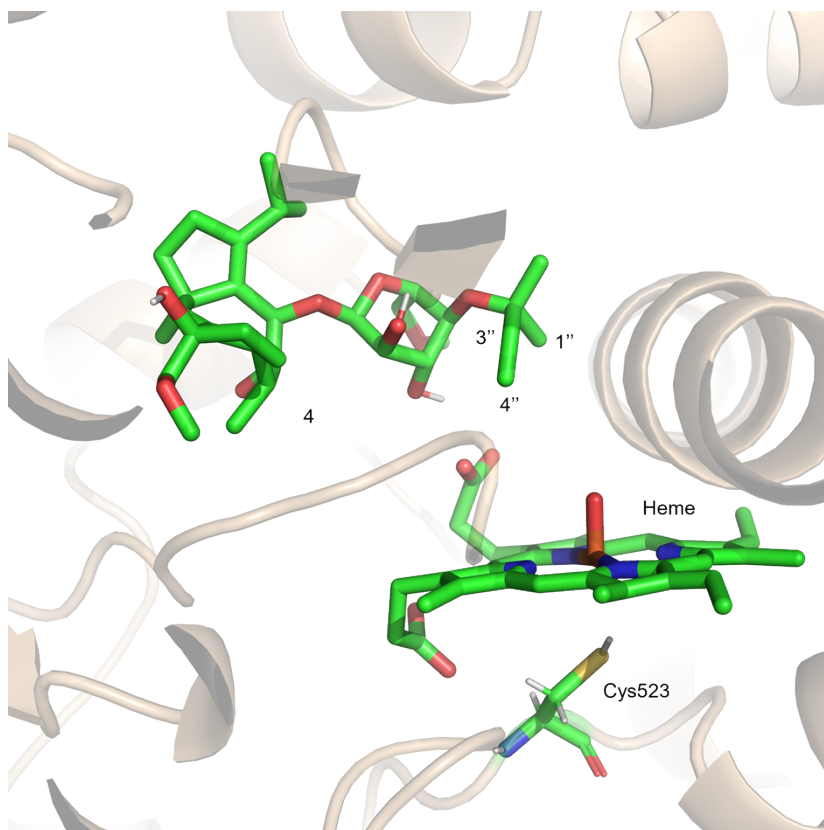

**Figure S 9.** the molecular docking scenario of CtyA with the substrate **4** and the coenzyme Heme. In CtyA, the Cys523 residue coordinates with the Fe in Heme. The reverse prenyl group on the glycoside of the substrate **4** is oriented towards the iron center of Heme.

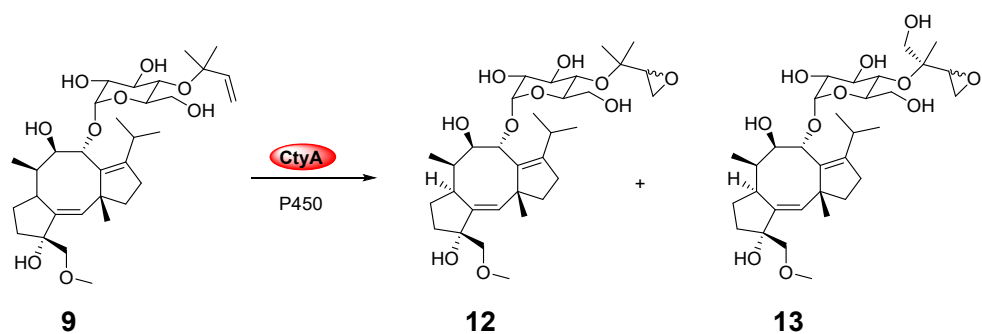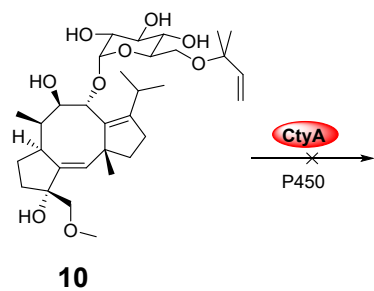

**A**

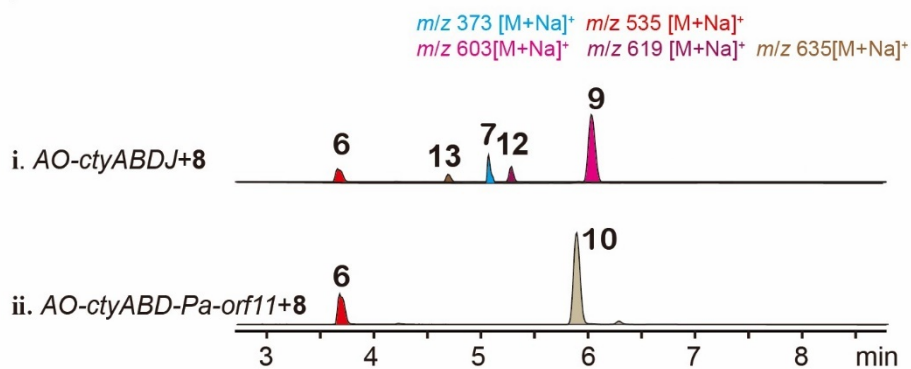

**B**

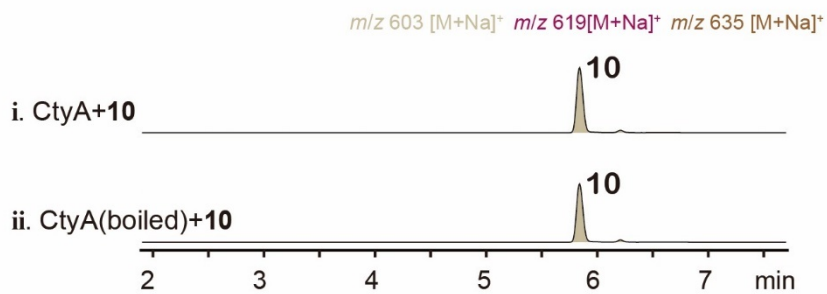

**Figure S 10. A)** EIC chromatography profile of AO-ctyABDJ and AO-ctyABD-Orf11 fed with **8**. **B)** EIC chromatography of microsomes fraction from yeast expressing CtyA reacting with **10**.

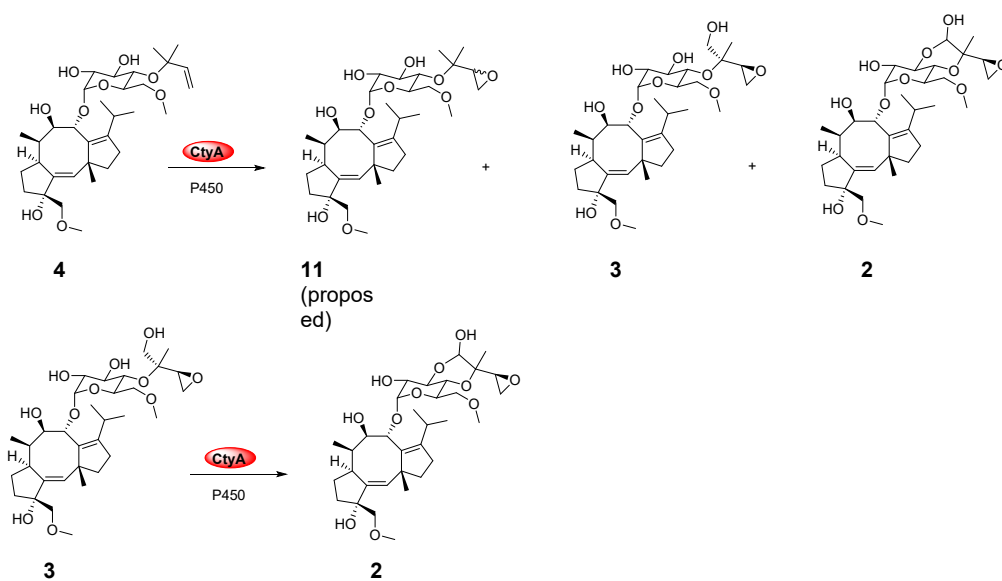

$m/z$  617 [M+Na]<sup>+</sup>  $m/z$  633 [M+Na]<sup>+</sup>  
 $m/z$  649 [M+Na]<sup>+</sup>  $m/z$  647 [M+Na]<sup>+</sup>

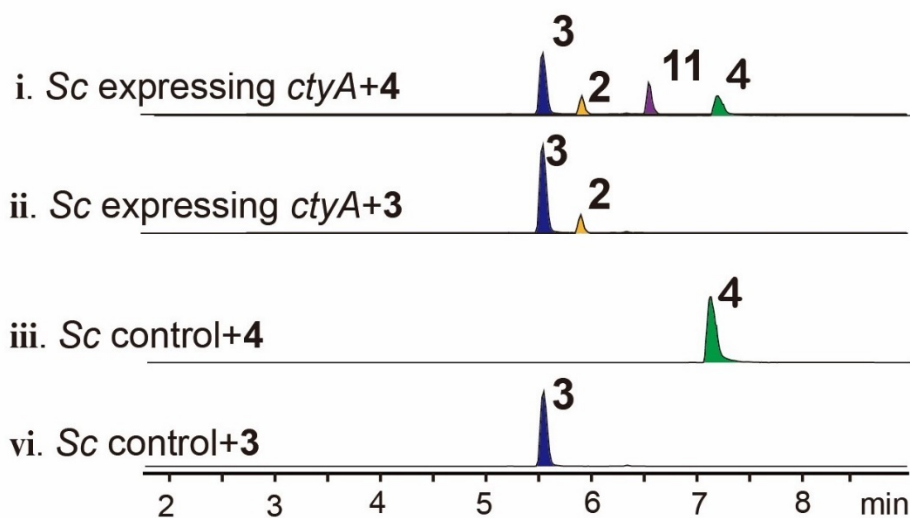

**Figure S 11.** EIC chromatography profile of *Sc* expressing *ctyA* fed with **4** and **3**. **i** and **iii**) *Sc* expressing *ctyA* fed with **4**. **ii** and **iv**) *Sc* expressing *ctyA* fed with **3**

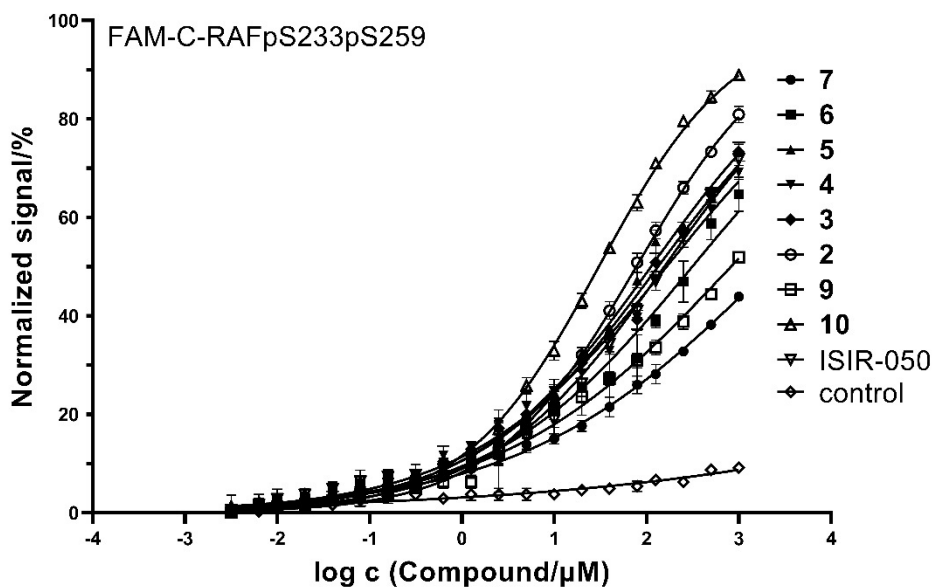

**Figure S 12.** FP measurements of FAM-labeled C-RAF phosphopeptide (20 nM in 10 mM HEPES, 150 mM NaCl, 0.1% Tween-20, 0.1% BSA, pH 7.4) and 14-3-3 $\zeta$  (0.25  $\mu$ M) titrated with different cotylenins to obtain EC<sub>50</sub> values. Error bars indicate the mean  $\pm$  SD of at least three experiments.

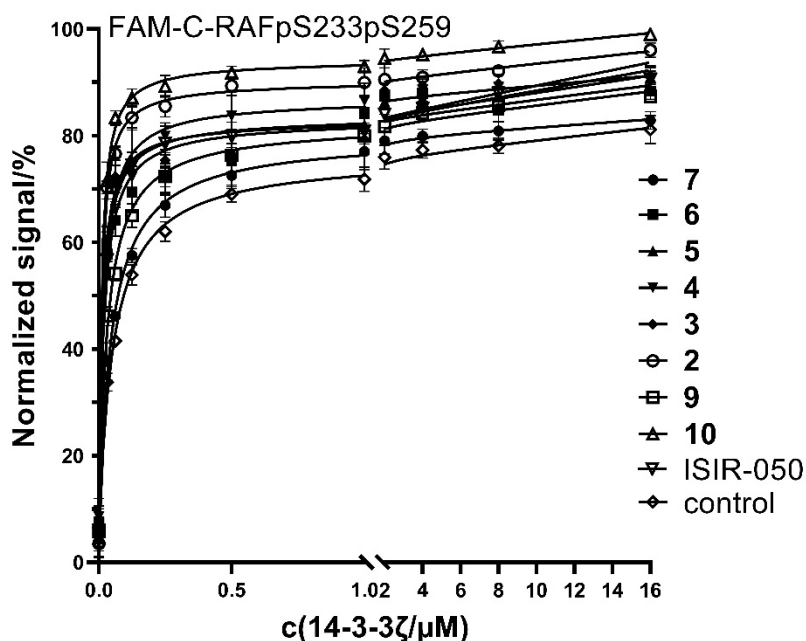

**Figure S 13.** FP measurements of FAM-labeled C-RAF phosphopeptide (20 nM in 10 mM HEPES, 150 mM NaCl, 0.1% Tween-20, 0.1% BSA, pH 7.4) in the absence (control) or presence of 150  $\mu$ M of the different cotylenins titrated with 14-3-3 $\zeta$  to obtain the apparent K<sub>d</sub> of the 14-3-3 $\zeta$ /FAM-labeled C-RAF phosphopeptide interaction. Error bars indicate the mean  $\pm$  SD of at least three experiments.

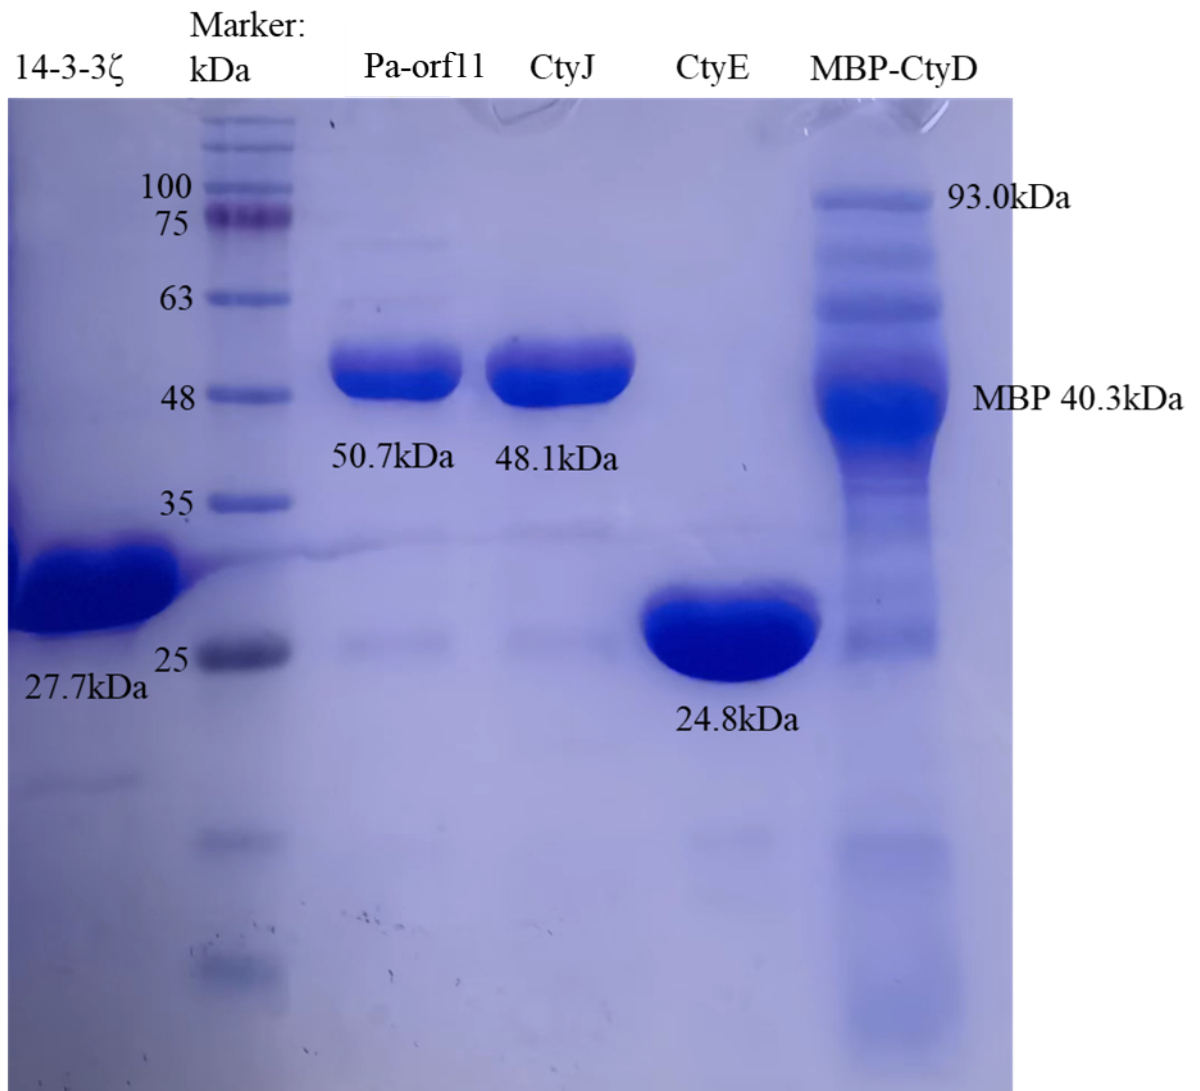

**Figure S 14.** SDS-PAGE of MBP-CtyD, CtyE, CtyJ, Pa-orf11 and 14-3-3ζ purified from *E. coli* BL21.



Figure S 15.  $^1\text{H}$  NMR spectrum of compound Fusicocca 2,10(14)-diene in  $\text{CDCl}_3$  (600 MHz)

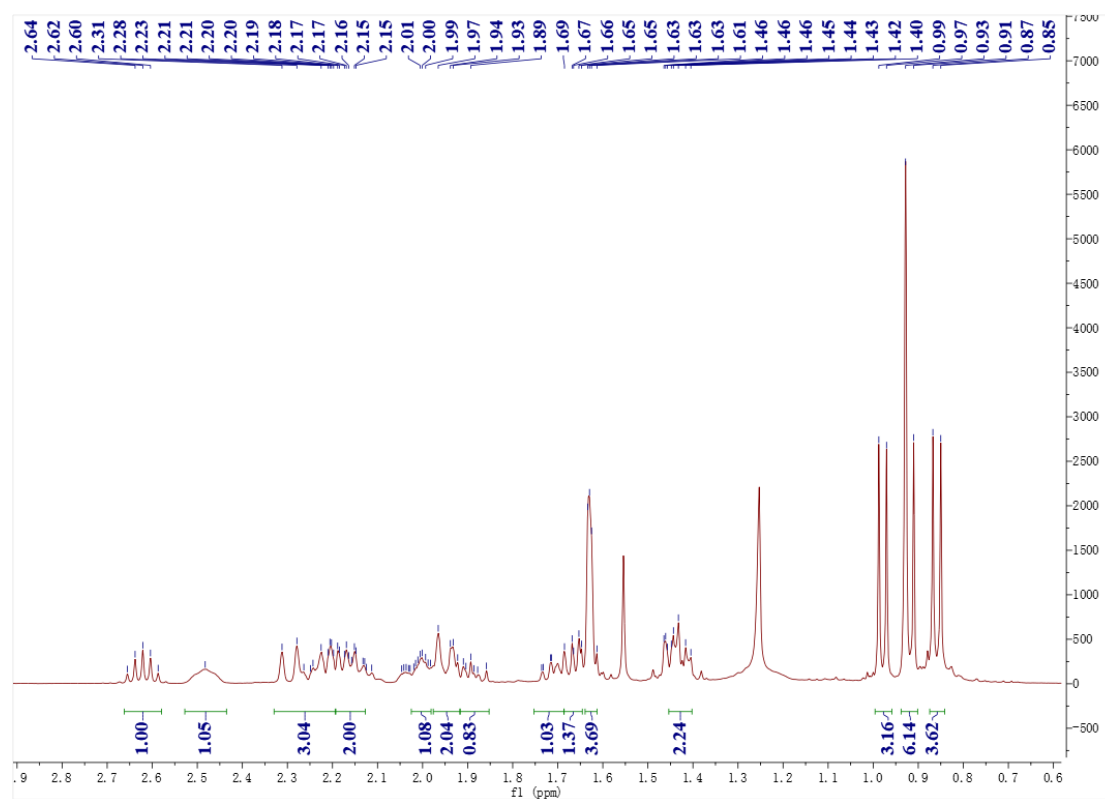

Figure S 16.  $^1\text{H}$  NMR spectrum of compound **8** in  $\text{CDCl}_3$  (600 MHz)

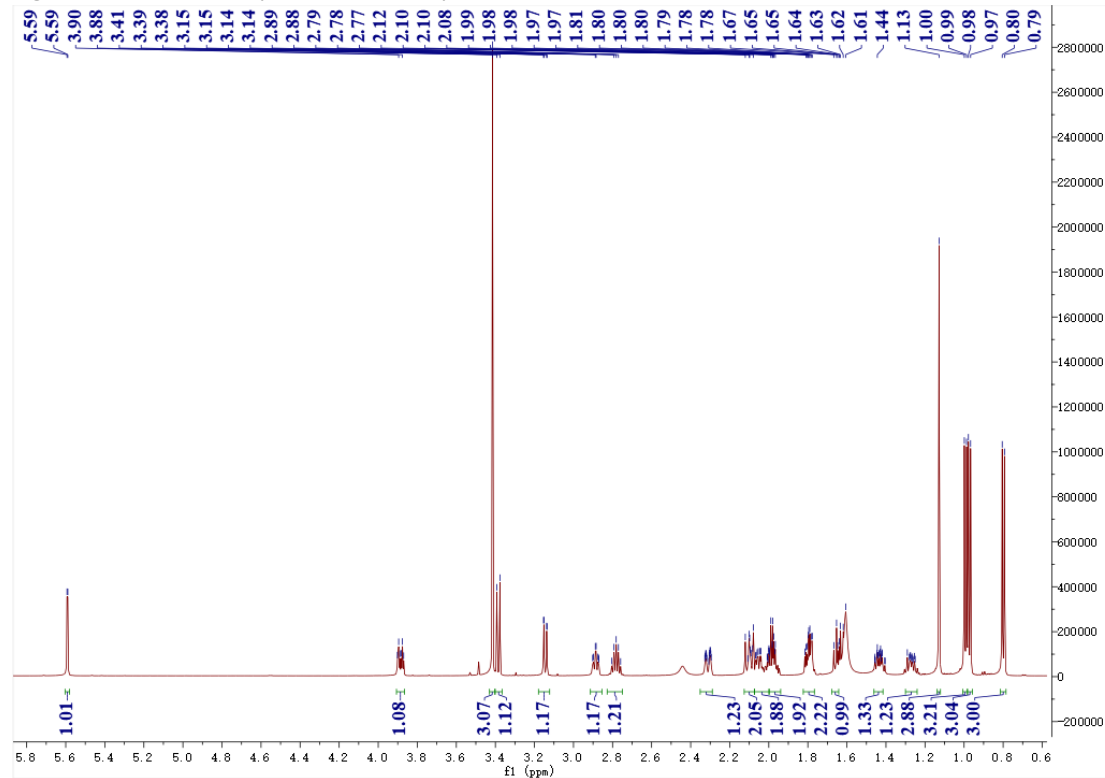

Figure S 17.  $^1\text{H}$  NMR spectrum of compound 7 in  $\text{CDCl}_3$  (600 MHz)

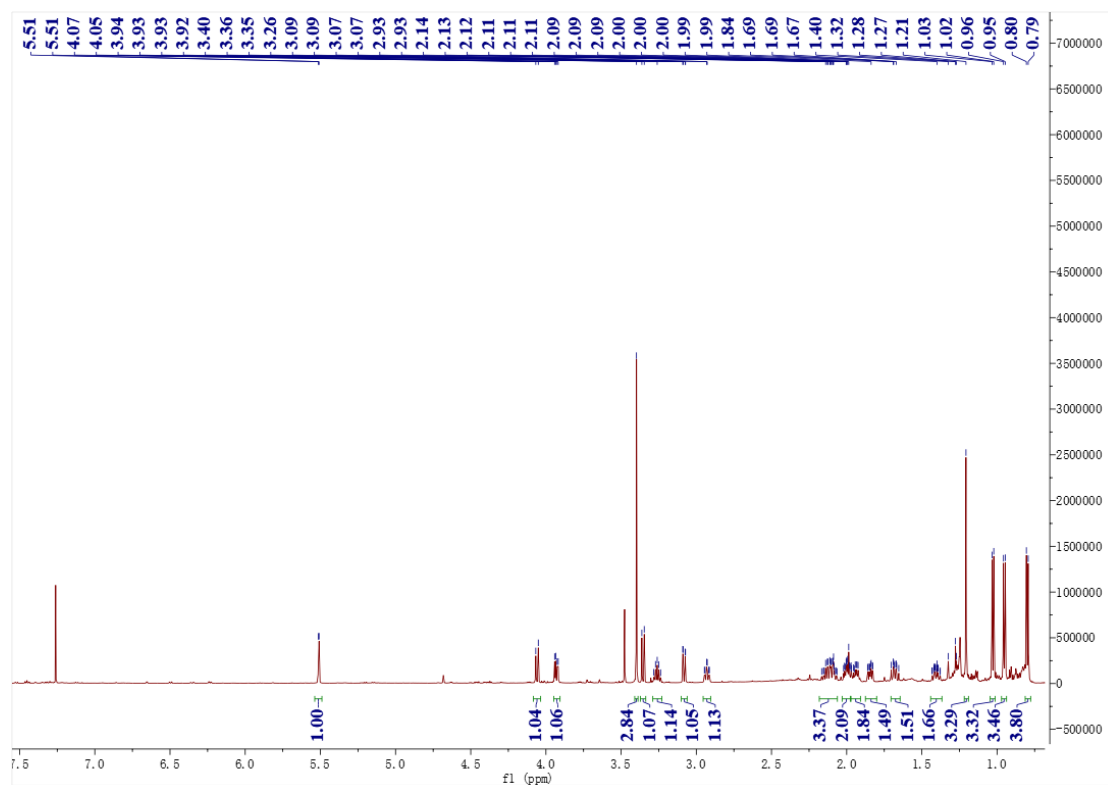

Figure S 18.  $^{13}\text{C}$  NMR spectrum of compound 7 in  $\text{CDCl}_3$  (150 MHz)

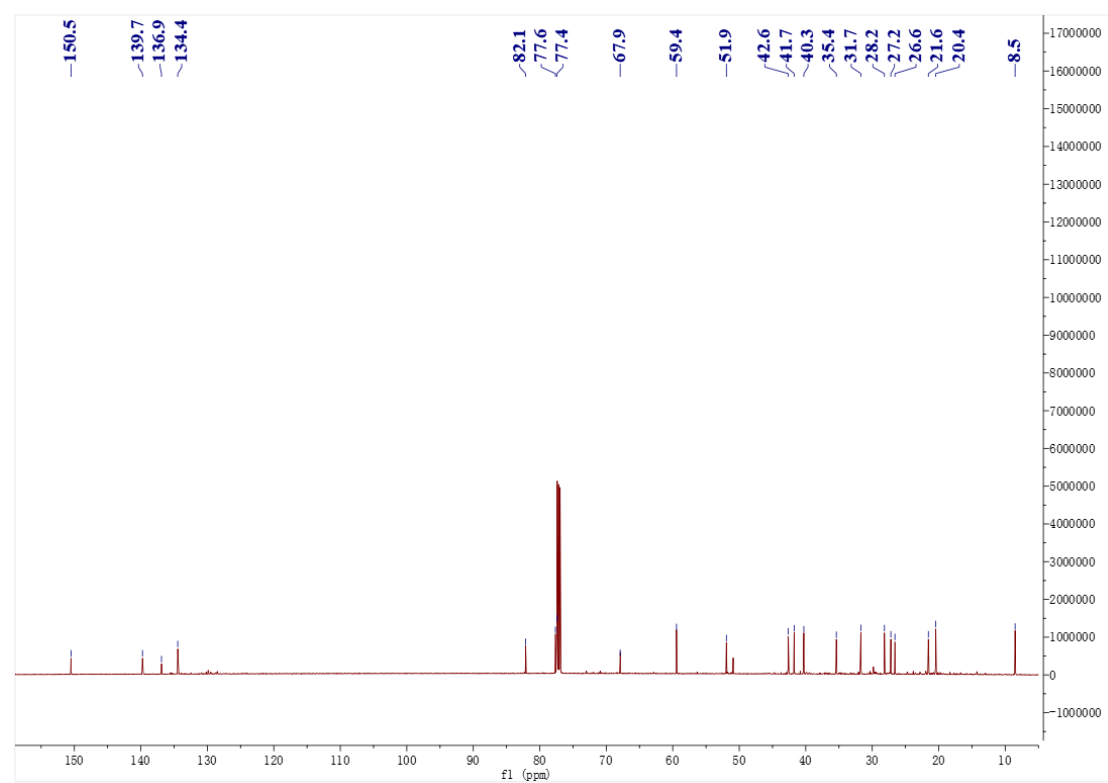

Figure S 19.  $^1\text{H}$  NMR spectrum of compound **6** in  $\text{CD}_3\text{COCD}_3$  (600 MHz)

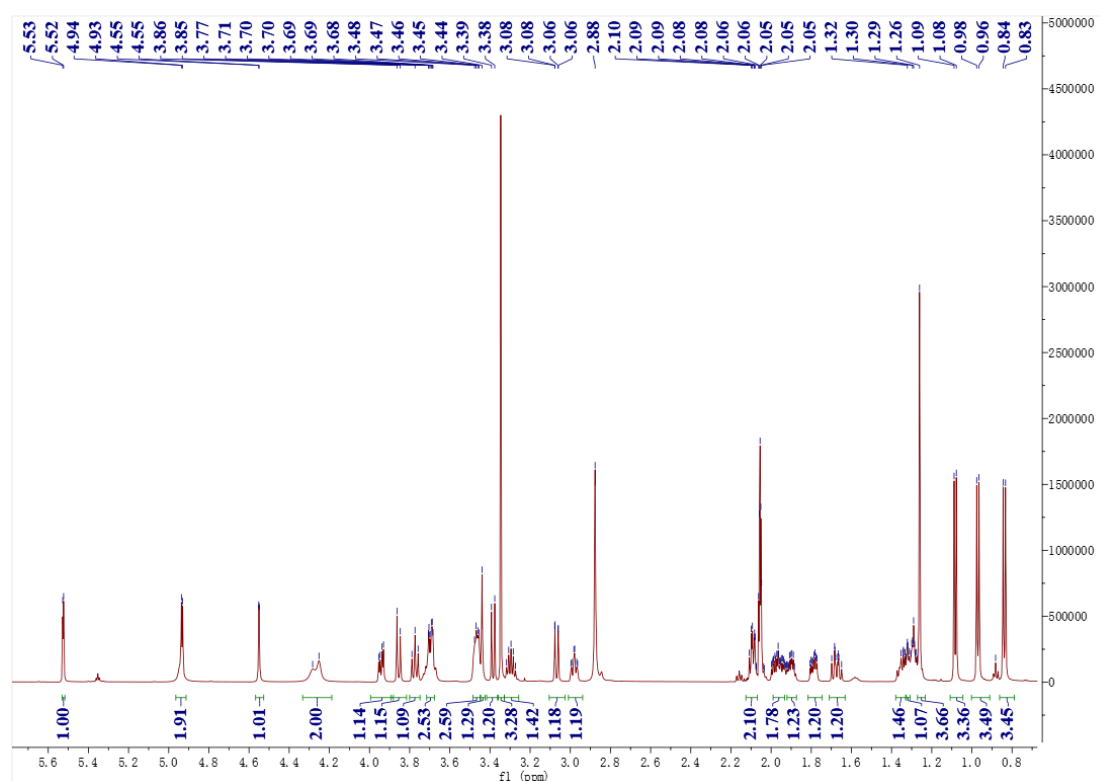

Figure S 20.  $^1\text{H}$  NMR spectrum of compound **6** in  $\text{CD}_3\text{OD}$  (600 MHz)

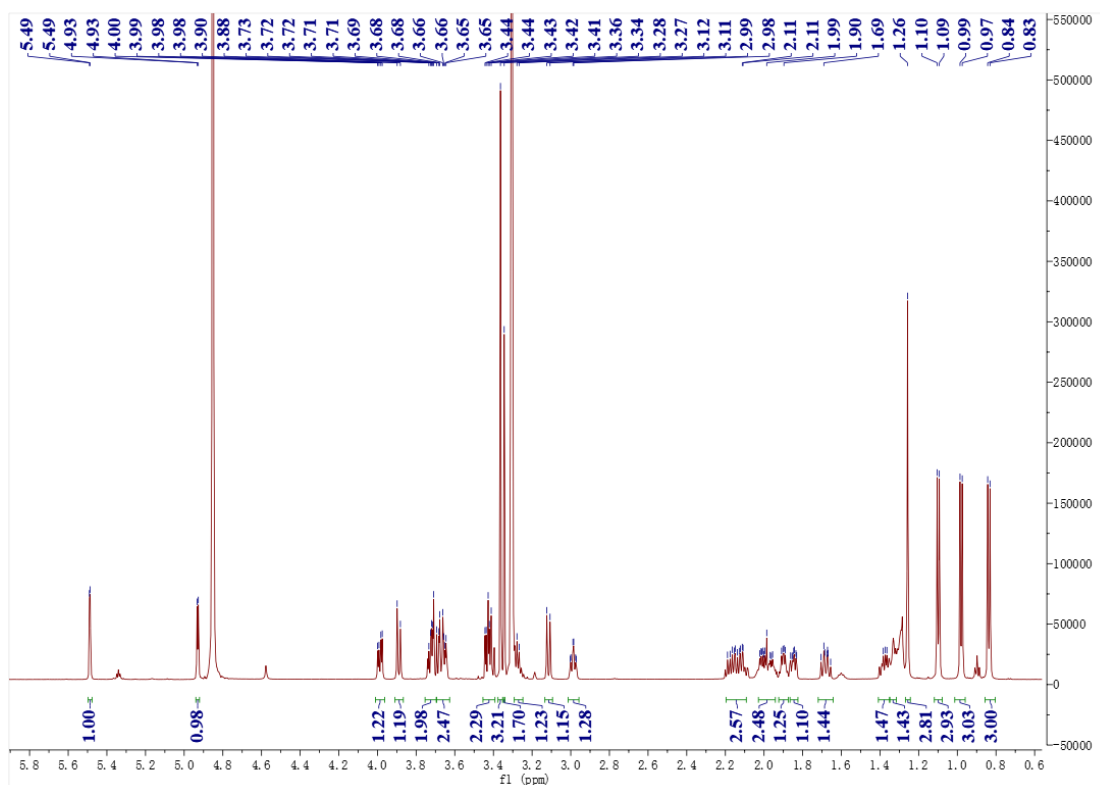

Figure S 21.  $^{13}\text{C}$  NMR spectrum of compound 6 in  $\text{CD}_3\text{OD}$  (150 MHz)

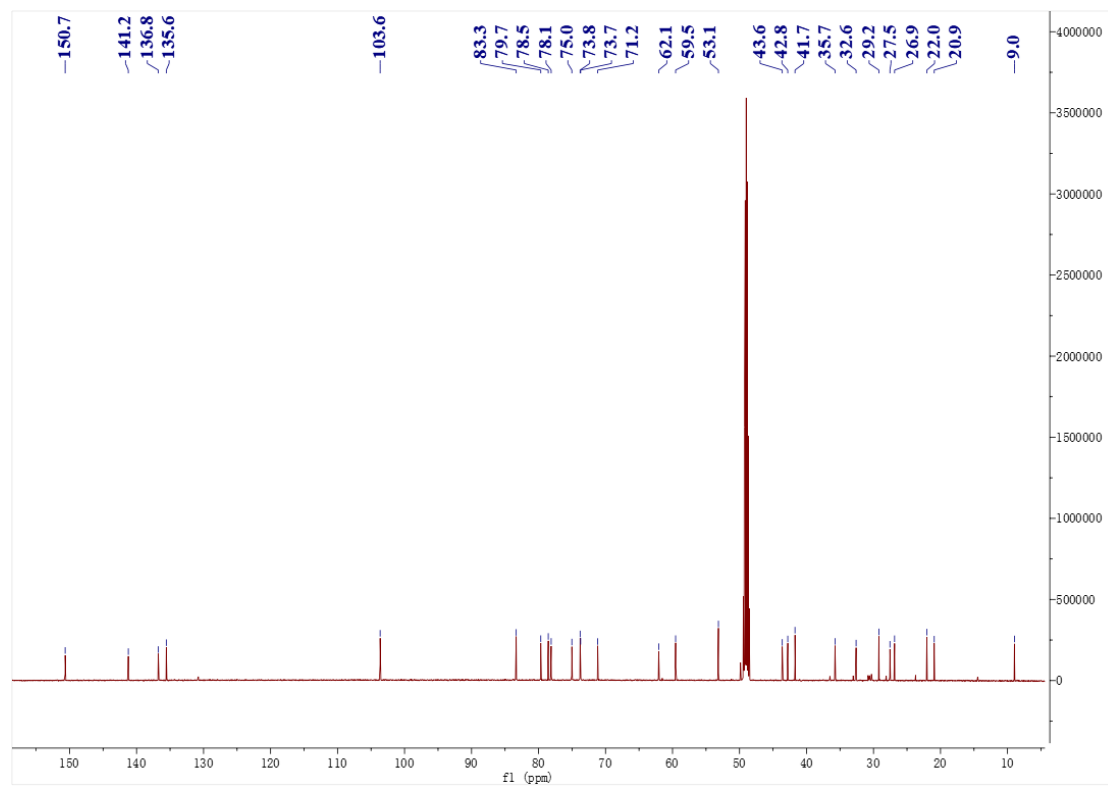

Figure S 22. <sup>1</sup>H NMR spectrum of compound 5 in CD<sub>3</sub>COCD<sub>3</sub> (600 MHz)

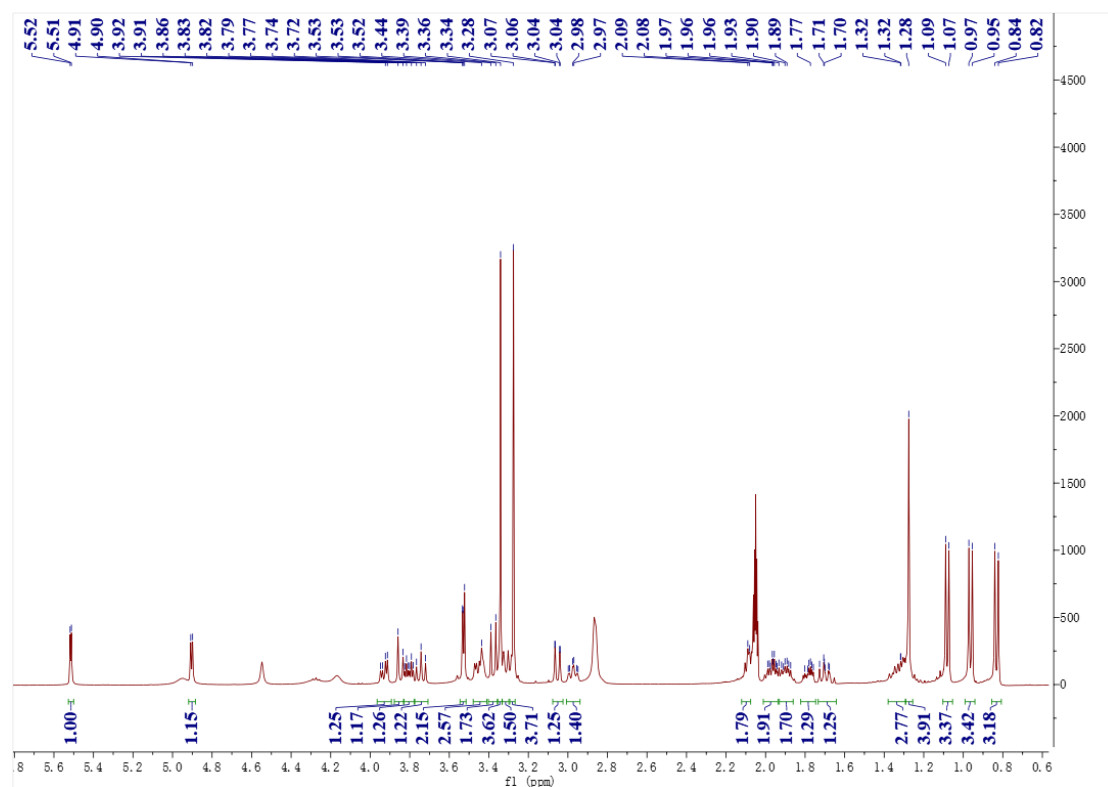

Figure S 23. <sup>1</sup>H NMR spectrum of compound 5 in CD<sub>3</sub>OD (600 MHz)

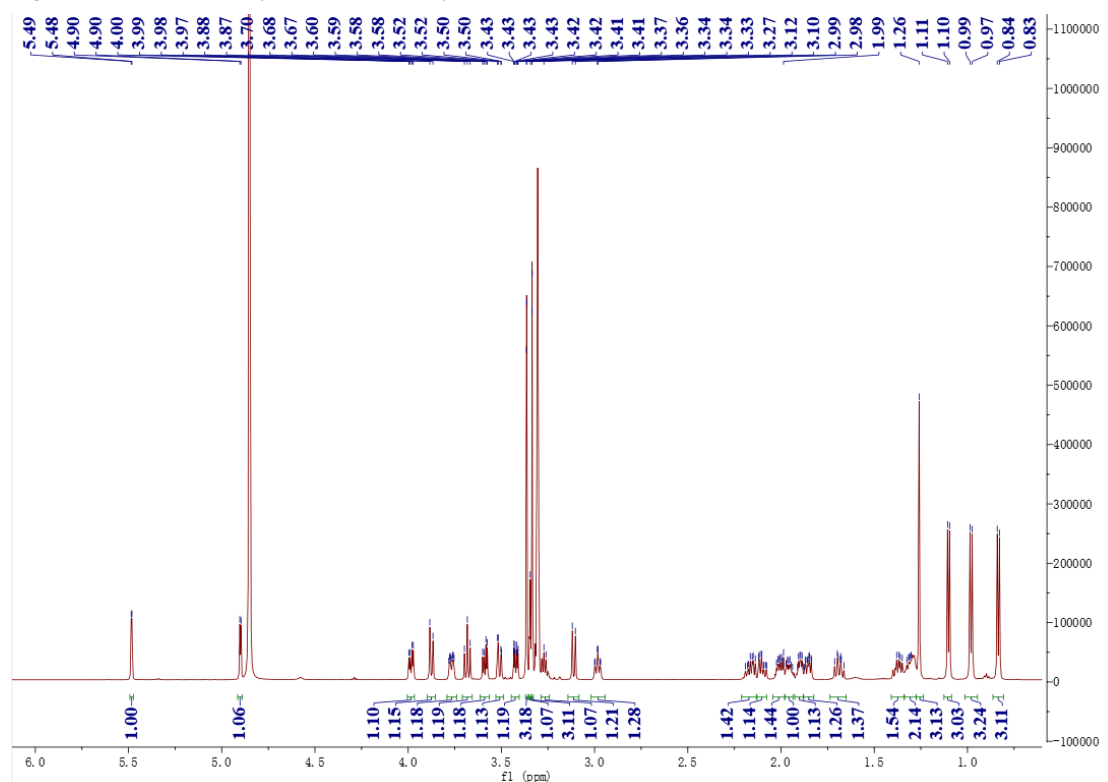

Figure S 24.  $^{13}\text{C}$  NMR spectrum of compound 5 in  $\text{CD}_3\text{OD}$  (150 MHz)

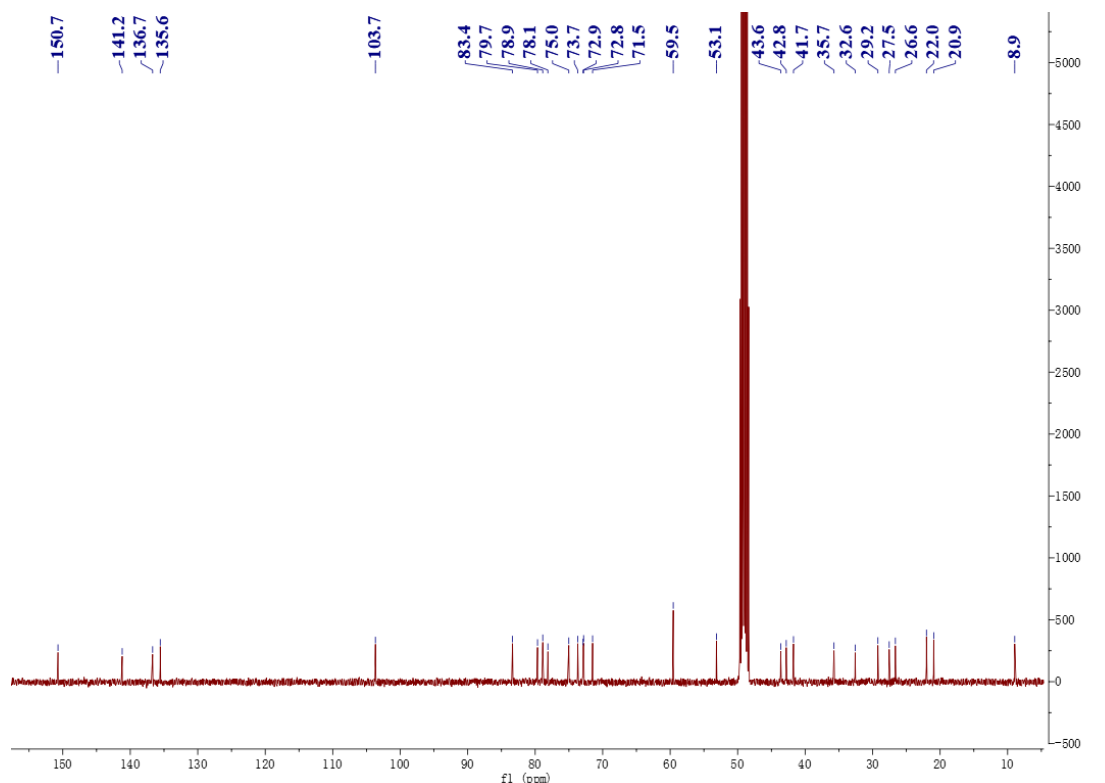

Figure S 25. HSQC spectrum of compound 5 in  $\text{CD}_3\text{OD}$  (600 MHz)

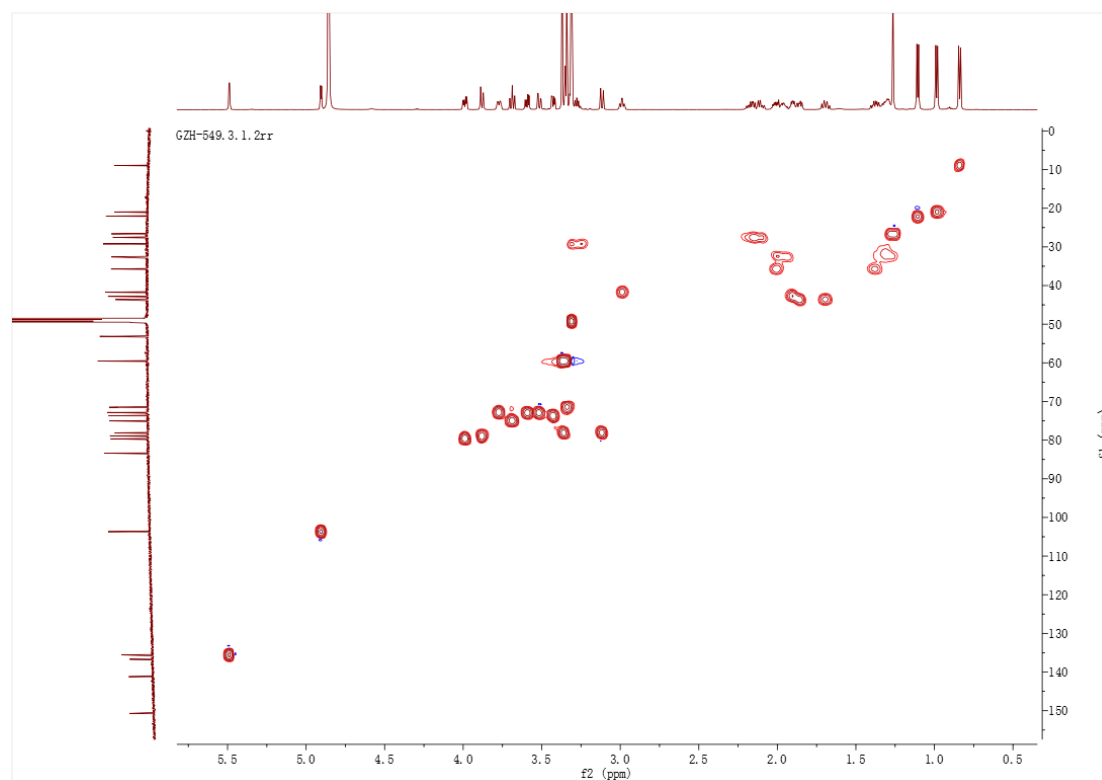

Figure S 26.  $^1\text{H}$  NMR spectrum of compound **4** in  $\text{CD}_3\text{COCD}_3$  (600 MHz)

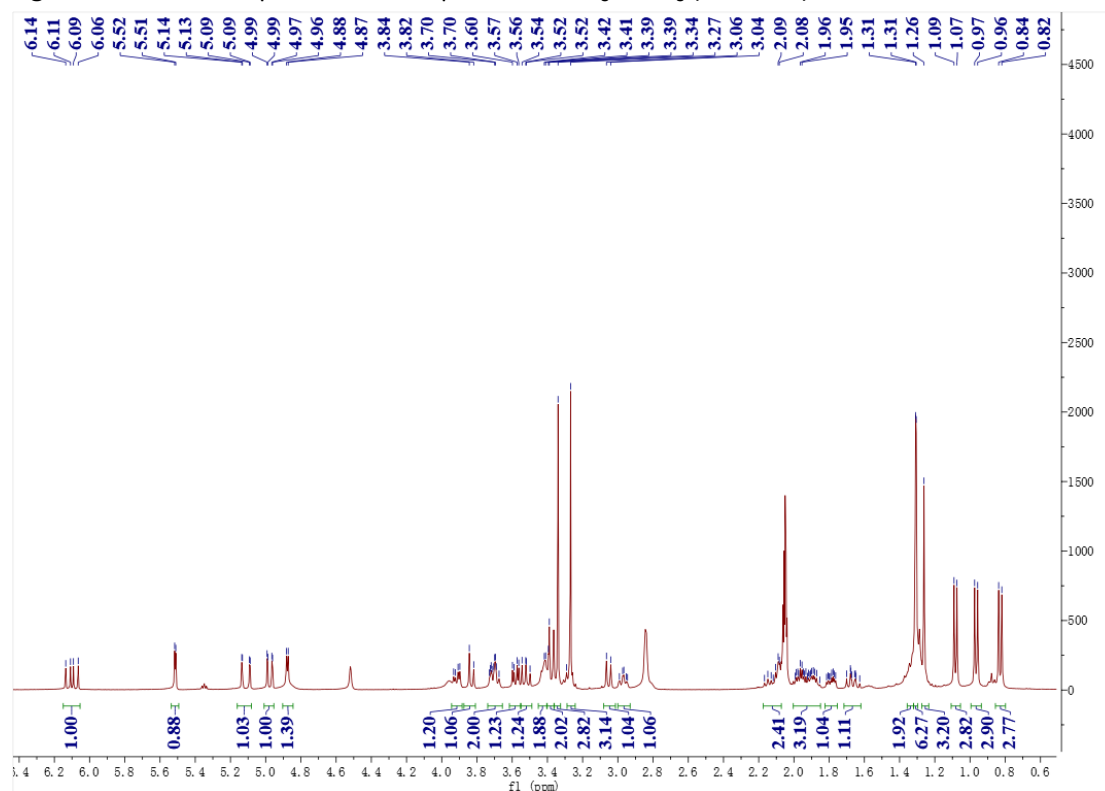

Figure S 27.  $^1\text{H}$  NMR spectrum of compound **4** in  $\text{CD}_3\text{OD}$  (600 MHz)

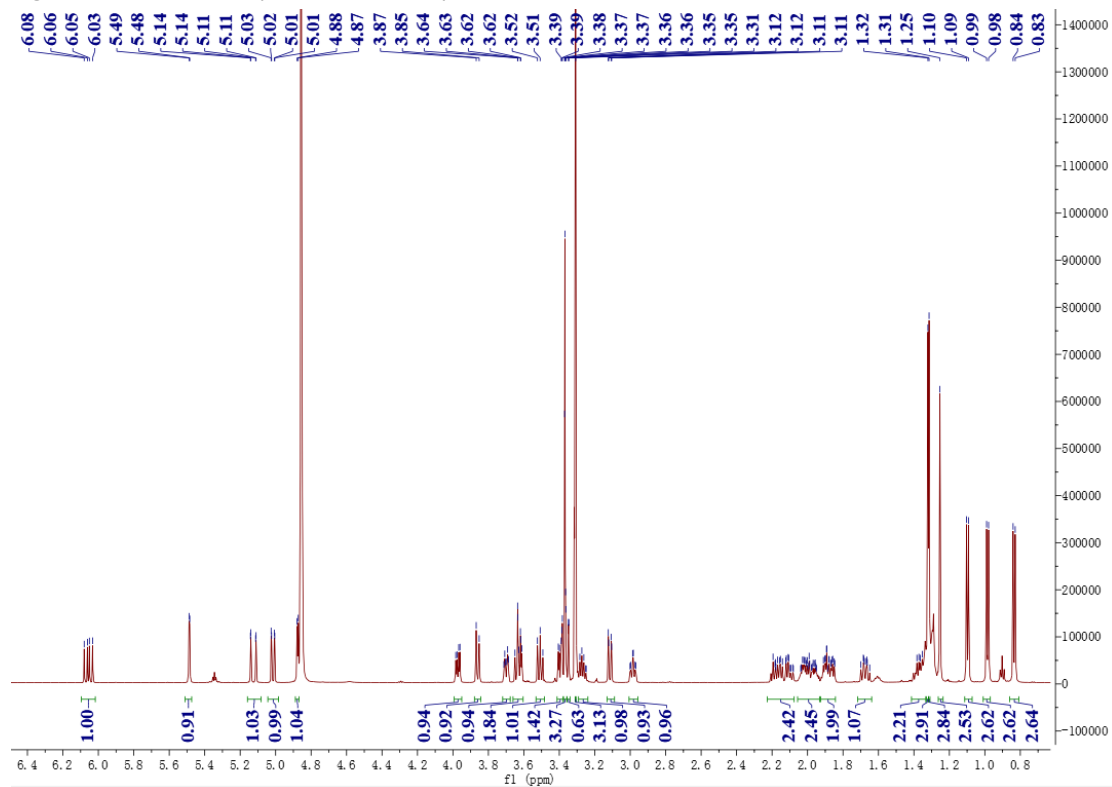

Figure S 28.  $^{13}\text{C}$  NMR spectrum of compound 4 in  $\text{CD}_3\text{OD}$  (150 MHz)

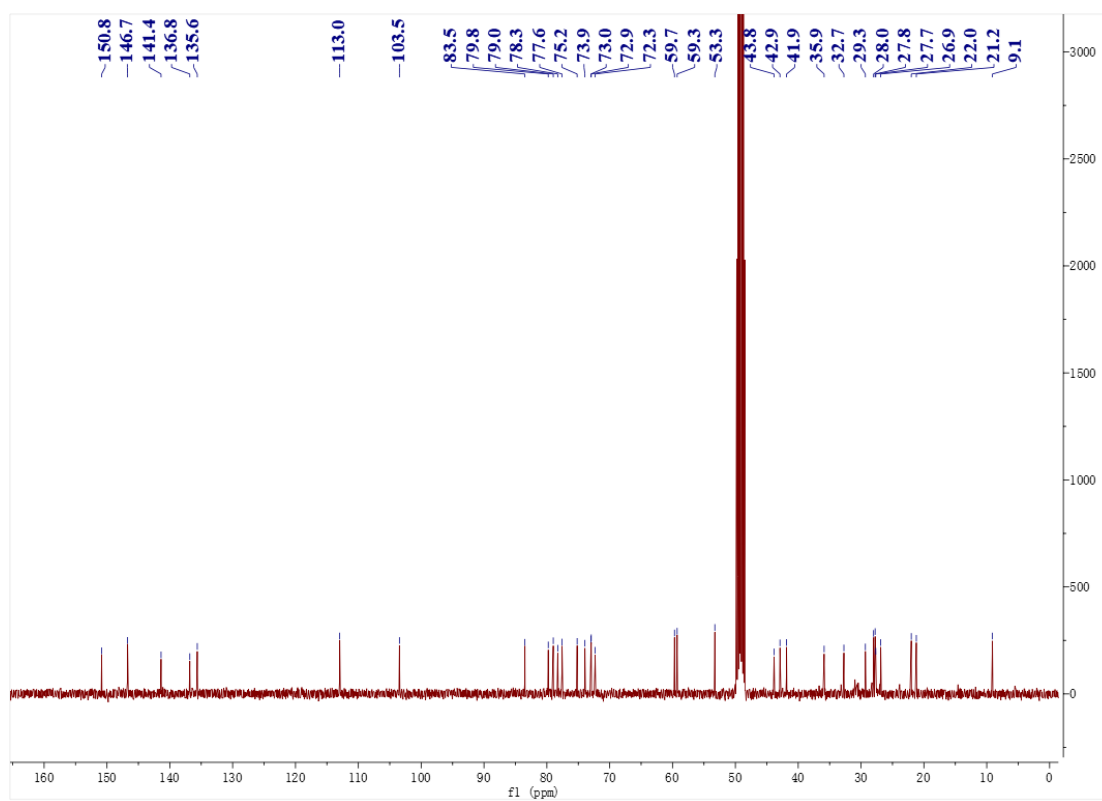



Figure S 29.  $^1\text{H}$  NMR spectrum of compound **3** in  $\text{CD}_3\text{COCD}_3$  (600 MHz)

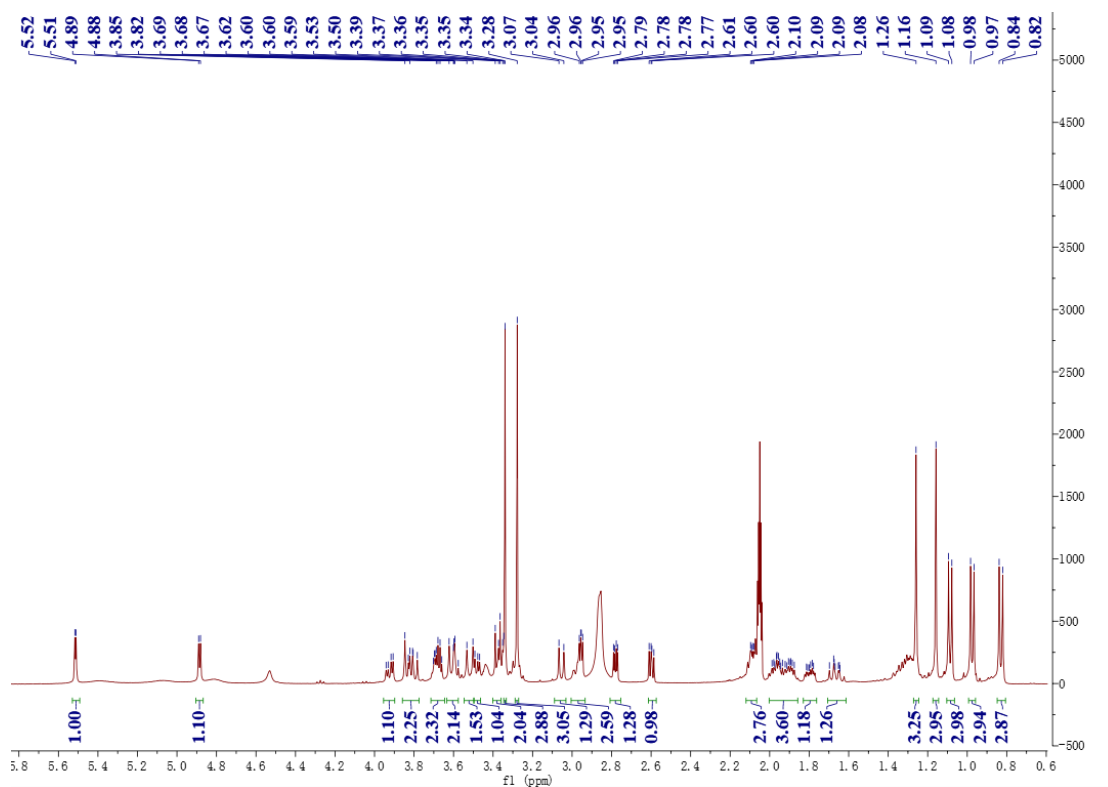

Figure S 30.  $^1\text{H}$  NMR spectrum of compound **3** in  $\text{CD}_3\text{OD}$  (600 MHz)

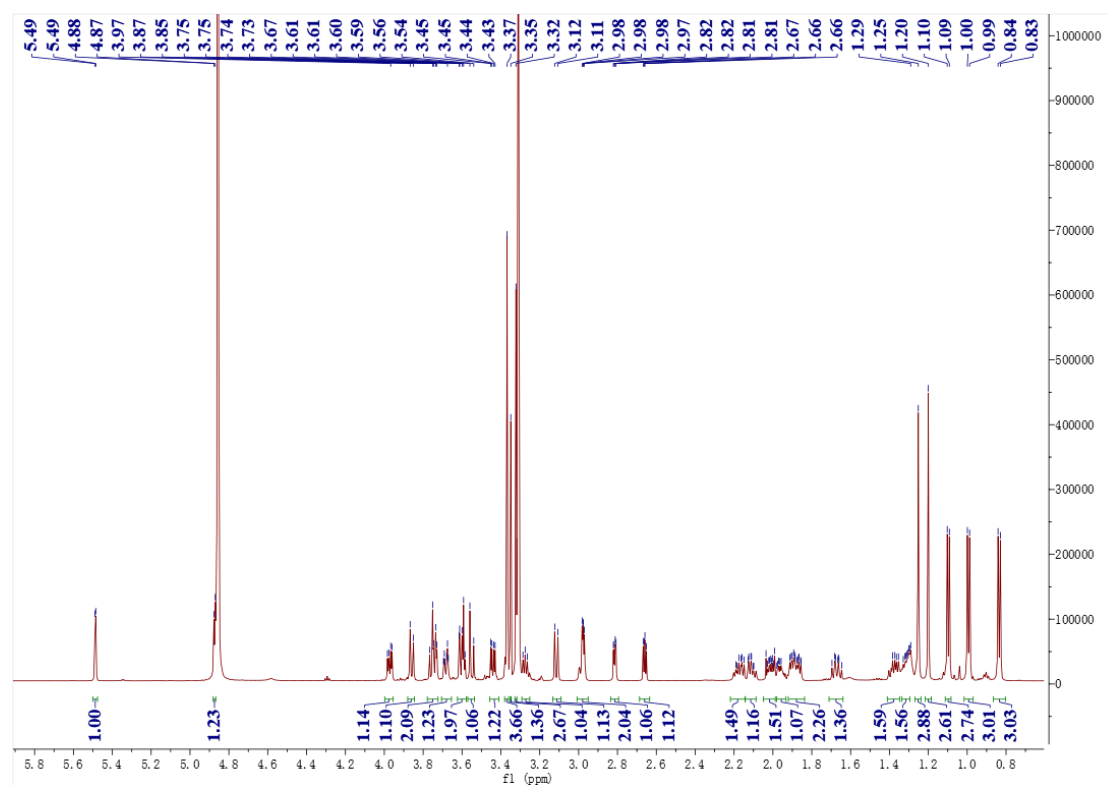

Figure S 31.  $^{13}\text{C}$  NMR spectrum of compound **3** in  $\text{CD}_3\text{OD}$  (150 MHz)

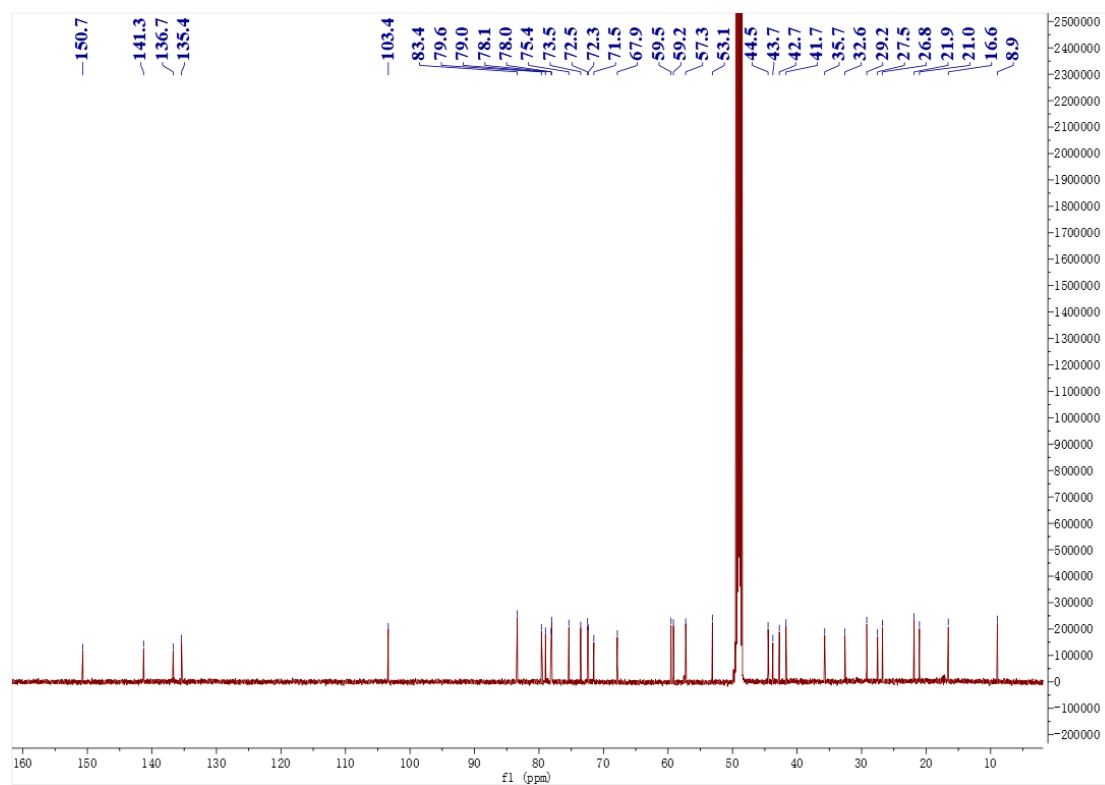

Figure S 32. HSQC spectrum of compound **3** in  $\text{CD}_3\text{OD}$  (600 MHz)

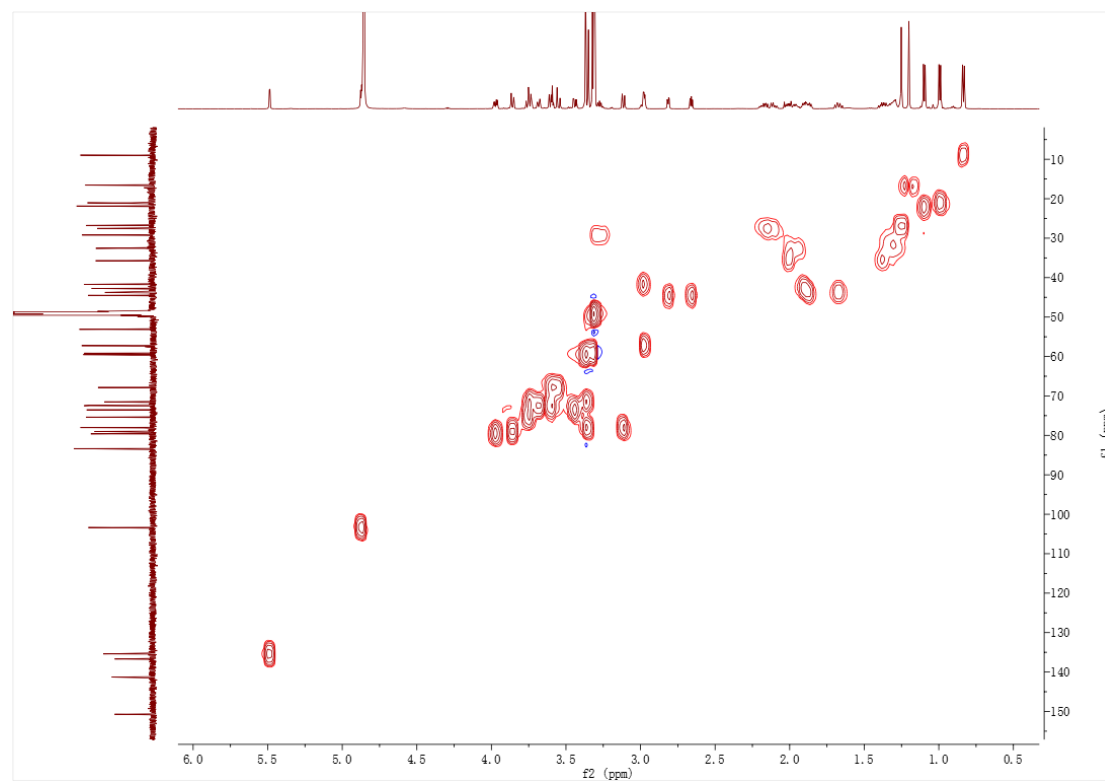

Figure S 33.  $^1\text{H}$  NMR spectrum of compound **2** in  $\text{CD}_3\text{COCD}_3$  (600 MHz)

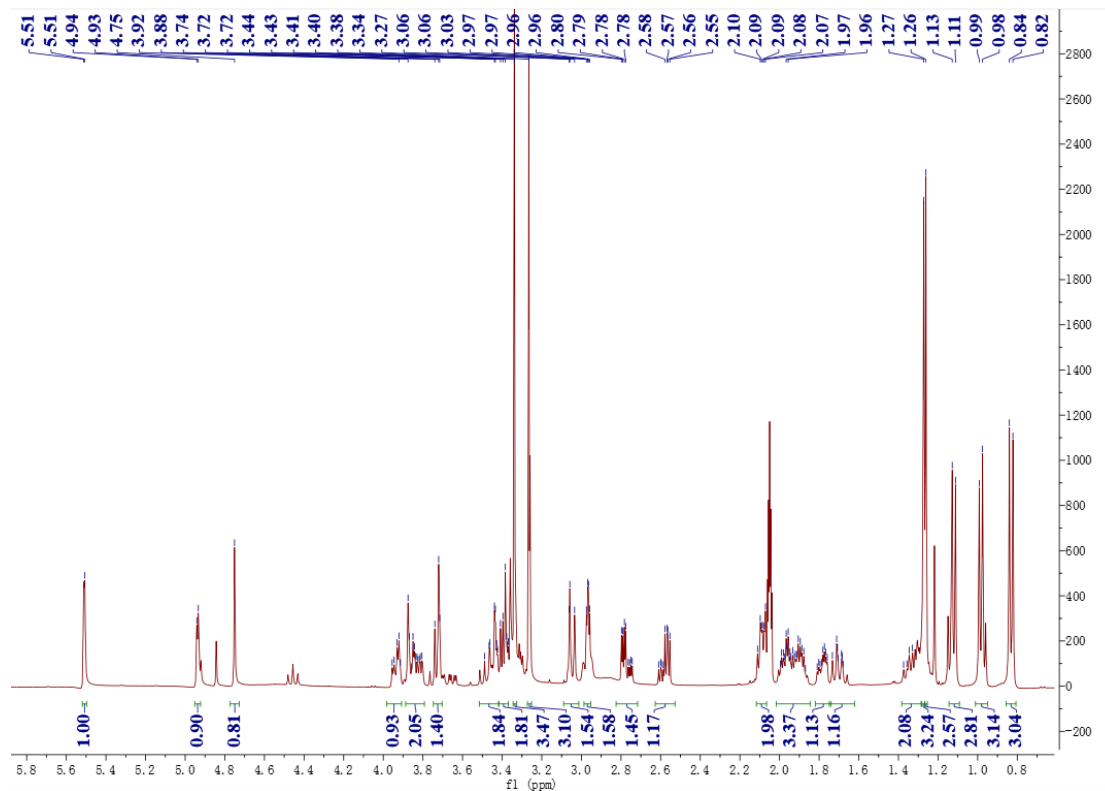

Figure S 34.  $^1\text{H}$  NMR spectrum of compound **2** in  $\text{CD}_3\text{OD}$  (600 MHz)

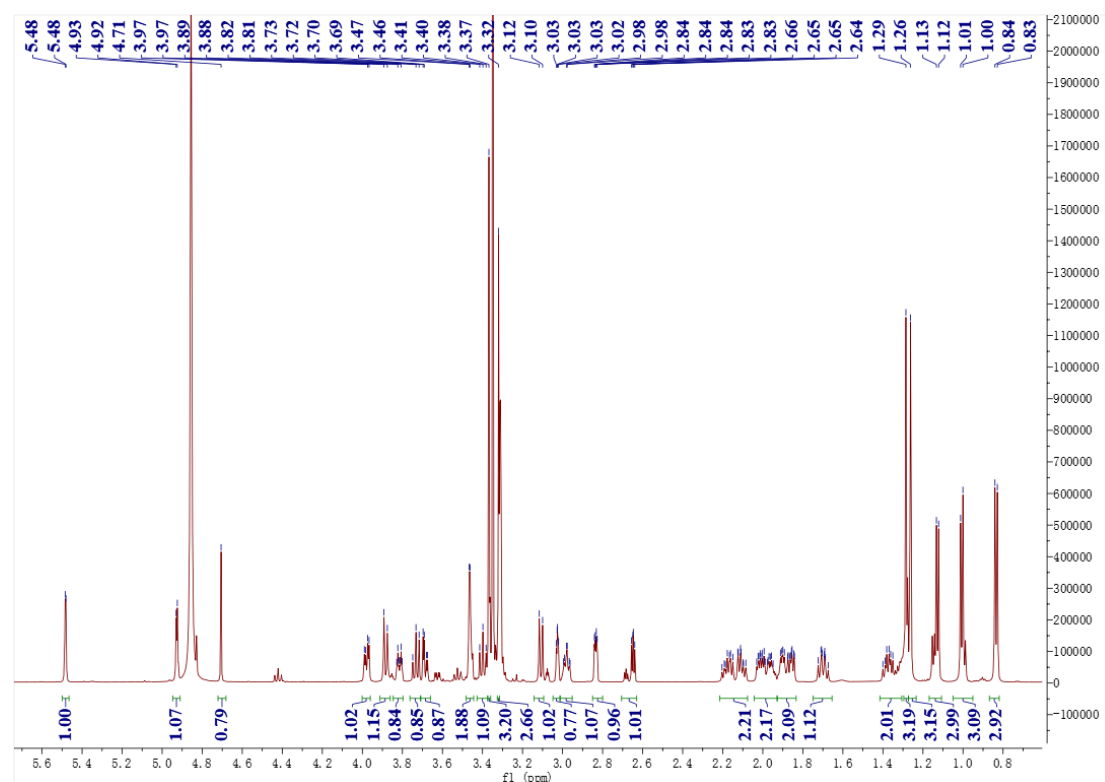

Figure S 35.  $^{13}\text{C}$  NMR spectrum of compound 2 in  $\text{CD}_3\text{OD}$  (150 MHz)

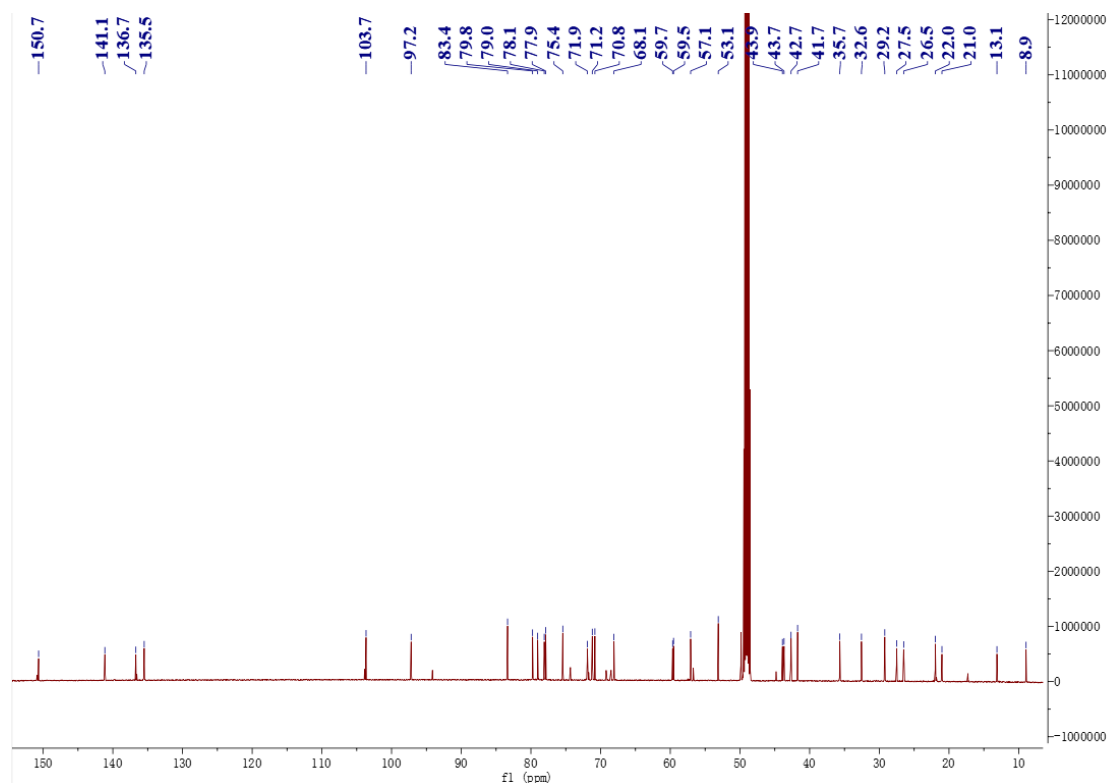

Figure S 36. HSQC spectrum of compound 2 in  $\text{CD}_3\text{OD}$  (600 MHz)

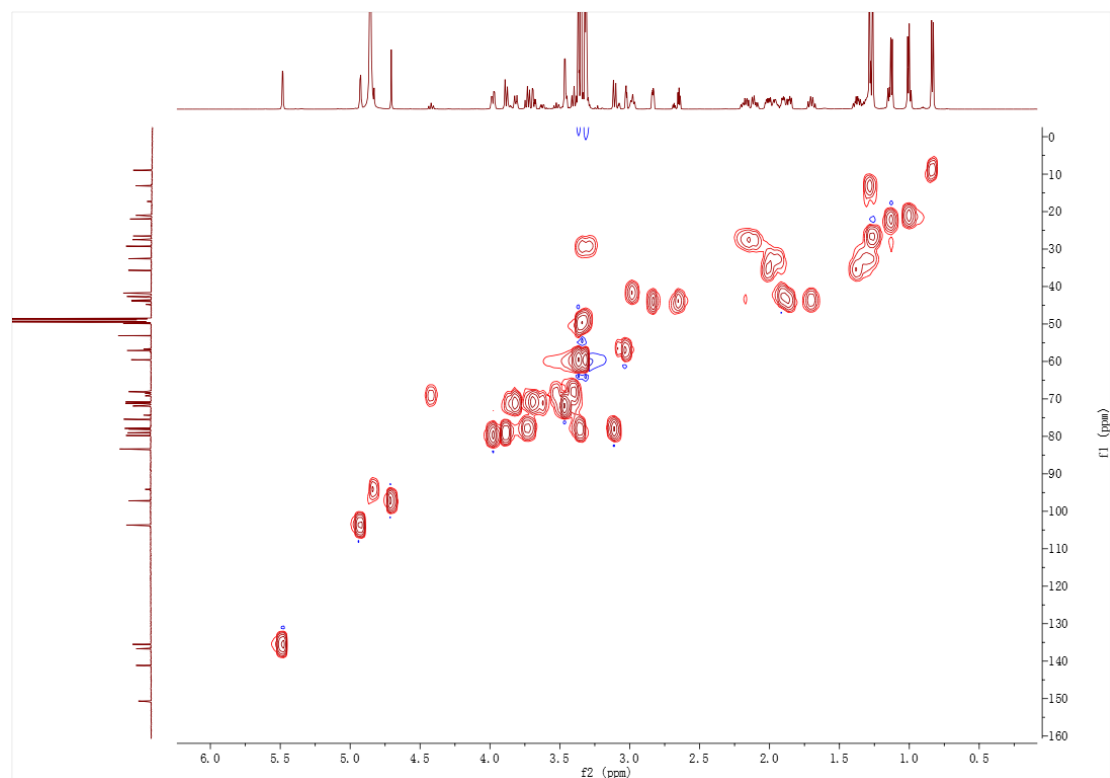

Figure S 37.  $^1\text{H}$  NMR spectrum of compound **12** in  $\text{CD}_3\text{OD}$  (600 MHz)

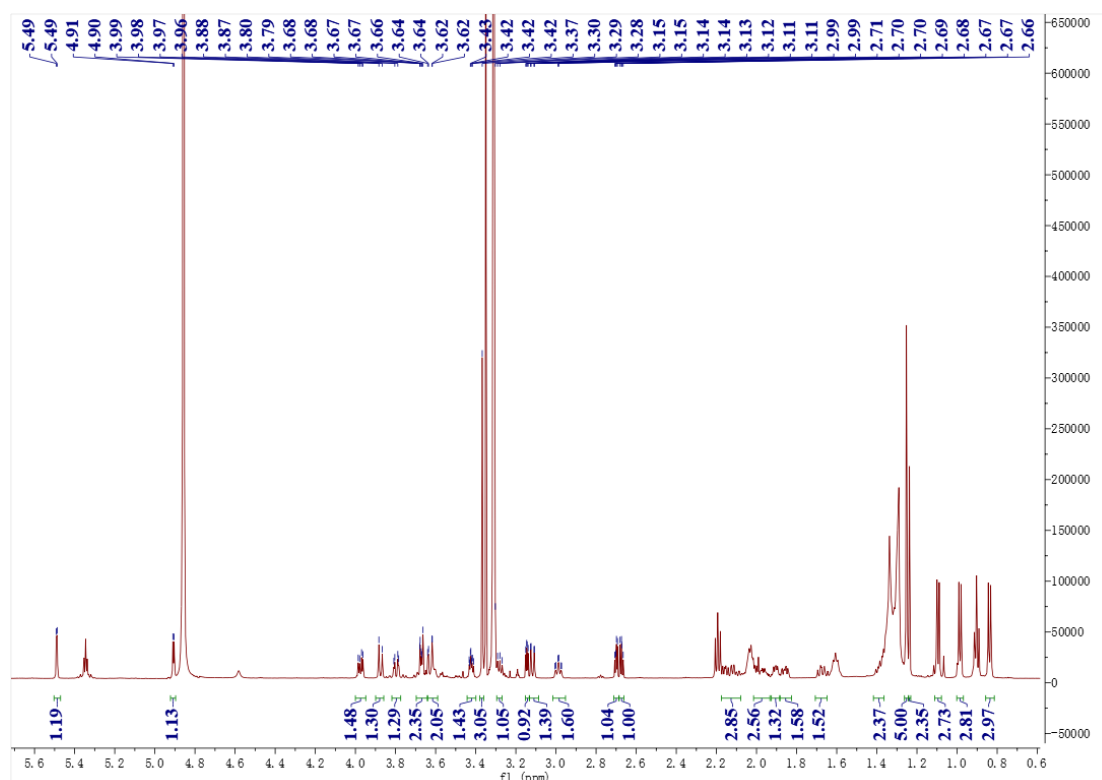

Figure S 38.  $^{13}\text{C}$  NMR and DEPT spectrum of compound **12** in  $\text{CD}_3\text{OD}$  (150 MHz)

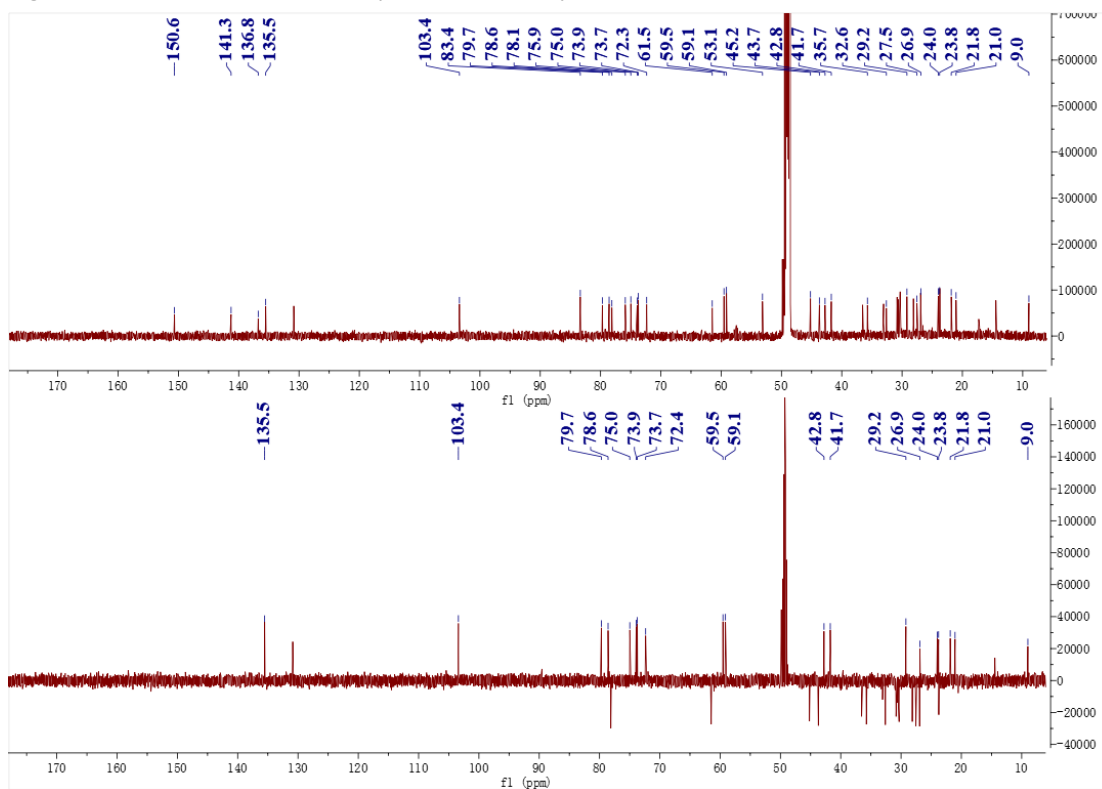

Figure S 39. HSQC spectrum of compound **12** in CD<sub>3</sub>OD (600 MHz)

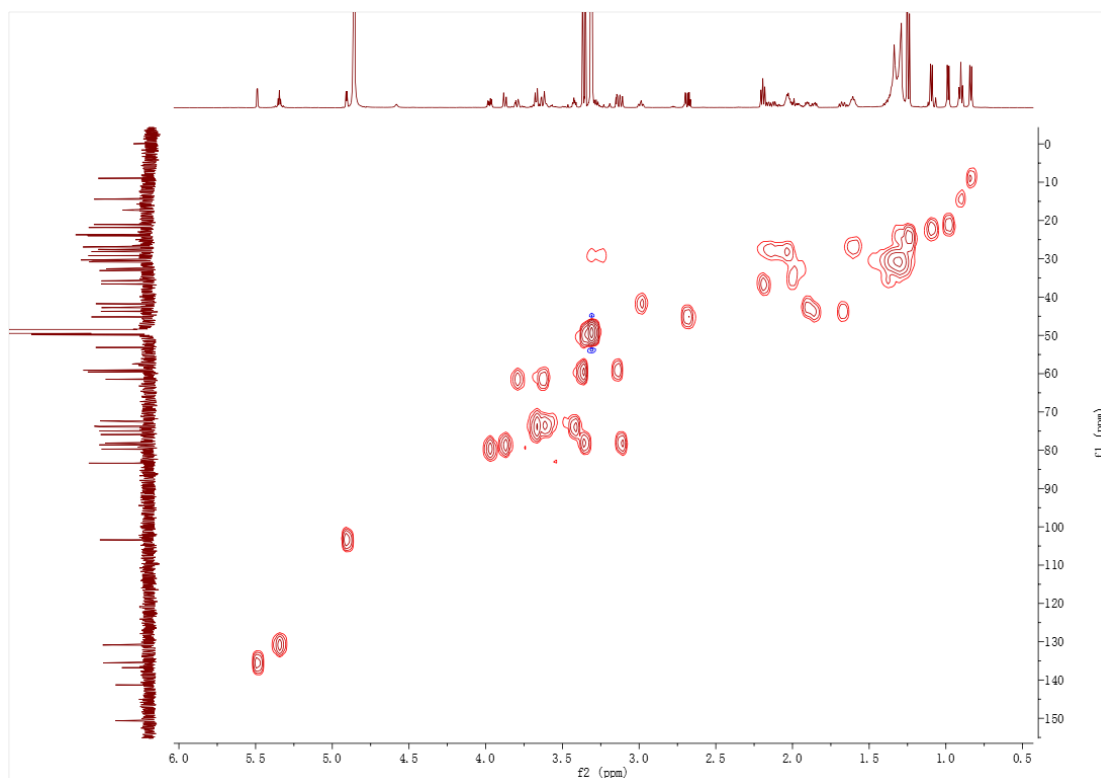

Figure S 40. HMBC spectrum of compound **12** in CD<sub>3</sub>OD (600 MHz)

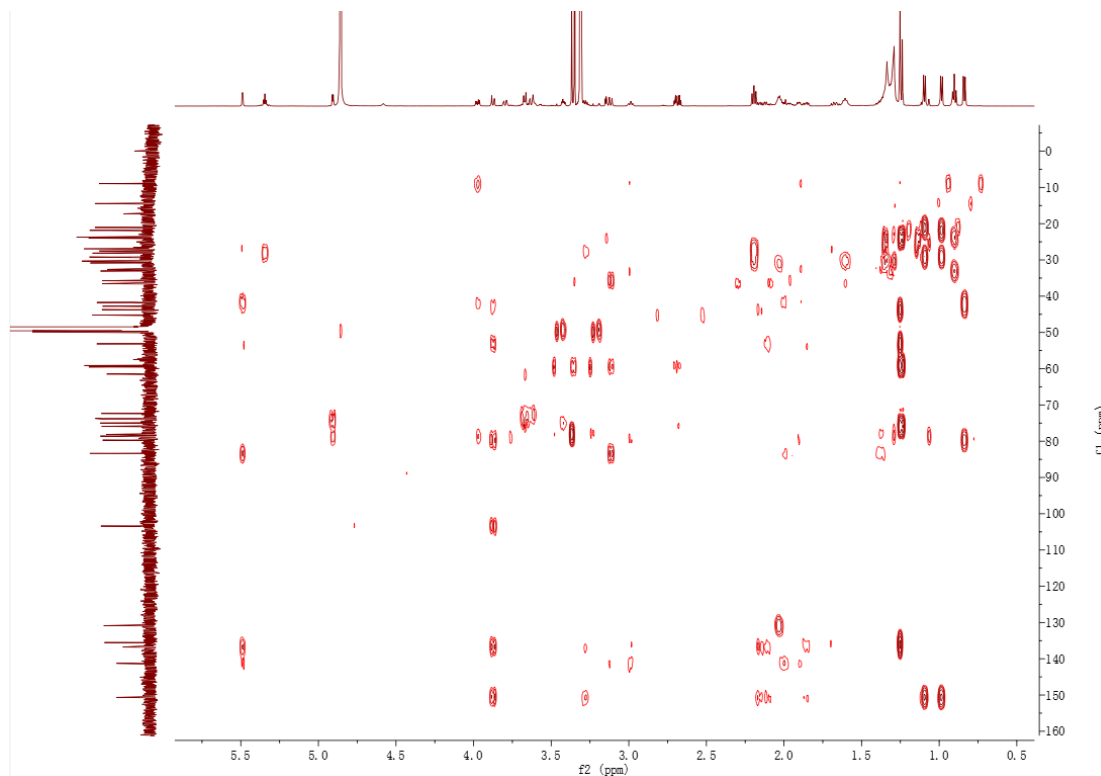

Figure S 41.  $^1\text{H}$ - $^1\text{H}$  COSY spectrum of compound **12** in  $\text{CD}_3\text{OD}$  (600 MHz)

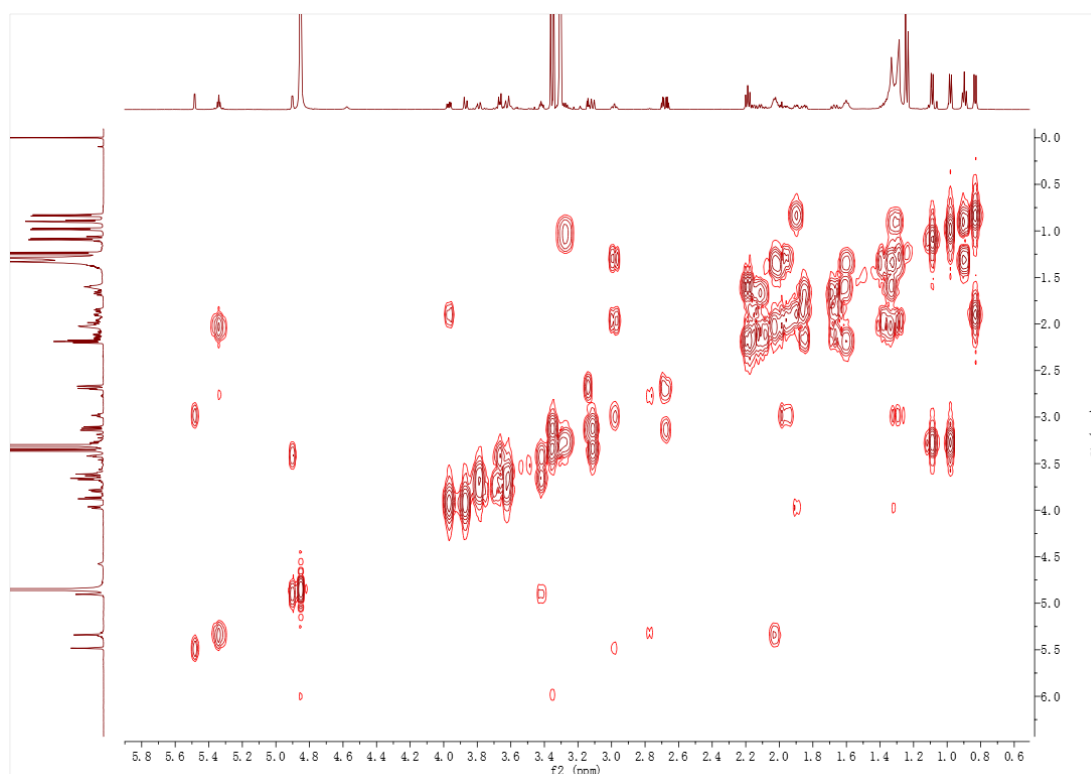

Figure S 42. NOESY spectrum of compound **12** in  $\text{CD}_3\text{OD}$  (600 MHz)

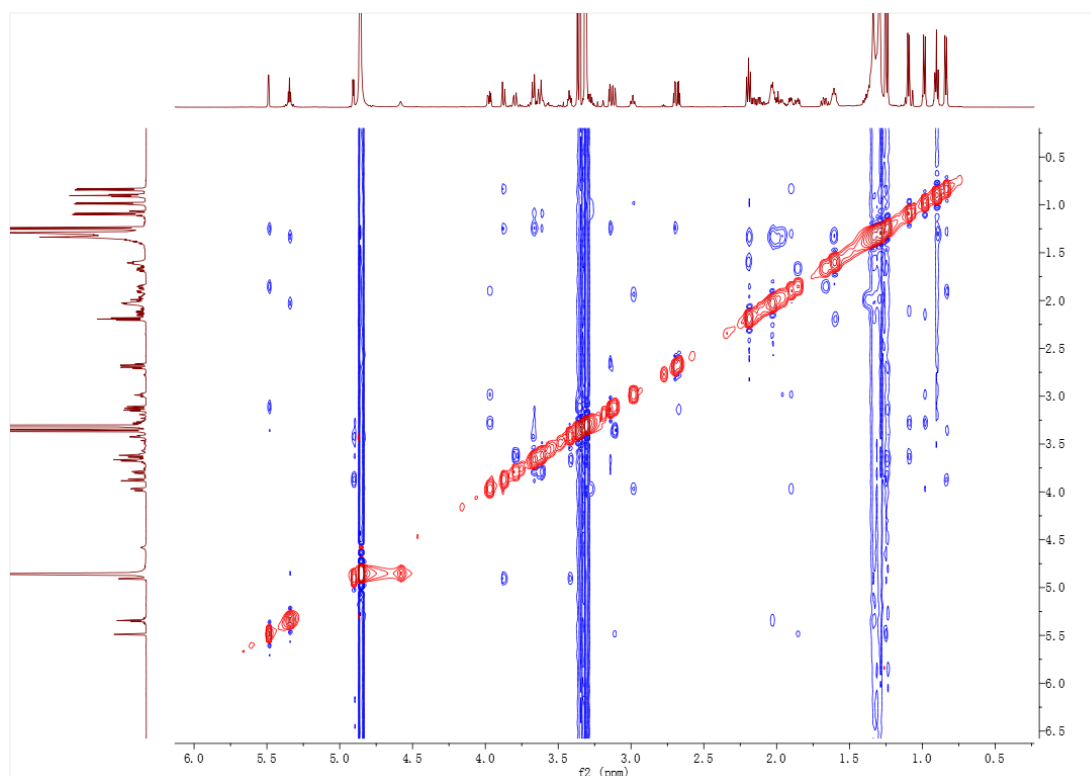

Figure S 43.  $^1\text{H}$  NMR spectrum of compound **9** in  $\text{CD}_3\text{OD}$  (600 MHz)

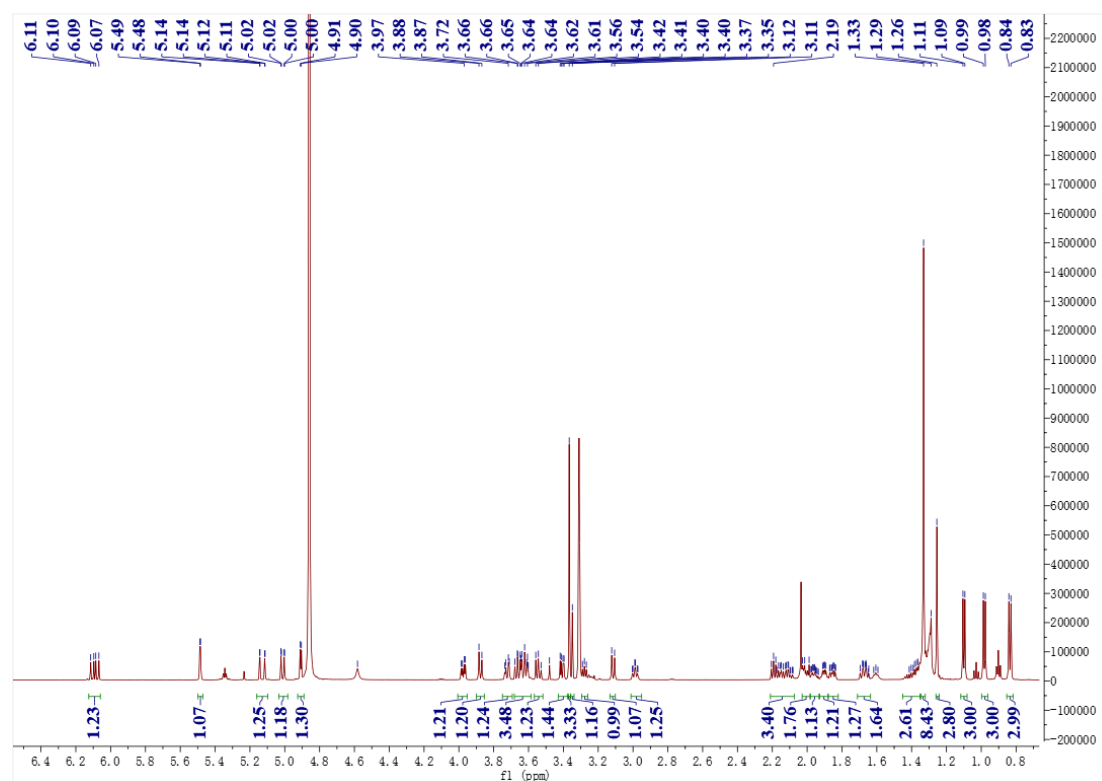

Figure S 44.  $^{13}\text{C}$  NMR and DEPT spectrum of compound **9** in  $\text{CD}_3\text{OD}$  (150 MHz)

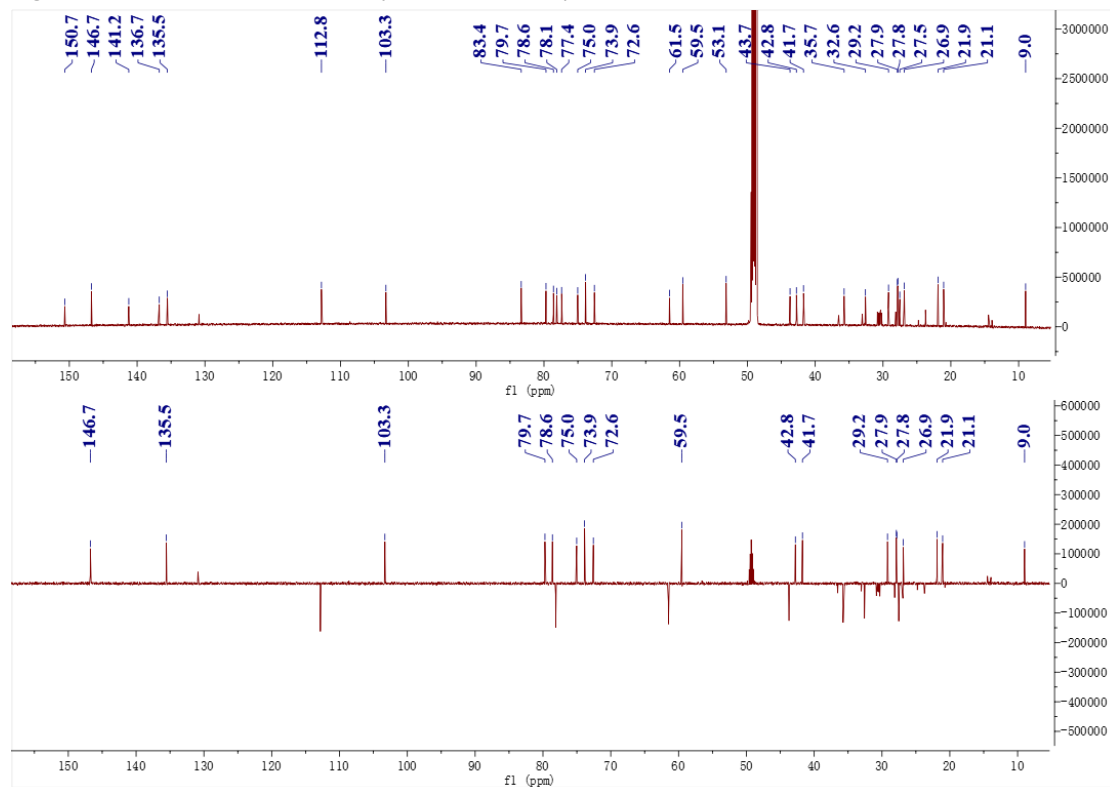



Figure S 45. HSQC spectrum of compound **9** in CD<sub>3</sub>OD (600 MHz)

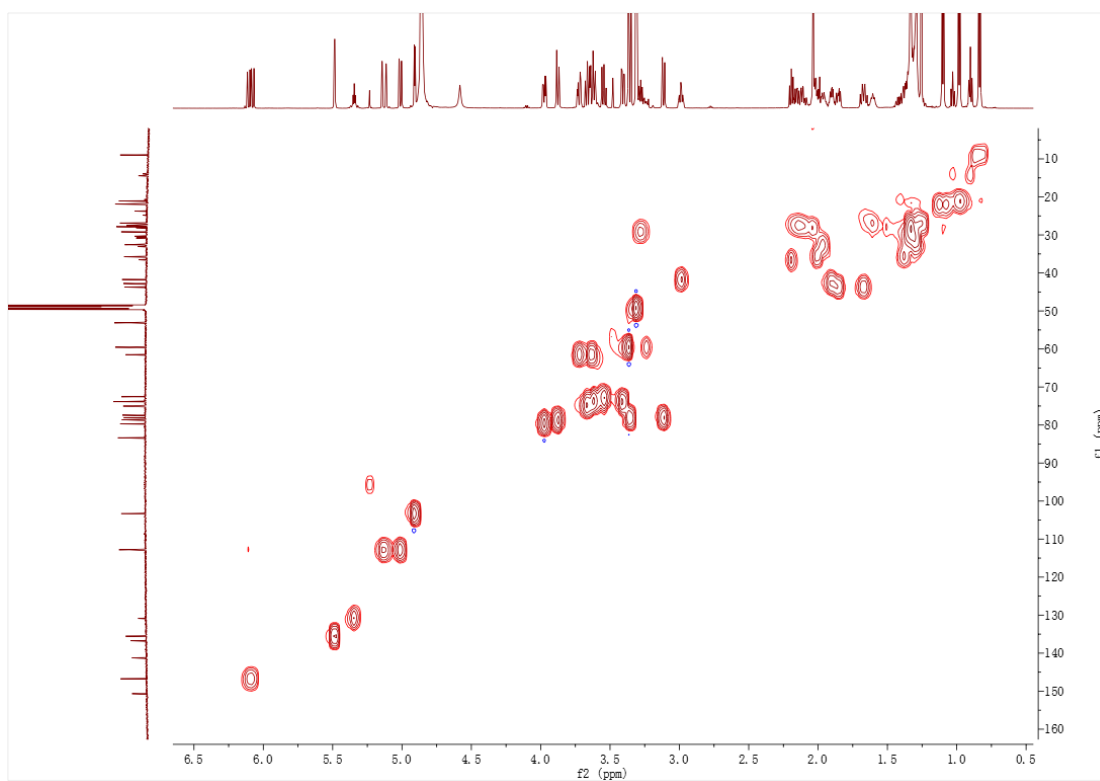

Figure S 46. HMBC spectrum of compound **9** in CD<sub>3</sub>OD (600 MHz)

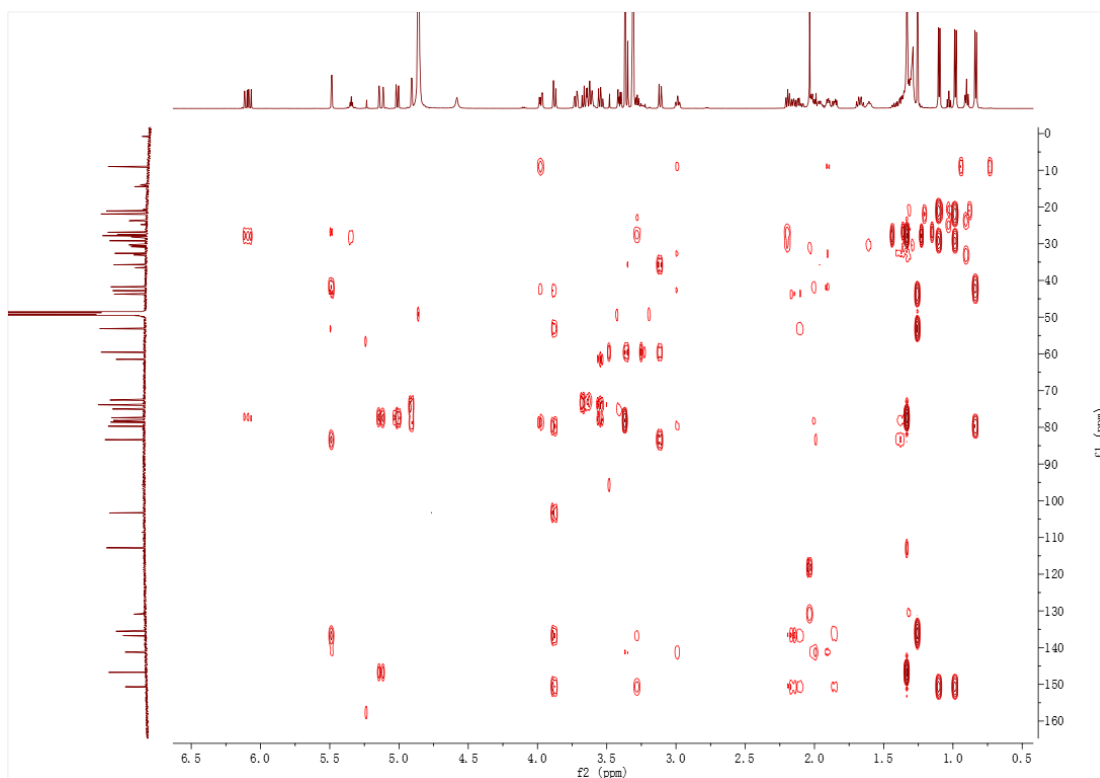

Figure S 47.  $^1\text{H}$ - $^1\text{H}$  COSY spectrum of compound **9** in  $\text{CD}_3\text{OD}$  (600 MHz)

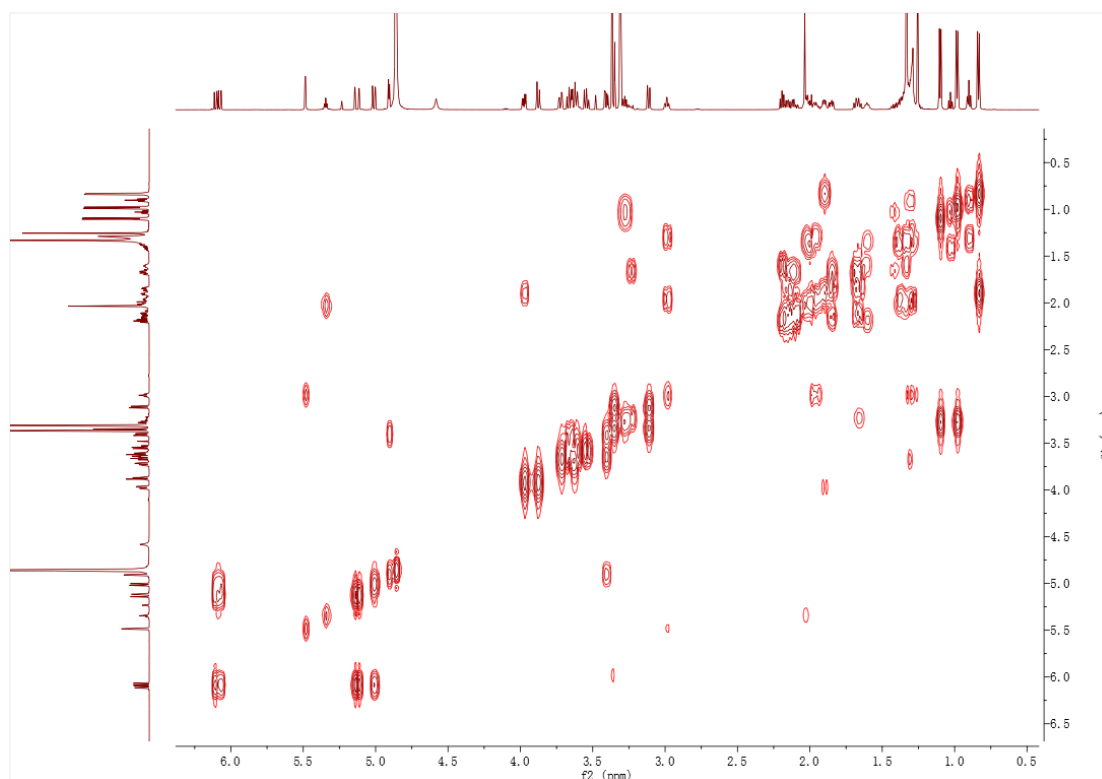

Figure S 48. NOESY spectrum of compound **9** in  $\text{CD}_3\text{OD}$  (600 MHz)

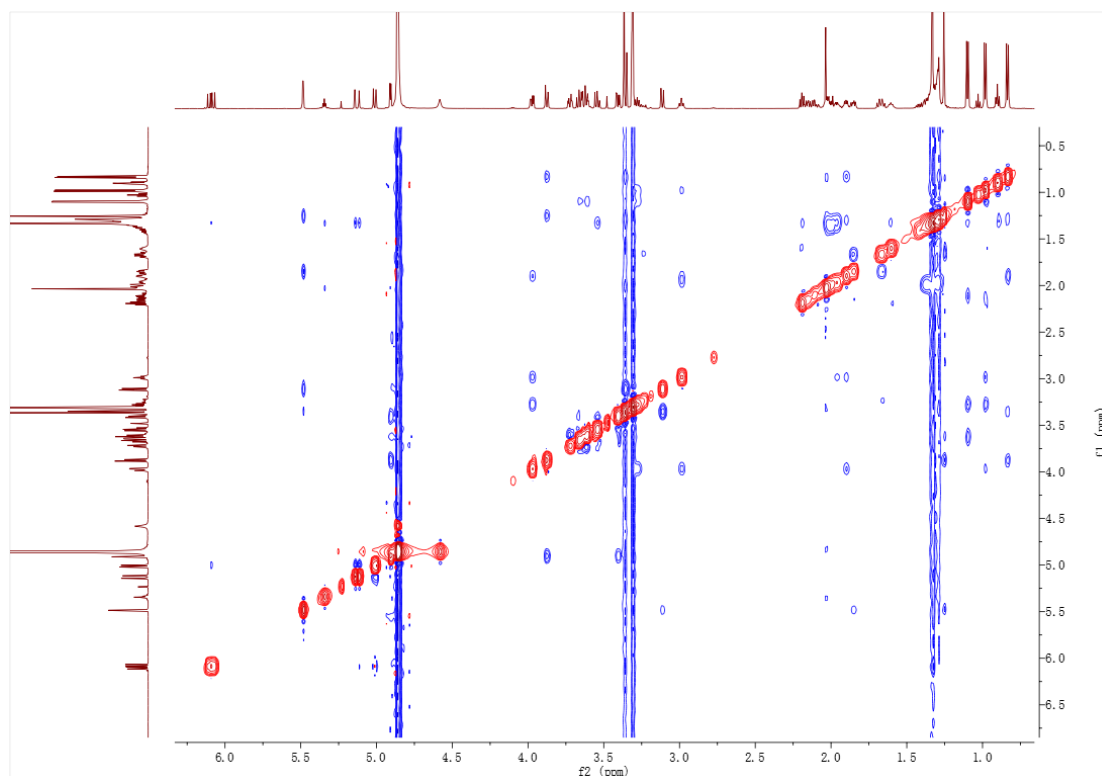

Figure S 49.  $^1\text{H}$  NMR spectrum of compound **10** in  $\text{CD}_3\text{OD}$  (600 MHz)

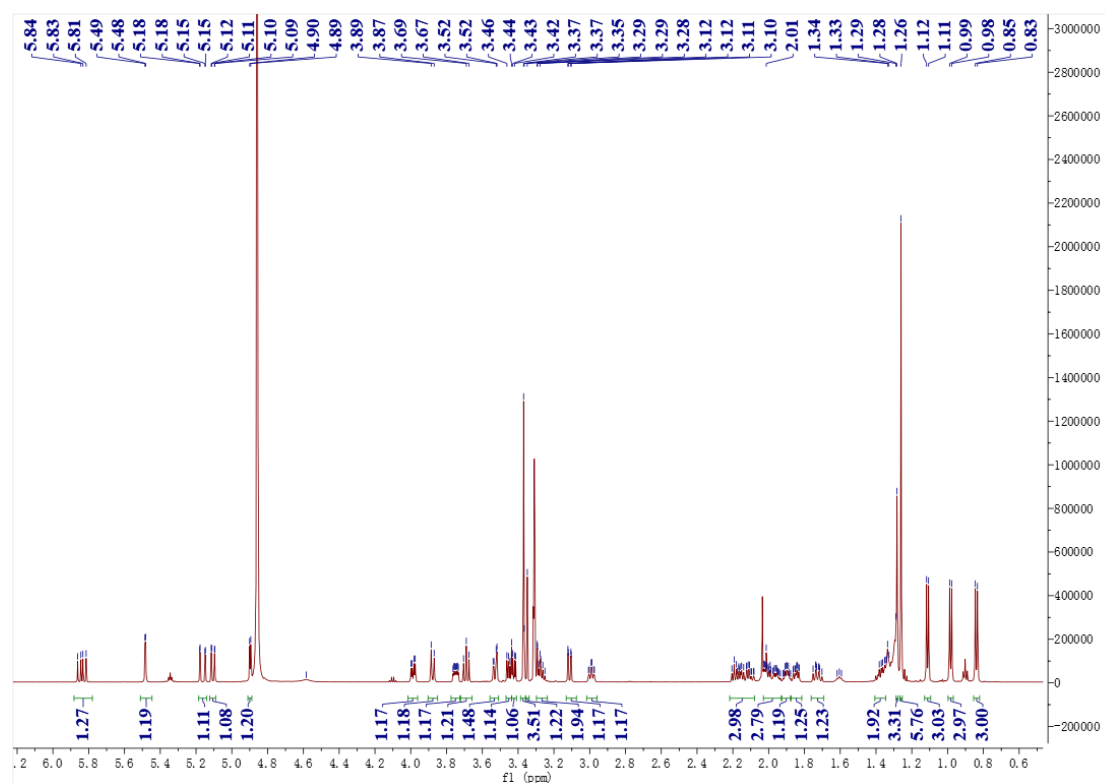

Figure S 50.  $^{13}\text{C}$  NMR and DEPT spectrum of compound **10** in  $\text{CD}_3\text{OD}$  (150 MHz)

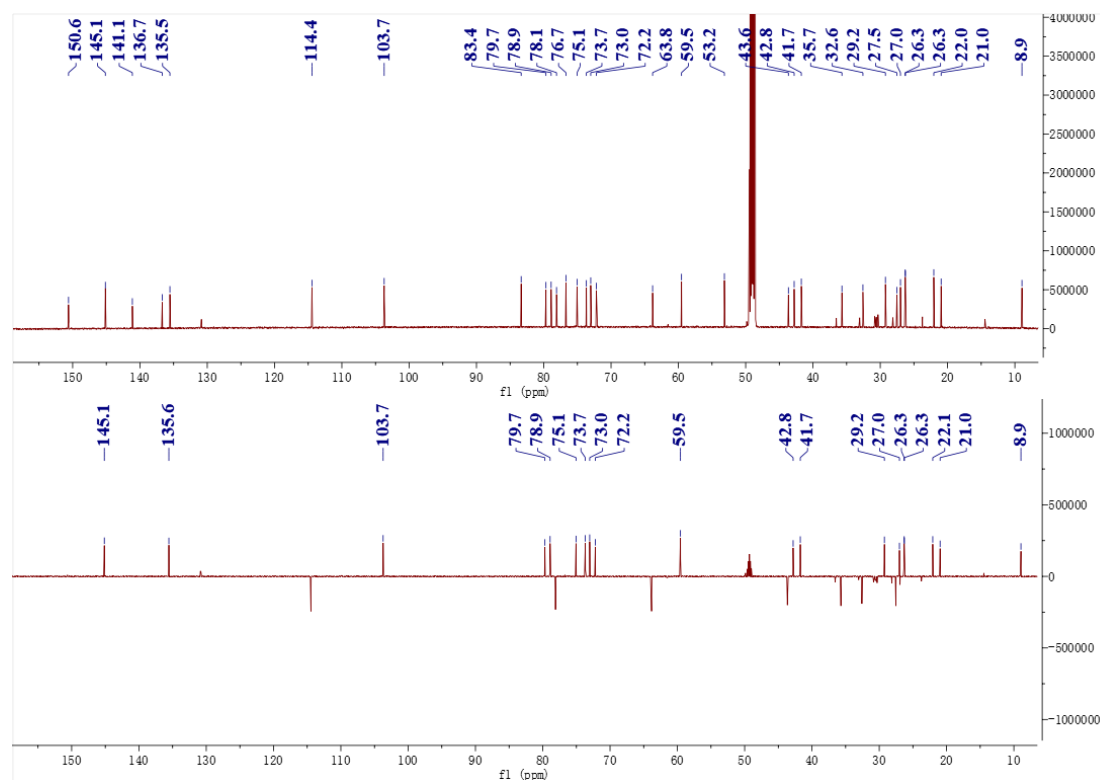

Figure S 51. HSQC spectrum of compound **10** in CD<sub>3</sub>OD (600 MHz)

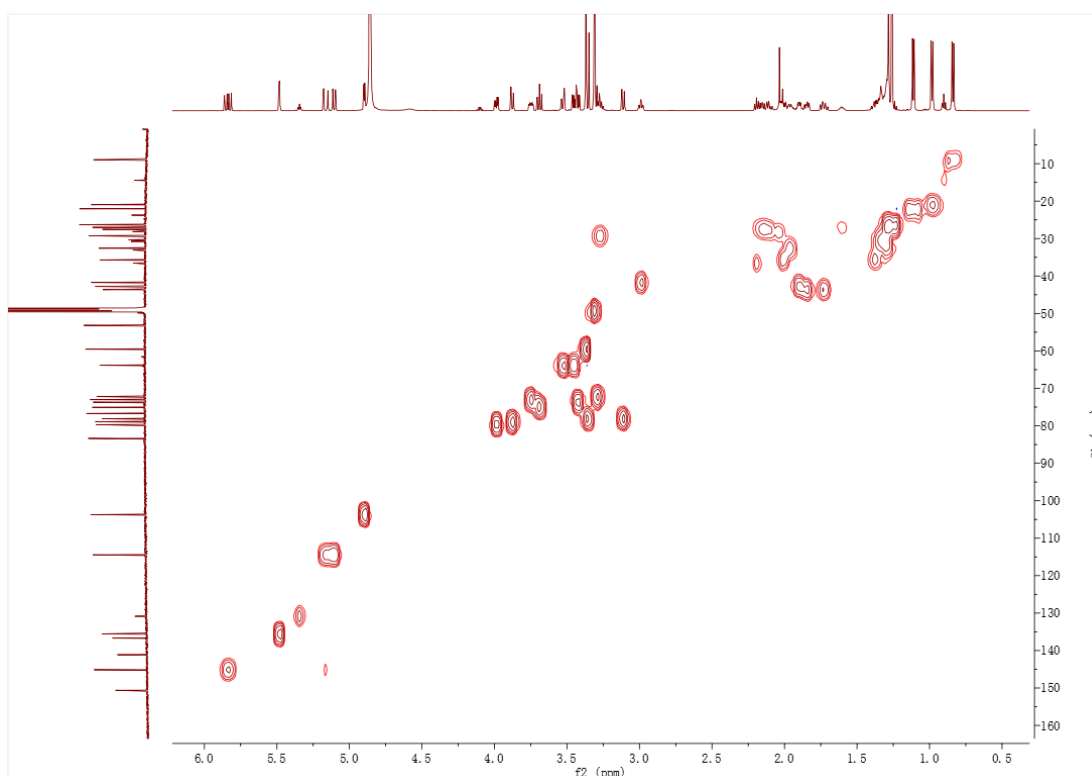

Figure S 52. HMBC spectrum of compound **10** in CD<sub>3</sub>OD (600 MHz)

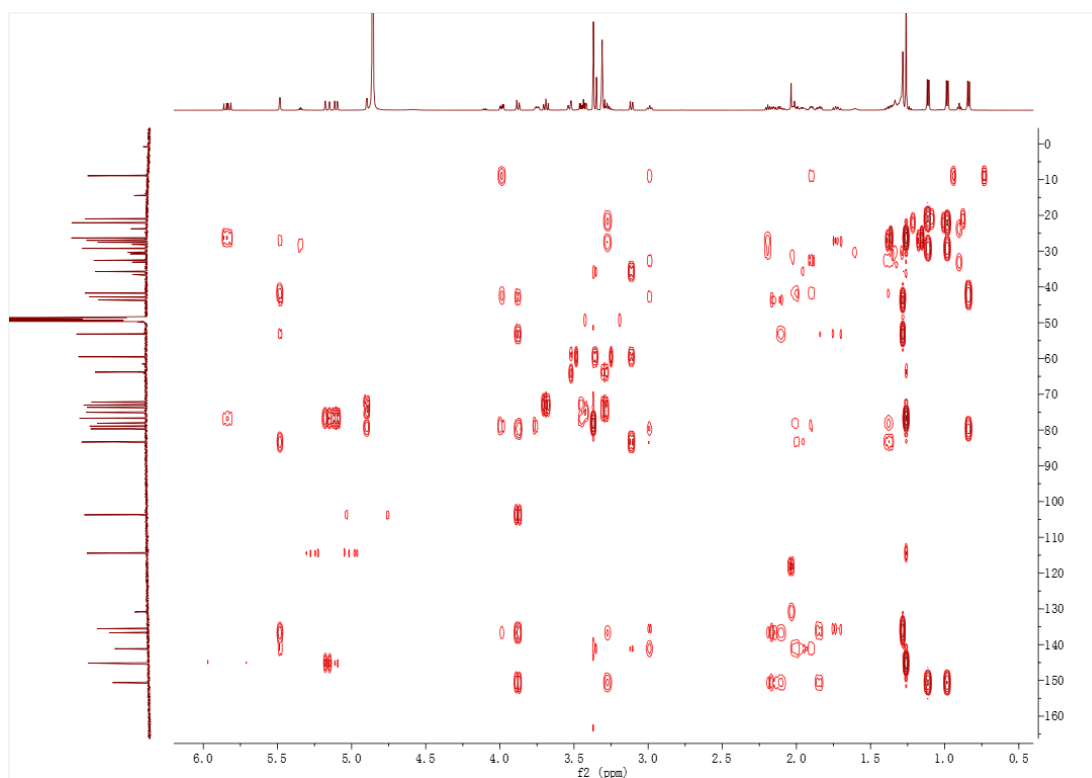

Figure S 53.  $^1\text{H}$ - $^1\text{H}$  COSY spectrum of compound **10** in  $\text{CD}_3\text{OD}$  (600 MHz)

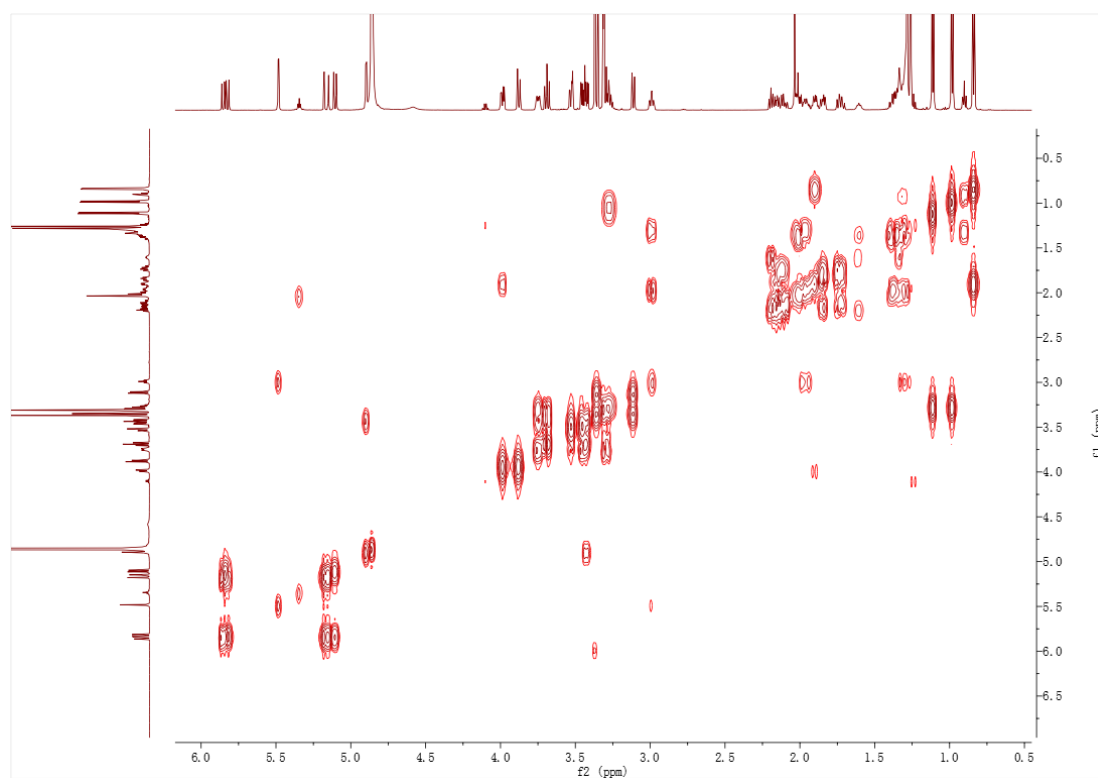

Figure S 54. NOESY spectrum of compound **10** in  $\text{CD}_3\text{OD}$  (600 MHz)

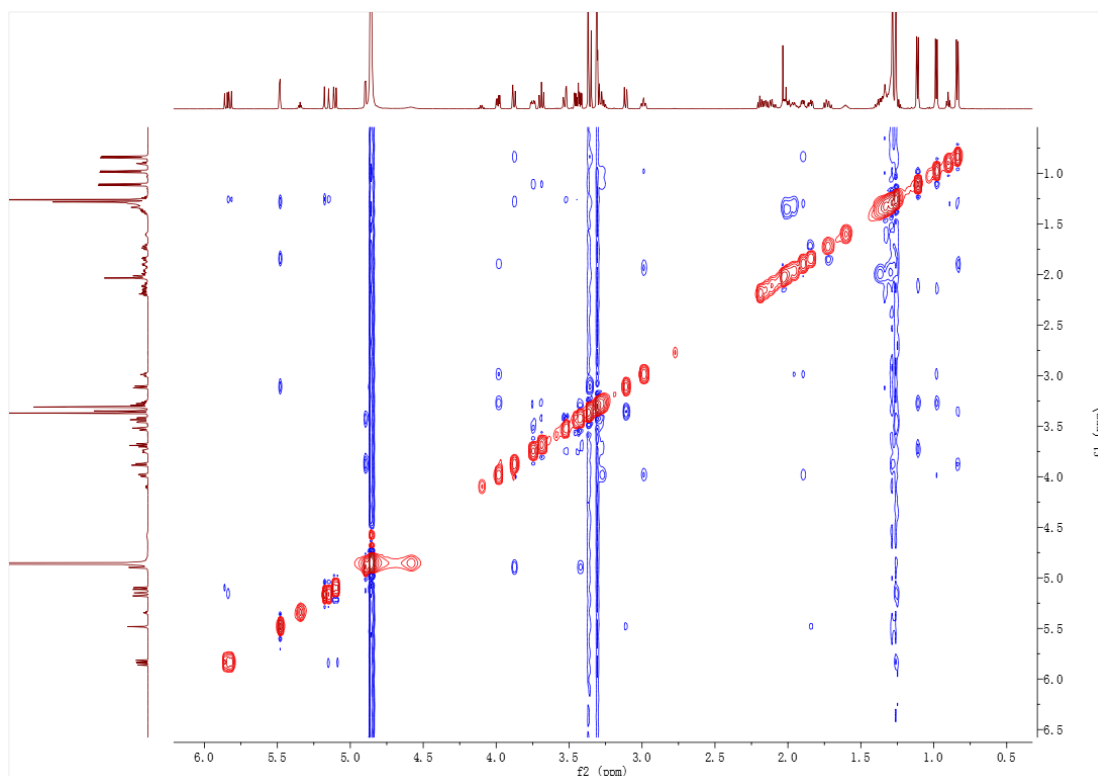

Figure S 55. <sup>1</sup>H NMR spectrum of ISIR-050 in CDCl<sub>3</sub> (600 MHz)

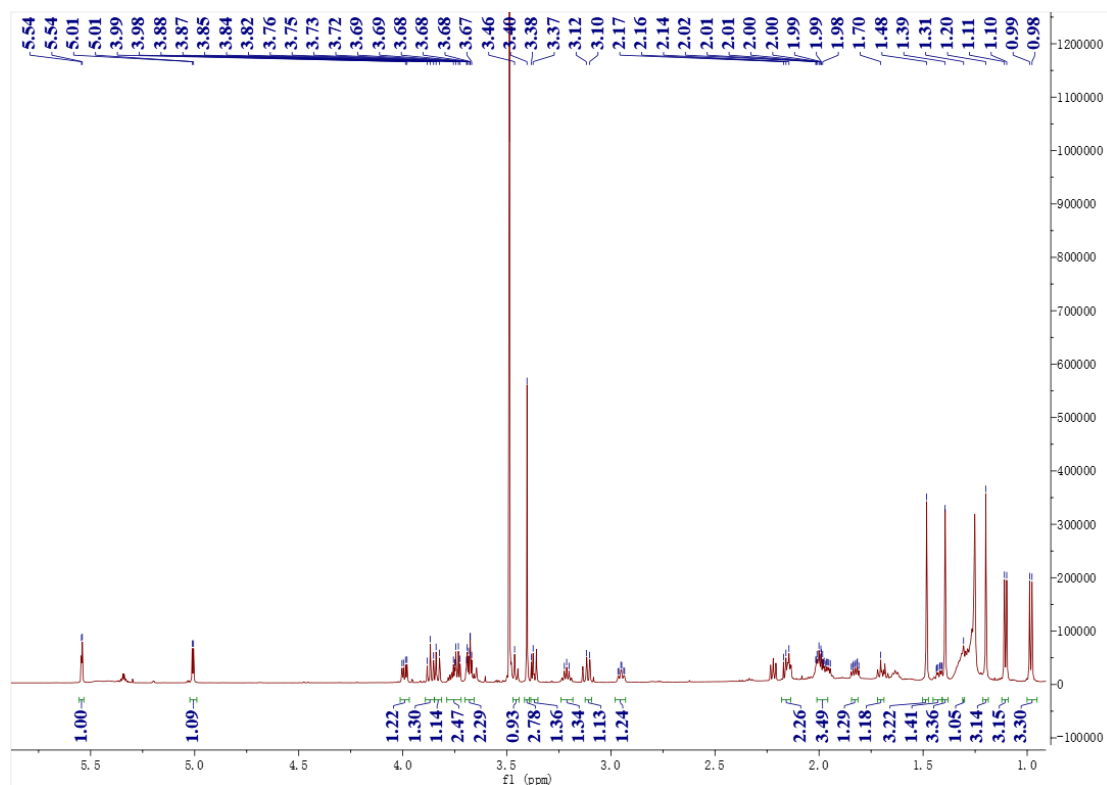

Figure S 56. <sup>13</sup>C NMR spectrum of ISIR-050 in CDCl<sub>3</sub> (150 MHz)

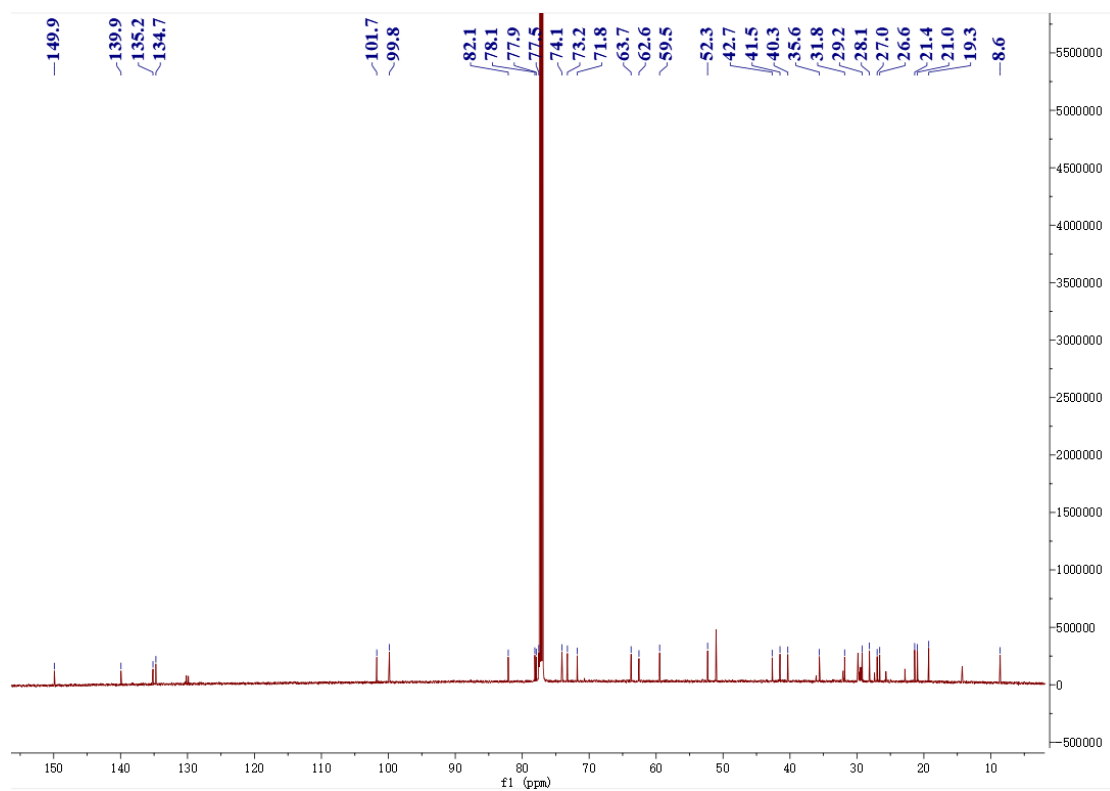

### Supporting references

1. M. C. Tang, H. C. Lin, D. Li, Y. Zou, J. Li, W. Xu, R. A. Cacho, M. E. Hillenmeyer, N. K. Garg and Y. Tang, Discovery of Unclustered Fungal Indole Diterpene Biosynthetic Pathways through Combinatorial Pathway Reassembly in Engineered Yeast, *Journal of the American Chemical Society*, 2015, **137**, 13724-13727.
2. C. Liu, K. Tagami, A. Minami, T. Matsumoto, J. C. Frisvad, H. Suzuki, J. Ishikawa, K. Gomi and H. Oikawa, Reconstitution of biosynthetic machinery for the synthesis of the highly elaborated indole diterpene penitrem, *Angewandte Chemie (International ed. in English)*, 2015, **54**, 5748-5752.
3. M. S. Pedras, P. B. Chumala, W. Jin, M. S. Islam and D. W. Hauck, The phytopathogenic fungus *Alternaria brassicicola*: phytotoxin production and phytoalexin elicitation, *Phytochemistry*, 2009, **70**, 394-402.
4. N. Kato, C.-S. Zhang, T. Matsui, H. Iwabuchi, A. Mori, A. Ballio and T. Sassa, Isolation of (2 $\beta$ )-fusicocca-2,10(14)-diene, a 5-8-5 tricyclic diterpene hydrocarbon biosynthetically related to the fusicoccin aglycon from *Fusicoccum amygdali* and confirmation of its structure by total synthesis, *J. Chem. Soc., Perkin Trans. ,* 1998, **1**, 2473-2474.
5. L. Ralston, S. T. Kwon, M. Schoenbeck, J. Ralston, D. J. Schenk, R. M. Coates and J. Chappell, Cloning, Heterologous Expression, and Functional Characterization of 5-epi-Aristolochene-1,3-Dihydroxylase from Tobacco (*Nicotiana tabacum*), *Archives of Biochemistry and Biophysics*, 2001, **393**, 222-235.
6. M. Molzan, S. Kasper, L. Röglin, M. Skwarczynska, T. Sassa, T. Inoue, F. Breitenbuecher, J. Ohkanda, N. Kato, M. Schuler and C. Ottmann, Stabilization of Physical RAF/14-3-3 Interaction by Cotylenin A as Treatment Strategy for RAS Mutant Cancers, *ACS Chemical Biology*, 2013, **8**, 1869-1875.
7. W. Yuan, F. Li, Z. Chen, Q. Xu, Z. Guan, N. Yao, Z. Hu, J. Liu, Y. Zhou, Y. Ye and Y. Zhang, AbnI: An  $\alpha$ -ketoglutarate-dependent dioxygenase involved in brassicene C H functionalization and ring system rearrangement, *Chinese Chemical Letters*, 2024, **35**.
8. T. Sassa, M. Togashi and T. Kitaguchi, The Structures of Cotylenins A, B, C, D and E, *Agricultural and Biological Chemistry*, 1975, **39**, 1735-1744.
9. T. Sassa and A. Takahama, Carbon-13 NMR Spectra of Cotylenins, *Agricultural and Biological Chemistry*, 1979, **43**, 385-387.
10. T. Sassa and A. Takahama, Isolation and Identification of Cotylenins F and G, *Agricultural and Biological Chemistry*, 1975, **39**, 2213-2215.
11. G. Y. Yuan, J. M. Zhang, Q. D. Xu, H. R. Zhang, C. Hu and Y. Zou, Biosynthesis of Cosmosporasides Reveals the Assembly Line for Fungal Hybrid Terpenoid Saccharides, *Angewandte Chemie (International ed. in English)*, 2023, **62**, e202308887.
